# Supplementary material for: How CD4+ T Cells Transcriptional Profile Is Affected by Culture Conditions: Towards the Design of Optimal In Vitro HIV Reactivation Assays
Source: MDPI journal article supplement (doi:10.3390/biomedicines11030888), 2023-03-13
Supplement: s1 [file s1]

Figure S1.

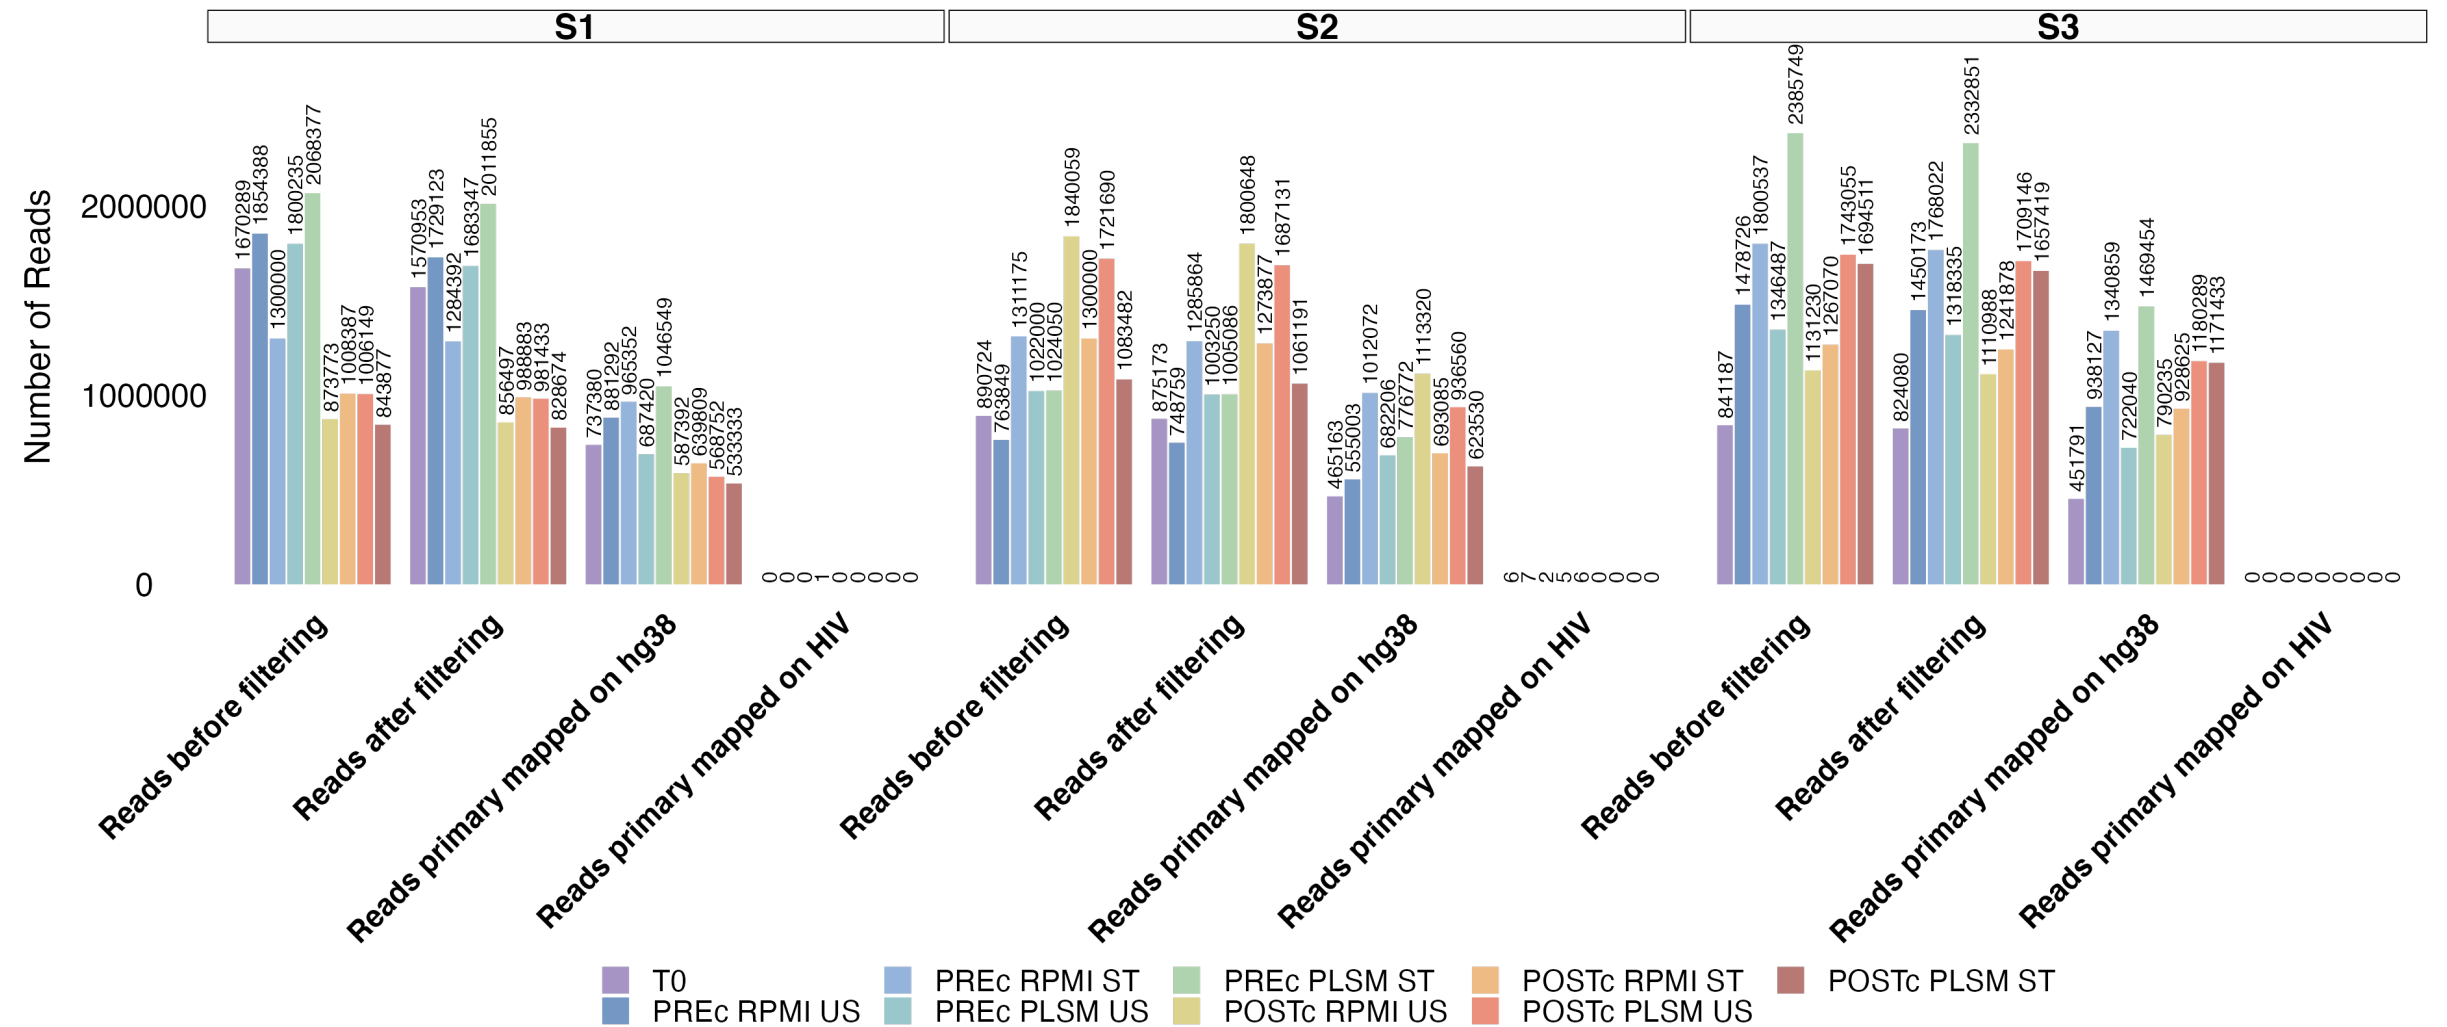

Figure S1. Histogram showing the numbers of total reads sequenced, reads left after filtering (reads with more than 40% of the base with a Phred score of less than 10 were filtered out), 523 reads aligned on the human transcriptome (hg38 Gencode), and reads aligned against the Human 524 immunodeficiency virus type 1 (HXB2) genome sequence.
