# Supplementary material for: How CD4+ T Cells Transcriptional Profile Is Affected by Culture Conditions: Towards the Design of Optimal In Vitro HIV Reactivation Assays
Source: Biomedicines. 2023 Mar 13;11(3):888. doi: 10.3390/biomedicines11030888 (PMC10045592; doi:10.3390/biomedicines11030888)
Supplement: Supplementary file 1 [file biomedicines-11-00888-s001.zip › Supplementary Table S1.xlsx]

## Sheet: Table with All DEGS - 4 columns
Comparison	geneName	logFC	FDR	geneName	logFC	FDR	geneName	logFC	FDR	geneName	logFC	FDR
S1 POSTc PLSM ST vs POSTc PLSM US	MATK	-6.98	0.049	PFKFB4	-3.39	0.044	PALM2AKAP2	4.65	0.019	MRPS11	-2.67	0.047
S1 POSTc PLSM ST vs POSTc PLSM US	CD9	-4.24	0.048	CISH	3.52	0.01	DUSP2	5.84	< 0.001	ZNF438	-7.73	0.009
S1 POSTc PLSM ST vs POSTc PLSM US	PLAUR	5.32	0.003	SGK1	3.55	< 0.001	BTG2	3.43	0.001	ACTG1	2.18	0.048
S1 POSTc PLSM ST vs POSTc PLSM US	FHL1	-4.68	0.017	ZBTB45	-4.36	0.035	CTBP1	-4.95	0.008	BRF1	-4.36	0.035
S1 POSTc PLSM ST vs POSTc PLSM US	KIF1B	-4.3	0.04	GPR68	3.28	0.016	TMPRSS3	3.59	0.03	GP1BA	-7.3	0.023
S1 POSTc PLSM ST vs POSTc PLSM US	SLC2A3	2.29	0.039	COQ6	-4.99	0.008	GAB3	-4.99	0.008	INSIG1	2.42	0.036
S1 POSTc PLSM ST vs POSTc PLSM US	ATP2C2	7.43	0.019	EGR1	9.36	< 0.001	SIK3	-3.48	0.019	SPIN2B	-4.36	0.035
S1 POSTc PLSM ST vs POSTc PLSM US	DGCR2	-4.64	0.019	CD244	4.36	0.048	IER2	4.35	< 0.001	CALHM6	7.29	0.029
S1 POSTc PLSM ST vs POSTc PLSM US	EPN2	4.85	0.011	NAA60	-2.58	0.043	MGAT4B	-4.86	0.01	KIAA0895L	4.42	0.04
S1 POSTc PLSM ST vs POSTc PLSM US	PDE8A	3.38	0.031	EGR2	10.76	< 0.001	TMCO4	-7.07	0.04	ZNF565	7.04	0.049
S1 POSTc PLSM ST vs POSTc PLSM US	FRY	-4.3	0.04	NR4A1	8.63	< 0.001	NLRP3	6.52	< 0.001	IPO4	7.5	0.016
S1 POSTc PLSM ST vs POSTc PLSM US	ACTB	2.2	0.044	COQ8B	-4.28	0.009	COQ8A	-4.64	0.019	SIPA1L1	-4.95	0.008
S1 POSTc PLSM ST vs POSTc PLSM US	AP4E1	-4.73	0.015	CDKN1A	2.7	0.011	CCDC191	-3.66	0.021	HHLA3	-8.06	0.003
S1 POSTc PLSM ST vs POSTc PLSM US	IL12RB2	7.85	0.006	TRIP10	4.54	0.031	CCDC51	-6.98	0.049	ZNF181	-4.07	0.016
S1 POSTc PLSM ST vs POSTc PLSM US	WDR70	-2.91	0.019	MGME1	-4.36	0.035	CEP44	-3.26	0.037	NKIRAS1	-3.13	0.026
S1 POSTc PLSM ST vs POSTc PLSM US	LAT2	7.94	0.004	ZNF384	4.19	0.013	STARD4	4.15	0.006	ZDBF2	-2.96	0.021
S1 POSTc PLSM ST vs POSTc PLSM US	KIZ	-3.65	0.011	METTL25	-7.23	0.029	PRIMPOL	-7.68	0.009	EHMT2	-3.21	0.007
S1 POSTc PLSM ST vs POSTc PLSM US	SIRPG	4.94	0.009	POR	-4.36	0.035	SLC4A2	4.48	0.035	LAYN	7.94	0.004
S1 POSTc PLSM ST vs POSTc PLSM US	TASP1	-8.3	0.001	POT1	-7.37	0.019	MID1IP1	-8.18	0.002	HSPA1B	2.48	0.035
S1 POSTc PLSM ST vs POSTc PLSM US	ICAM1	3.85	0.001	THEMIS2	-7.78	0.008	SMPD1	4.65	0.019	CCHCR1	-5.23	0.003
S1 POSTc PLSM ST vs POSTc PLSM US	BRPF3	-7.78	0.008	PTPRE	2.64	0.043	NUDT13	5.02	0.008	MIR616	4.85	0.011
S1 POSTc PLSM ST vs POSTc PLSM US	IFT74	-3.39	0.044	PRMT7	-3.9	0.027	ATMIN	-7.44	0.016	LINC01089	-5.17	0.004
S1 POSTc PLSM ST vs POSTc PLSM US	DEPDC5	-3.22	0.04	MEN1	5.29	0.003	DHRS13	-7.3	0.023	IFRD2	4.42	0.04
S1 POSTc PLSM ST vs POSTc PLSM US	ATP11C	-4.36	0.035	IL2RA	3.56	< 0.001	ZNF528	-3.57	0.015	CCDC7	-3.81	0.035
S1 POSTc PLSM ST vs POSTc PLSM US	DGKH	2.48	0.04	HOOK1	-3.67	0.049	NUDT16L1	-4.24	0.048	RP11-465B22.3	3.06	0.009
S1 POSTc PLSM ST vs POSTc PLSM US	NME4	-4.36	0.035	ADAM19	2.51	0.049	HEXIM2	-7.15	0.035	LINC00339	-4.38	0.007
S1 POSTc PLSM ST vs POSTc PLSM US	LAPTM4B	4.94	0.009	CPM	7.29	0.029	PKIG	-3.55	0.03	OSER1-DT	-4.2	0.004
S1 POSTc PLSM ST vs POSTc PLSM US	TULP2	2.63	0.025	VILL	-7.15	0.035	FOS	5.85	< 0.001	LINC02611	-4.82	0.011
S1 POSTc PLSM ST vs POSTc PLSM US	CYTH2	2.73	0.031	ITPRID2	5.65	< 0.001	ACYP2	-7.62	0.01	TNF	3.78	0.01
S1 POSTc PLSM ST vs POSTc PLSM US	SUGP1	-3.04	0.044	BCL2A1	3.81	< 0.001	KYAT1	-7.3	0.023	RP11-421L21.3	-7.3	0.023
S1 POSTc PLSM ST vs POSTc PLSM US	PPP3CB	3.47	0.04	ULK3	-4.24	0.048	JUNB	2.41	0.04	MIR155HG	2.45	0.044
S1 POSTc PLSM ST vs POSTc PLSM US	PPIF	7.62	0.011	PRDM15	-3.67	0.049	METTL18	-4.42	0.031	AC003075.4	-3.81	0.035
S1 POSTc PLSM ST vs POSTc PLSM US	PNPO	-4.68	0.017	DPP9	4.42	0.04	DRC3	7.5	0.016	LINC01011	-4.53	0.027
S1 POSTc PLSM ST vs POSTc PLSM US	SNX25	-4.36	0.035	RGS16	3.85	0.001	USP19	-7.37	0.019	IGLL5	-2.49	0.04
S1 POSTc PLSM ST vs POSTc PLSM US	CD69	3.93	< 0.001	AMMECR1L	-4.95	0.008	TNFRSF10D	2.93	0.043	KRT73-AS1	-7.44	0.016
S1 POSTc PLSM ST vs POSTc PLSM US	OGFOD2	-4.42	0.031	CSRNP1	3.1	0.016	SNHG11	-6.98	0.049	NR4A1AS	5.29	0.003
S1 POSTc PLSM ST vs POSTc PLSM US	VDR	7.36	0.023	SLC39A4	-7.15	0.035	KLC2	3.07	0.031	RNA5-8SN3	-2.75	0.011
S1 POSTc PLSM ST vs POSTc PLSM US	RNF8	-3.08	0.04	DHX37	-7.37	0.019	CCDC14	-4.64	0.019	5_8S_rRNA	-2.75	0.011
S1 POSTc PLSM ST vs POSTc PLSM US	PHACTR2	-2.56	0.039	SACS	3.9	0.007	FOSL1	8.04	0.003	RNA5-8SN1	-2.75	0.011
S1 POSTc PLSM ST vs POSTc PLSM US	FBRSL1	-4.42	0.031	PRDM8	7.13	0.04	JUN	2.81	0.011	RNA5-8SN2	-2.75	0.011
S1 POSTc PLSM ST vs POSTc PLSM US	HARS2	-5.45	0.001	TYSND1	-4.73	0.015	CD151	4.48	0.035	SCO2	-6.98	0.049
S1 POSTc PLSM ST vs POSTc PLSM US	HBEGF	7.91	< 0.001	DHRS4	-4.53	0.027	LCORL	-4.48	0.027	NA	NA	NA
S1 POSTc PLSM ST vs T0	TMEM176A	-7.11	0.01	TRIP10	3.47	0.009	RAB26	4.53	0.012	LINC01087	-7.11	0.01
S1 POSTc PLSM ST vs T0	ICA1	-4.52	0.008	SDCBP2	7.79	0.002	ABCA3	-6.7	0.024	LINC01886	-6.7	0.024
S1 POSTc PLSM ST vs T0	TFPI	-2.38	0.011	NAPB	4.1	0.037	BSCL2	-3.73	0.003	SVIL-AS1	-2.81	0.049
S1 POSTc PLSM ST vs T0	PDK2	-4.04	0.012	DTD1	-3.15	0.018	SLC3A2	2.02	0.023	RTCA-AS1	-1.84	0.037
S1 POSTc PLSM ST vs T0	AGK	-3.08	0.013	AP5S1	-7.96	< 0.001	LTBP3	-3.64	0.037	IGHV3-74	-3.59	0.015
S1 POSTc PLSM ST vs T0	ARHGAP44	-6.7	0.024	TBC1D20	2.27	0.02	NUDT16L1	-3.98	0.013	RASAL2-AS1	-3.29	0.001
S1 POSTc PLSM ST vs T0	MARK4	-3.48	0.047	CAPNS1	-2.41	0.022	DDIT4	3.22	< 0.001	RP11-538D16.2	-2.16	0.021
S1 POSTc PLSM ST vs T0	GAS7	-6.88	0.014	HCST	-2.74	0.003	RAB31	-7.88	< 0.001	RP11-535M15.1	-7.38	0.004
S1 POSTc PLSM ST vs T0	MATK	-7.7	0.002	AHDC1	-2.78	0.031	POLR3D	2.28	0.025	LINC02840	-2.27	0.042
S1 POSTc PLSM ST vs T0	CD79B	-3.01	0.01	CFP	-6.7	0.024	CNNM3	-3.48	0.047	POT1-AS1	-2.44	0.02
S1 POSTc PLSM ST vs T0	CDKL5	-1.9	0.04	PLEKHG3	-5.78	< 0.001	SNTB2	-3.64	0.037	XXbac-BPG55C20.7	-9.41	< 0.001
S1 POSTc PLSM ST vs T0	DLEC1	-7.25	0.006	PRDM7	-6.7	0.024	NSG1	-2.68	0.01	GOLGA2P7	3.35	0.004
S1 POSTc PLSM ST vs T0	MGST1	-7.04	0.012	EVI2A	2.47	0.005	TMEM150A	2.92	0.038	LINC01427	-1.98	0.036
S1 POSTc PLSM ST vs T0	ETV7	8.07	< 0.001	BCL11B	-2.1	0.018	HSPBAP1	-2.43	0.042	SLC26A6	4.37	0.016
S1 POSTc PLSM ST vs T0	CD9	-4.04	0.012	IDUA	-6.8	0.018	OR10G3	-2.14	0.046	IGHV3-72	-6.7	0.024
S1 POSTc PLSM ST vs T0	PHF7	-7.6	0.002	TMEM175	-3.31	0.004	SCN9A	-4.39	0.011	AC074289.1	-3.16	0.006
S1 POSTc PLSM ST vs T0	CLCN6	-3.64	0.037	KDM4B	7.79	0.002	CD52	-3.41	< 0.001	TSBP1-AS1	-1.97	0.029
S1 POSTc PLSM ST vs T0	MKS1	-2.59	0.022	TUBA4A	1.95	0.031	ASPSCR1	-3.64	0.037	NRIR	-3.48	0.047
S1 POSTc PLSM ST vs T0	TYROBP	-4.55	< 0.001	ZFP36	1.82	0.037	FASN	2.86	0.019	RP11-57H12.3	-2.18	0.016
S1 POSTc PLSM ST vs T0	BRCA1	-7.18	0.008	ATF4	2.53	0.004	ROBO1	-7.25	0.006	CTA-292E10.6	2.2	0.048
S1 POSTc PLSM ST vs T0	ERCC1	-3.15	0.006	SPECC1	-3.92	0.016	ALCAM	-3.56	0.037	LINC00343	-2.56	0.006
S1 POSTc PLSM ST vs T0	CAPN1	-2.68	0.014	POT1	-7.92	< 0.001	FAM153A	-3.16	0.006	LINC02611	-5.49	< 0.001
S1 POSTc PLSM ST vs T0	AGPS	-2.62	0.01	FOXP2	-7.65	0.002	SIMC1	-2.99	0.032	LINC01537	-3.64	0.037
S1 POSTc PLSM ST vs T0	PLEKHB1	-3.94	0.002	DNAJB9	2.32	0.017	SLC16A5	-7.18	0.008	RP13-188A5.1	-2.27	0.018
S1 POSTc PLSM ST vs T0	AQR	-2.67	0.024	IRF5	-8.28	< 0.001	CDK1	-7.96	< 0.001	SPAG5-AS1	3.38	0.007
S1 POSTc PLSM ST vs T0	FHL1	-4.09	0.012	ARHGAP22	-2.83	0.012	FRMPD2	-6.8	0.018	RP11-301G19.1	-3.29	< 0.001
S1 POSTc PLSM ST vs T0	NLRP2	-2.06	0.04	CHAC1	5.33	< 0.001	SETMAR	-4.88	< 0.001	AC003991.3	-3.37	< 0.001
S1 POSTc PLSM ST vs T0	DERA	-6.96	0.012	MTUS1	-3.92	0.016	CD14	-7.7	0.002	OR2M3	-2.51	0.005
S1 POSTc PLSM ST vs T0	ANK1	-3.64	0.037	SYT5	-3.72	0.03	MZB1	-3.48	0.001	GRASLND	-2.04	0.036
S1 POSTc PLSM ST vs T0	MAP2K3	2.01	0.046	PUDP	-3.92	0.016	PFKFB3	2.29	0.012	IGKV3D-7	-7.88	< 0.001
S1 POSTc PLSM ST vs T0	CYP46A1	-1.96	0.041	SAT1	2.5	0.004	SERPINB9	2.02	0.022	OR9H1P	-2.06	0.021
S1 POSTc PLSM ST vs T0	MFAP3	2.75	0.045	LDLR	2.1	0.021	ACYP2	-8.94	< 0.001	AC015971.2	-3.92	0.016
S1 POSTc PLSM ST vs T0	VCAN	-9.4	< 0.001	GTPBP3	-7.7	0.002	USP32	-4.04	0.012	CCT6P1	2.95	0.024
S1 POSTc PLSM ST vs T0	RIPOR1	2.05	0.039	SNX9	3.82	< 0.001	MTSS1	-3.79	0.024	AC010745.2	-2.96	0.003
S1 POSTc PLSM ST vs T0	CTNS	-6.7	0.024	AFDN	2.29	0.047	TPT1-AS1	2.12	0.027	UBAC2-AS1	-3.92	0.016
S1 POSTc PLSM ST vs T0	THAP3	3.47	0.016	ADRM1	2.17	0.037	KYAT1	-6.96	0.012	CCDC26	-2.19	0.017
S1 POSTc PLSM ST vs T0	SPATA7	-4.3	0.014	ATG4D	4.29	0.024	ATP6V0E2	-3.83	0.002	TTTY10	-3.29	< 0.001
S1 POSTc PLSM ST vs T0	CAPG	-6.3	< 0.001	SESN2	3.23	0.012	POLR1C	-2.85	0.007	SNHG31	-3.36	< 0.001
S1 POSTc PLSM ST vs T0	TRIT1	3.78	0.003	THEMIS2	-8.25	< 0.001	OR2AT4	-1.94	0.033	HLA-DRB6	-4.04	0.012
S1 POSTc PLSM ST vs T0	HSPA5	1.89	0.03	ZNF331	1.79	0.047	RGS19	-4.3	0.014	PATL2	-2.12	0.019
S1 POSTc PLSM ST vs T0	SCML1	5.92	< 0.001	LILRB2	-7.38	0.004	ANO5	-7.88	< 0.001	ELOVL2-AS1	-8.72	< 0.001
S1 POSTc PLSM ST vs T0	HDAC9	-4.15	0.01	ZNF428	-2.74	0.031	NINJ2	-7.43	0.003	AC159540.1	-1.83	0.05
S1 POSTc PLSM ST vs T0	TSPAN17	-7.11	0.01	PPT1	-2.52	0.008	RRM2	-7.38	0.004	LINC02558	-2.33	0.022
S1 POSTc PLSM ST vs T0	H6PD	-2.76	0.02	TRAF3	2.23	0.017	DRC3	4.74	0.007	LINC00486	-3.79	0.024
S1 POSTc PLSM ST vs T0	PER3	-7.6	0.002	SH3BP5	-2.53	0.016	SHLD1	-3.72	0.03	KLF3-AS1	-3.62	0.002
S1 POSTc PLSM ST vs T0	SLC4A8	-6.8	0.018	NAPSB	-7.92	< 0.001	MAL	-2.39	0.007	AC002451.3	-4.65	< 0.001
S1 POSTc PLSM ST vs T0	HERPUD1	2.96	< 0.001	NR1H2	2.08	0.026	OR1A1	-2.32	0.011	AC013448.1	-2.29	0.021
S1 POSTc PLSM ST vs T0	RAD51	-3.72	0.03	GCH1	4.74	0.007	CLEC7A	-4.67	0.004	WARS2-AS1	-2.48	0.014
S1 POSTc PLSM ST vs T0	KIF1B	-5.41	< 0.001	SPATA6	-6.88	0.014	SPTLC3	-3.07	0.001	IGHV4-31	-4.25	0.007
S1 POSTc PLSM ST vs T0	GINM1	-2.51	0.03	CCT6B	-2.64	0.016	OR5A1	-2.21	0.023	RP1-27K12.2	-2.14	0.047
S1 POSTc PLSM ST vs T0	TRAF1	2.14	0.021	RAP1GAP2	-8.49	< 0.001	ARNT2	-7.11	0.01	RP4-669H2.1	-2.19	0.044
S1 POSTc PLSM ST vs T0	TRAF3IP2	-4.34	0.012	GRSF1	2.5	0.027	FGGY	-4.3	0.014	EMBP1	-2.92	0.019
S1 POSTc PLSM ST vs T0	FLYWCH1	-4.08	< 0.001	JCHAIN	-5.77	< 0.001	MAB21L4	-4.3	0.014	RP11-310E22.7	-2.85	0.015
S1 POSTc PLSM ST vs T0	TBXAS1	-8	< 0.001	KDM6B	2.96	0.002	BANP	2.05	0.039	LEF1-AS1	-4.39	0.011
S1 POSTc PLSM ST vs T0	TARBP1	-4.3	0.014	FLOT2	-2.31	0.017	CTSW	-2.95	0.001	SILC1	-1.95	0.03
S1 POSTc PLSM ST vs T0	GATB	-7.32	0.005	ERAL1	-7.18	0.008	RND1	2.92	0.038	LINC01697	-3.98	0.013
S1 POSTc PLSM ST vs T0	SLC2A3	1.85	0.035	PRMT7	-3.5	0.02	LRRC20	-6.7	0.024	LINC01873	-2.44	0.01
S1 POSTc PLSM ST vs T0	PSD	2.92	0.038	PTPRA	-2.32	0.044	RAB37	-2.64	0.007	IGHV3-43	-2.47	0.049
S1 POSTc PLSM ST vs T0	GNA15	4.45	< 0.001	PATJ	-2.06	0.031	NBEA	-3.48	0.047	RP11-47I22.3	-2.39	0.012
S1 POSTc PLSM ST vs T0	QSER1	-3.72	0.03	ATP8A2	-3.64	0.037	LRRN3	-2.4	0.015	TNF	3.87	< 0.001
S1 POSTc PLSM ST vs T0	VMP1	2.42	0.005	TBC1D8B	-2.38	0.008	ESRRA	4.53	0.012	SNHG15	2.34	0.008
S1 POSTc PLSM ST vs T0	SLC6A16	-7.38	0.004	MORC2	-7.88	< 0.001	RAPH1	-6.7	0.024	MIR3936HG	-3.64	0.037
S1 POSTc PLSM ST vs T0	U2AF2	2.03	0.042	LARGE1	-7.6	0.002	PARP15	-3.11	0.001	SNHG7	3.07	0.001
S1 POSTc PLSM ST vs T0	LIMCH1	-7.38	0.004	SLC2A11	-2.37	0.013	MAB21L3	-2.05	0.017	RP11-421L21.3	-8.62	< 0.001
S1 POSTc PLSM ST vs T0	TSPAN32	-4.71	0.004	DYDC2	-4.34	0.012	KCNK7	-6.96	0.012	AC007743.1	-2.32	0.009
S1 POSTc PLSM ST vs T0	ATP2C2	2.82	0.037	TMEM254	-3.98	0.004	TNFRSF10D	2.83	0.008	GPX1	-2.83	0.01
S1 POSTc PLSM ST vs T0	TMEM161A	-4.43	0.011	HSD17B4	-1.98	0.04	CEP83	-4.56	0.007	NKAPP1	-7.79	0.001
S1 POSTc PLSM ST vs T0	CTSA	-2.03	0.042	ELP3	-2.65	0.011	SULT1B1	-1.94	0.031	STXBP5-AS1	-6.7	0.024
S1 POSTc PLSM ST vs T0	FAR2	-6.7	0.024	RSAD2	2.56	0.018	RCE1	3.63	0.006	SLC26A4-AS1	-2.75	0.003
S1 POSTc PLSM ST vs T0	TLE2	-3.85	0.02	LDHA	3.1	< 0.001	C11orf80	-7.18	0.008	RP11-305F18.1	-2.24	0.013
S1 POSTc PLSM ST vs T0	MTHFD2	2.57	0.004	IL2RA	3.47	< 0.001	CMB9-22P13.1	3.32	0.006	IGKV3OR2-268	-6.7	0.024
S1 POSTc PLSM ST vs T0	PDE4A	4.22	< 0.001	TMEM241	-3	0.004	JUP	-6.8	0.018	LERFS	-7.32	0.005
S1 POSTc PLSM ST vs T0	ASPM	-6.88	0.014	YARS1	2.88	0.001	ZNF791	1.95	0.041	RP11-90C4.1	-2.43	0.049
S1 POSTc PLSM ST vs T0	FGFR2	-6.96	0.012	SLC43A3	2.24	0.022	GTF2IRD2B	-2.6	0.012	MIR155HG	7.14	< 0.001
S1 POSTc PLSM ST vs T0	MSANTD3	-3.64	0.037	OASL	2.18	0.035	PELI3	4.46	0.013	HIPK1-AS1	-7.25	0.006
S1 POSTc PLSM ST vs T0	FECH	-4.25	0.007	TRAFD1	2.27	0.024	MRPL11	-2.86	0.005	FBXO30-DT	-2.03	0.024
S1 POSTc PLSM ST vs T0	PRR11	-3.22	0.045	HILPDA	11.21	< 0.001	SLC29A2	-3.92	0.016	OLMALINC	-2.47	0.004
S1 POSTc PLSM ST vs T0	RASGRP2	-2.31	0.008	EPHA7	-2.85	0.042	FAM241A	-1.76	0.048	RBMS3-AS3	-4.22	< 0.001
S1 POSTc PLSM ST vs T0	ABCC9	-2.92	0.002	GPR55	4.1	0.037	HRAS	-7.04	0.012	LINC01814	-1.96	0.049
S1 POSTc PLSM ST vs T0	CLEC2D	2.03	0.019	TSGA10	-2.92	0.019	ADGRE1	-4.34	0.012	AC107081.5	2.75	0.045
S1 POSTc PLSM ST vs T0	NEDD4	-2.43	0.012	SCN2A	-4.15	0.01	C3orf33	-6.8	0.018	PRKG1-AS1	-1.99	0.028
S1 POSTc PLSM ST vs T0	PTPN3	-7.11	0.01	ERMN	4.81	0.005	KLC2	5.21	< 0.001	ANKRD20A7P	-7.83	0.001
S1 POSTc PLSM ST vs T0	SLC44A1	-2.61	0.031	SKIL	2.91	0.002	CTBP2	-3.64	0.037	NIFK-AS1	4.77	< 0.001
S1 POSTc PLSM ST vs T0	DGCR2	-3.79	0.024	DNAJC1	2.01	0.039	DDIT3	5.14	< 0.001	NDUFA6-DT	-3.85	0.02
S1 POSTc PLSM ST vs T0	EPN2	3.78	0.003	LRRC8A	-7.18	0.008	MED16	-3.56	0.037	LINC01358	-2.27	0.012
S1 POSTc PLSM ST vs T0	LIMS2	-6.88	0.014	SMC2	-5.56	< 0.001	CCDC14	-5.43	< 0.001	AL163953.3	-7.18	0.008
S1 POSTc PLSM ST vs T0	PTGS2	-3.79	0.024	KLF4	-7.38	0.004	UCP2	-3.47	< 0.001	RP11-554F20.1	-2.96	0.003
S1 POSTc PLSM ST vs T0	ST6GAL1	-1.95	0.028	STXBP1	-6.7	0.024	FOSL1	8.26	< 0.001	RP5-947P14.1	-2.9	0.037
S1 POSTc PLSM ST vs T0	FRY	-4.88	0.002	RABEPK	-2.53	0.016	B3GALT6	2.19	0.049	LINC01684	-2.5	0.012
S1 POSTc PLSM ST vs T0	EED	2.05	0.023	IL11RA	-2.83	0.008	IP6K1	5.24	0.001	WAKMAR2	-3.11	0.008
S1 POSTc PLSM ST vs T0	BCS1L	-7.74	0.001	HINT2	-2.39	0.03	YES1	2.45	0.027	SHISA9	-1.93	0.04
S1 POSTc PLSM ST vs T0	ENO1	2.42	0.005	IRF4	3.61	0.002	BNIP3	3.92	< 0.001	RP13-143G15.4	-1.89	0.046
S1 POSTc PLSM ST vs T0	FOSL2	2.39	0.029	CPEB2	-4.25	0.007	SMIM19	-3.66	0.002	LINC02245	-3.64	0.037
S1 POSTc PLSM ST vs T0	SART3	2.11	0.024	THAP12	-3.35	0.005	RTTN	-2.23	0.018	AC073130.1	-3.13	0.007
S1 POSTc PLSM ST vs T0	SPAG5	3.4	0.005	PRCP	-2.16	0.03	WDR25	-4.04	0.012	KCNMB2-AS1	-2.52	0.016
S1 POSTc PLSM ST vs T0	NFKB2	2.28	0.013	YAP1	-3.79	0.024	PLAAT3	-3.79	0.024	LINC01410	-4.97	0.002
S1 POSTc PLSM ST vs T0	IL4R	1.89	0.034	RDX	1.93	0.037	OR5AN1	-4.34	0.001	LINC00426	-3.72	0.03
S1 POSTc PLSM ST vs T0	RBFOX1	-6.7	0.024	CASP1	-3.83	0.001	OR4F17	-2.56	0.026	RNY4P25	-7.18	0.008
S1 POSTc PLSM ST vs T0	SDF4	2.49	0.006	MAP2K5	-3.79	0.024	OR51L1	-4.15	0.01	SNORD13	-2.28	0.024
S1 POSTc PLSM ST vs T0	RUNX1T1	-7.79	0.001	MAPKBP1	-3.98	0.013	METRNL	4.19	0.03	ST3GAL6-AS1	-4.67	< 0.001
S1 POSTc PLSM ST vs T0	FKBP7	-4.3	0.014	NUSAP1	-4.67	0.004	GCNT4	-7.32	0.005	IGKV2D-30	-8.18	< 0.001
S1 POSTc PLSM ST vs T0	MKNK1	-2.61	0.015	KNL1	-3.72	0.03	POLE	-2.35	0.047	NME1	-2.13	0.033
S1 POSTc PLSM ST vs T0	PAFAH1B3	-3.92	0.016	PLCB2	-4.85	< 0.001	FAM210A	2.97	0.003	IGKV1D-8	-6.8	0.018
S1 POSTc PLSM ST vs T0	OPHN1	-2.16	0.014	SLC28A2	-2.79	0.014	OR2T12	-4.34	0.012	IGKV1-6	-7.79	0.001
S1 POSTc PLSM ST vs T0	PGM1	3	0.032	RAB1A	2.07	0.022	HIC1	8.22	< 0.001	IGKV3-20	-6.25	< 0.001
S1 POSTc PLSM ST vs T0	KEAP1	-3.48	0.047	DTNB	3.54	0.003	SAMD12	-2.21	0.036	IGKV1D-33	-7.88	< 0.001
S1 POSTc PLSM ST vs T0	SLC4A4	-7.7	0.002	STAMBPL1	-4.04	0.012	CSTF2T	3.7	0.01	LILRA2	-3.56	0.037
S1 POSTc PLSM ST vs T0	AP4E1	-4.56	0.007	TACC2	-2.34	0.018	AGTRAP	-2.8	0.011	AMY2B	-2.38	0.022
S1 POSTc PLSM ST vs T0	MEF2C	-3.73	0.003	DUSP5	2.37	0.034	SVBP	-3.46	0.02	RP11-572M11.4	-3.72	0.03
S1 POSTc PLSM ST vs T0	DELE1	-2.29	0.048	EXOC6	-2.26	0.032	ALS2CL	-3.85	0.02	ZNF542P	-2.95	0.017
S1 POSTc PLSM ST vs T0	IL12RB2	2.26	0.049	IDH1	-7.04	0.012	NDUFV2	2.01	0.024	SOCAR	3.38	0.024
S1 POSTc PLSM ST vs T0	FYB1	-1.85	0.035	APH1B	-3.65	0.004	SH2B1	-2.44	0.037	IGKV1-17	-4.43	0.011
S1 POSTc PLSM ST vs T0	GSK3B	-3.24	0.003	KIF21A	-3.15	0.018	DTX3	-6.88	0.014	CDKN2B-AS1	-2.97	0.006
S1 POSTc PLSM ST vs T0	P2RX5	-3.22	0.016	KLRG1	-2.32	0.044	SLC25A20	-2.9	0.01	IGKV1-16	-7.6	0.002
S1 POSTc PLSM ST vs T0	TDRD3	-4.8	< 0.001	CD27	-2.3	0.024	ERBB4	-6.96	0.012	MIF	1.78	0.044
S1 POSTc PLSM ST vs T0	ZNF671	-6.8	0.018	PHLDA1	2.39	0.018	PARP10	-6.88	0.014	IGKV1D-16	-7.88	< 0.001
S1 POSTc PLSM ST vs T0	SLCO1A2	-2.78	0.031	MMAB	-3.03	0.028	EFCAB13	-6.8	0.018	IGKV2-24	-6.8	0.018
S1 POSTc PLSM ST vs T0	NCOA1	-2.43	0.015	SLC7A1	3	0.003	LINC00652	-2.05	0.045	SUCLG2-AS1	-2.25	0.012
S1 POSTc PLSM ST vs T0	FCN1	-5.43	< 0.001	BRCA2	-7.25	0.006	SLC9A4	-3.41	< 0.001	IGKV3-11	-4.01	< 0.001
S1 POSTc PLSM ST vs T0	MGST2	-3.56	0.037	SETD1B	-2.37	0.037	PRF1	-2.26	0.013	GUSBP2	-2.74	0.031
S1 POSTc PLSM ST vs T0	CHERP	2.9	0.017	SLAIN1	-3.48	0.047	CAPS2	-3.92	0.016	XACT	-2.29	0.008
S1 POSTc PLSM ST vs T0	USP40	-4.2	0.008	RTN1	-6.96	0.012	FAM83H	-7.18	0.008	IGKV1-9	-8.69	< 0.001
S1 POSTc PLSM ST vs T0	FOLH1	-6.7	0.024	GPR65	2.27	0.027	TMEM45A	-1.94	0.03	CTC-340A15.2	-2.69	0.003
S1 POSTc PLSM ST vs T0	MTMR2	-6.88	0.014	SLC24A4	-6.7	0.024	OR5AS1	-3.23	< 0.001	PRR34-AS1	-2.66	0.04
S1 POSTc PLSM ST vs T0	KLHL42	-4.04	0.012	BCL2A1	2.41	0.009	RFX7	-3.98	0.013	IGKV1-33	-7.96	< 0.001
S1 POSTc PLSM ST vs T0	DNM1L	-2.03	0.037	DNAJA4	7.27	0.008	RTKN2	-3.03	0.028	TCP10L	-2.65	0.013
S1 POSTc PLSM ST vs T0	CASS4	-2.56	0.026	FURIN	4.07	< 0.001	TSEN54	-2.9	0.037	IGKV1-39	-4.59	< 0.001
S1 POSTc PLSM ST vs T0	AAMDC	-3.98	0.013	MYLK3	-2.16	0.048	UBA7	-3.27	0.002	LINC01206	-2.45	0.006
S1 POSTc PLSM ST vs T0	KIZ	-3.33	0.006	MAP1LC3B	1.79	0.048	SHISAL2A	-2.85	0.042	IGKV2D-28	-5.41	< 0.001
S1 POSTc PLSM ST vs T0	DZANK1	-6.7	0.024	RHOT2	-3.48	0.047	CACNB4	-3.48	0.047	HLA-DMB	-2.82	0.005
S1 POSTc PLSM ST vs T0	TASP1	-7.38	0.004	GAS8	4.1	0.037	SPNS3	-7.83	0.001	RP11-54O7.14	3.07	0.018
S1 POSTc PLSM ST vs T0	OAS1	-2.23	0.011	C17orf80	-7.32	0.005	PLCB1	-4.81	0.003	LINC00882	-2.23	0.025
S1 POSTc PLSM ST vs T0	RGS1	3.7	< 0.001	BCAS3	-4.54	< 0.001	NEB	-6.8	0.018	IGKV3-7	-3.79	0.024
S1 POSTc PLSM ST vs T0	ICAM1	5.55	< 0.001	ASXL3	-7.32	0.005	POTEC	-5.78	< 0.001	IGKV2-30	-8.07	< 0.001
S1 POSTc PLSM ST vs T0	LYZ	-7.77	< 0.001	PELP1	-3.56	0.037	BCOR	4.1	0.037	IGKV1-12	-7.65	0.002
S1 POSTc PLSM ST vs T0	AARS1	2.42	0.008	SLC14A1	-7.18	0.008	OR56A4	-2.33	0.015	IGKV1-5	-6.22	< 0.001
S1 POSTc PLSM ST vs T0	EXOC1	2.19	0.049	TMC6	-1.94	0.036	ZNF438	-7.96	< 0.001	RN7SL832P	4.68	0.008
S1 POSTc PLSM ST vs T0	NRCAM	-6.7	0.024	SLC16A3	2.85	0.016	HMCES	3.33	0.001	WDR86-AS1	-7.25	0.006
S1 POSTc PLSM ST vs T0	ITGA6	-2.4	0.016	SECTM1	4.19	0.03	UPP1	2.03	0.021	ZNF512	-2.34	0.024
S1 POSTc PLSM ST vs T0	HAUS4	-4.52	< 0.001	FBXO15	-2.17	0.021	LIN9	-6.7	0.024	PPIEL	-2.14	0.047
S1 POSTc PLSM ST vs T0	UNC13D	-4.39	0.011	CACNA1A	-3.79	0.024	SDR42E2	-4.15	0.01	LINC01011	-3.85	0.02
S1 POSTc PLSM ST vs T0	GPATCH2	-4.52	0.008	SCYL1	7.72	0.002	LRTOMT	-3.48	0.047	IGKV2-28	-5.36	< 0.001
S1 POSTc PLSM ST vs T0	CDC45	-6.88	0.014	ADAMTS10	-6.96	0.012	OR1D2	-2.93	0.004	LINC01322	-4.39	0.011
S1 POSTc PLSM ST vs T0	ADA2	-2.25	0.014	CAPN10	-3.48	0.047	TSPYL2	2.44	0.008	IGKV3-15	-4.81	< 0.001
S1 POSTc PLSM ST vs T0	WHRN	2.64	0.031	MYO1F	-2.99	0.003	CLECL1	3.38	0.024	IGKV1-27	-7.04	0.012
S1 POSTc PLSM ST vs T0	CREM	4.98	< 0.001	NLRP12	-7.18	0.008	PLA2G6	-7.7	0.002	HBB	-7.43	0.003
S1 POSTc PLSM ST vs T0	BRPF3	-7.74	0.001	ARHGEF19	-6.96	0.012	SS18L1	2.64	0.042	LIFR-AS1	-3.48	0.047
S1 POSTc PLSM ST vs T0	IL12RB1	-4.46	< 0.001	PLK4	-7.43	0.003	CCR10	-6.88	0.014	LINC00861	-4.14	< 0.001
S1 POSTc PLSM ST vs T0	ACOT7	-7.65	0.002	GPR161	-6.7	0.024	WDR27	3.08	0.047	RP11-10K16.1	-2.12	0.03
S1 POSTc PLSM ST vs T0	PCSK5	-2.25	0.024	NUF2	-7.32	0.005	PIWIL3	-6.7	0.024	DRAIC	-6.7	0.024
S1 POSTc PLSM ST vs T0	MARCHF2	-3.56	0.037	PFDN2	3.25	0.002	MED12	3.06	0.004	SBF2-AS1	-2.15	0.02
S1 POSTc PLSM ST vs T0	CECR2	-6.7	0.024	PRCC	2.7	0.015	SATL1	-3.02	0.007	MIR210HG	5.14	0.002
S1 POSTc PLSM ST vs T0	LGALS2	-7.11	0.01	FCRL5	-3.96	0.002	IMMP2L	-4.04	0.012	CTD-2260A17.2	-7.55	0.003
S1 POSTc PLSM ST vs T0	DEPDC5	-2.85	0.024	MRPL24	-3.19	0.009	BRI3BP	-3.17	0.01	RP11-373N22.3	-2.33	0.008
S1 POSTc PLSM ST vs T0	CENPM	-2.66	0.04	RGS16	4.62	< 0.001	MAFF	3.83	< 0.001	ZBED5-AS1	-4.08	< 0.001
S1 POSTc PLSM ST vs T0	TPTEP1	-3.56	< 0.001	TARS2	-2.93	0.012	TNFAIP2	-8	< 0.001	CTC-441N14.2	-3.75	0.003
S1 POSTc PLSM ST vs T0	XBP1	2	0.024	GABPB2	-2.19	0.039	KLHL33	-3.15	< 0.001	STX18-AS1	-1.89	0.038
S1 POSTc PLSM ST vs T0	JOSD1	2.85	0.004	SUSD4	-6.7	0.024	TEDC1	-3.64	0.037	UBA6-AS1	-2.48	0.014
S1 POSTc PLSM ST vs T0	APOL4	-3.4	0.005	DUSP10	3.56	0.004	METTL7A	-3.24	0.005	LINC02268	-2.31	0.015
S1 POSTc PLSM ST vs T0	NCF4	-7.55	0.003	ATP8B2	-2.51	0.012	PARPBP	-4.09	0.012	LINC00504	-1.92	0.03
S1 POSTc PLSM ST vs T0	NIN	-2.12	0.024	ADAM15	1.91	0.048	MUC1	-8	< 0.001	RP4-598P13.1	-2.17	0.047
S1 POSTc PLSM ST vs T0	CDKN3	-3.85	0.02	S100A8	-11.41	< 0.001	MRPL40	-3.02	0.016	C8orf34-AS1	-3.16	0.006
S1 POSTc PLSM ST vs T0	ALKBH1	-3.48	0.047	GUK1	1.79	0.044	SHC4	-2.51	0.03	FMN1	-7.38	0.004
S1 POSTc PLSM ST vs T0	ZC3H14	2.74	0.009	PSEN2	-2.7	0.004	C16orf54	-1.93	0.04	LINC00939	-2.49	0.026
S1 POSTc PLSM ST vs T0	GSKIP	-3.48	0.047	PPFIA4	8.02	< 0.001	NKAIN3	-2.49	0.005	LINC01088	-1.95	0.034
S1 POSTc PLSM ST vs T0	VRK1	-1.94	0.03	ETAA1	-3.72	0.03	MRTFB	-2.89	0.008	UGDH-AS1	-2.43	0.008
S1 POSTc PLSM ST vs T0	CCNB1IP1	2.63	0.005	MEIS1	-7.7	0.002	TMEM212	-2.13	0.025	LINC02503	-3.16	< 0.001
S1 POSTc PLSM ST vs T0	SRP54	2.16	0.016	AFF3	-3.59	0.015	ANKRD37	3.13	0.003	LINC02465	-6.8	0.018
S1 POSTc PLSM ST vs T0	RAB5IF	2.31	0.012	AMMECR1L	-3.48	0.047	INSIG1	2.55	0.005	NOP14-AS1	-2.81	0.049
S1 POSTc PLSM ST vs T0	SLCO4A1	4.93	0.004	SCN1A	-7.79	0.001	ANKRD20A5P	-6.96	0.012	RP11-114H21.2	-7.25	0.006
S1 POSTc PLSM ST vs T0	CDC25B	-8.99	< 0.001	SLC4A10	-7.83	0.001	MYT1L	-2.68	0.012	LINC02742	-3.51	0.007
S1 POSTc PLSM ST vs T0	TRIB3	3.96	< 0.001	SPAG16	-4.2	0.008	OR10H1	-2.47	0.049	RP11-381K20.2	-2.21	0.023
S1 POSTc PLSM ST vs T0	SAMHD1	-2.15	0.014	GMPPA	-4.75	0.004	LILRB4	-3.71	0.011	LINC02762	-3.63	0.013
S1 POSTc PLSM ST vs T0	CST3	-9.59	< 0.001	RBMS3	-8.11	< 0.001	TNFRSF4	3.49	< 0.001	EDIL3-DT	-2.27	0.042
S1 POSTc PLSM ST vs T0	DHX35	-7.83	0.001	CSRNP1	3.25	0.002	TNFRSF18	3.36	0.005	RP11-631M6.2	2.42	0.03
S1 POSTc PLSM ST vs T0	CEP192	-2.63	0.023	MANF	2.44	0.012	CYP4A11	-6.88	0.014	LINC01182	-7.38	0.004
S1 POSTc PLSM ST vs T0	NOL4	-7.49	0.003	SCD5	-3.37	0.027	PLCD1	-4.81	0.003	ZBED3-AS1	-1.85	0.044
S1 POSTc PLSM ST vs T0	STS	-2.75	0.01	MARCHF1	-7.65	0.002	SHTN1	-6.7	0.024	RP11-582J16.4	-2	0.031
S1 POSTc PLSM ST vs T0	PGRMC1	-3.85	0.02	SRD5A1	-2.08	0.024	DHRS4L2	-6.96	0.012	RP11-37B2.1	-2.9	0.001
S1 POSTc PLSM ST vs T0	ATP11C	-4.48	0.009	SKP2	-2.64	0.005	TRPV2	-2.38	0.042	LINC02475	-3.92	0.016
S1 POSTc PLSM ST vs T0	MCF2	-6.96	0.012	GZMA	-2.57	0.035	NHEJ1	-3.03	0.028	RP11-484O2.1	-2.7	0.017
S1 POSTc PLSM ST vs T0	EMD	2.86	0.002	COMMD10	-3.27	0.037	DNAH17	2.22	0.046	IGKV1D-39	-4.59	< 0.001
S1 POSTc PLSM ST vs T0	PGK1	2.39	0.006	ARHGAP26	-2.27	0.013	OR6C75	-3.21	0.001	LINC02482	-4.25	0.007
S1 POSTc PLSM ST vs T0	CD99L2	-2.82	0.028	FBXO38	-2.51	0.019	TPRG1	-7.49	0.003	LINC02754	-3.22	0.045
S1 POSTc PLSM ST vs T0	ACP5	-2.16	0.042	PRIM2	-3.72	0.03	RP11-43F13.1	-3.98	0.013	RNA5-8SP6	-3.29	0.004
S1 POSTc PLSM ST vs T0	KATNAL1	-6.7	0.024	TMEM168	2.45	0.049	AGRN	2.8	0.003	RNY4	-8.21	< 0.001
S1 POSTc PLSM ST vs T0	DHRS12	-7.43	0.003	TRAPPC14	5.19	0.001	FAM166A	7.79	0.002	LINC01609	-3	0.001
S1 POSTc PLSM ST vs T0	VAC14	-3.48	0.047	SLC12A9	-3.9	0.002	ZNF626	-4.52	0.008	RP11-238K6.1	-2.62	0.047
S1 POSTc PLSM ST vs T0	COG4	-3.02	0.003	NCAPG2	-4.07	0.004	ZNF793	-4.6	0.006	PCAT1	-3.92	0.016
S1 POSTc PLSM ST vs T0	COTL1	-3.2	0.002	CASK	-2.8	0.009	TUBB4B	1.99	0.033	CTA-398F10.1	-4.71	< 0.001
S1 POSTc PLSM ST vs T0	ZNF500	-3.72	0.03	ERLIN2	-6.88	0.014	SELL	-3.19	< 0.001	IGHGP	-3.92	0.016
S1 POSTc PLSM ST vs T0	CLCN7	2.58	0.016	SLC39A4	-8.4	< 0.001	HBA2	-8	< 0.001	IGLV1-41	-4.09	0.012
S1 POSTc PLSM ST vs T0	SLC7A5	4.71	< 0.001	IDNK	-4.6	0.006	OR2G6	-2.23	0.025	LINC01608	-1.87	0.036
S1 POSTc PLSM ST vs T0	MEFV	-3.64	0.037	ASTN2	-2.82	0.005	DPYD	-5.06	0.001	RP11-61L23.2	3.89	< 0.001
S1 POSTc PLSM ST vs T0	GGA2	2.54	0.022	MIGA2	-2.46	0.038	UROS	-4.26	0.002	RP11-17A4.2	-2.83	0.002
S1 POSTc PLSM ST vs T0	BCKDK	5.41	< 0.001	RSU1	-2.77	0.006	FSIP2	-3.62	< 0.001	AP000662.4	-7.43	0.003
S1 POSTc PLSM ST vs T0	TTC23	-6.88	0.014	ADD3	-2.85	0.002	NHLRC3	-7.55	0.003	IGLL5	-4.86	< 0.001
S1 POSTc PLSM ST vs T0	FAH	3.07	0.018	ADM	4.29	0.024	CALHM6	7.51	0.003	CTD-2184C24.2	-8.34	< 0.001
S1 POSTc PLSM ST vs T0	ATP8B4	-7.83	0.001	C11orf49	-2.18	0.045	RELN	-7.92	< 0.001	FAM66D	-4.15	0.01
S1 POSTc PLSM ST vs T0	GABPB1	2.57	0.011	PAK1	-2.85	0.011	FAM111B	-2.18	0.022	STX17-AS1	-2.21	0.018
S1 POSTc PLSM ST vs T0	DMXL2	-3.72	0.03	TTC12	-3.85	0.02	PAX8-AS1	-4.43	0.011	SNHG1	1.92	0.028
S1 POSTc PLSM ST vs T0	CPQ	-3.48	0.047	HYOU1	2.38	0.01	ZKSCAN3	-2.41	0.011	CCND2-AS1	-6.88	0.014
S1 POSTc PLSM ST vs T0	LAPTM4B	2.5	0.027	EML3	-2.81	0.049	USP32P3	-2.44	0.009	RP11-575F12.2	-3.74	0.01
S1 POSTc PLSM ST vs T0	GDAP1	-2.79	0.004	FEZ1	4.98	0.003	IL1RAP	-3.15	0.018	CTSO	-2.94	0.007
S1 POSTc PLSM ST vs T0	NDRG1	2.04	0.023	SIDT2	2.14	0.04	CCDC189	-6.88	0.014	COA8	1.92	0.047
S1 POSTc PLSM ST vs T0	NCALD	-3.92	0.016	LTO1	-4.04	0.012	S100A4	-5.36	< 0.001	DNAAF4	-3.79	0.024
S1 POSTc PLSM ST vs T0	MCM4	-7.6	0.002	ALDOA	1.85	0.035	PLEKHG4	-3.56	0.037	ZNF432	2.41	0.035
S1 POSTc PLSM ST vs T0	ASAH1	-2.8	0.003	KLRF1	-6.8	0.018	COLCA1	-1.89	0.047	LINC00507	-1.85	0.049
S1 POSTc PLSM ST vs T0	BNIP3L	2.92	0.001	ARID5B	1.77	0.047	STK40	1.96	0.034	RP11-1143G9.4	-9.88	< 0.001
S1 POSTc PLSM ST vs T0	FCGRT	-8.04	< 0.001	KIAA1328	-2.66	0.005	OR2C3	-6.8	0.018	LINC00485	-2.43	0.018
S1 POSTc PLSM ST vs T0	RNASEH2A	-6.8	0.018	CD226	-3.98	< 0.001	ZNF471	-2.66	0.007	RP11-111A21.1	-2.5	0.017
S1 POSTc PLSM ST vs T0	LILRB1	-7.32	0.005	DLG2	-6.88	0.014	ZNF493	-2.4	0.012	CTD-2298J14.2	-4.85	0.003
S1 POSTc PLSM ST vs T0	GPI	2.66	0.002	DHX37	-7.11	0.01	SUPT3H	-2.66	0.008	SRP54-AS1	2.36	0.032
S1 POSTc PLSM ST vs T0	SLC1A5	4.03	< 0.001	CACNA1C	-6.8	0.018	IARS1	2.28	0.01	LINC02301	-3.53	< 0.001
S1 POSTc PLSM ST vs T0	FZR1	2.78	0.005	C12orf45	-2.34	0.007	POM121	1.98	0.024	FPGT-TNNI3K	-6.8	0.018
S1 POSTc PLSM ST vs T0	BBC3	5.9	< 0.001	UBE3B	-2.99	0.032	LONP1	2.52	0.007	RP11-270M14.4	-3.59	0.015
S1 POSTc PLSM ST vs T0	TGFB1	2.12	0.04	MIPOL1	-2.47	0.006	ZNF124	-4.25	0.007	PTCSC3	-3.56	0.037
S1 POSTc PLSM ST vs T0	DENND3	4.02	< 0.001	NUBPL	-3.79	0.024	TCF4	-3.8	0.003	LINC00648	-6.88	0.014
S1 POSTc PLSM ST vs T0	CYTH2	2.14	0.025	ANKAR	-5.06	0.001	DAPK1	-3.98	0.013	RP11-624L4.1	-1.96	0.041
S1 POSTc PLSM ST vs T0	RAB3D	-6.88	0.014	MFSD6	-4.04	0.012	ARID5A	3.11	0.001	RP11-346D14.1	-2.56	0.003
S1 POSTc PLSM ST vs T0	ARRDC2	2.31	0.012	FBXO4	-6.7	0.024	KPNA5	-2.12	0.016	LINC02254	-2.04	0.027
S1 POSTc PLSM ST vs T0	CRTC1	-3.56	0.037	DST	-4.67	0.004	FUT11	3.09	0.004	LINC02284	-6.7	0.024
S1 POSTc PLSM ST vs T0	NAMPT	1.9	0.031	KCNE4	-3.18	0.006	ZNF138	-2.38	0.017	NR4A1AS	5.67	< 0.001
S1 POSTc PLSM ST vs T0	PIK3CG	-3.29	0.013	SETBP1	-7.32	0.005	SERTAD1	4.2	< 0.001	PWRN1	-3.27	0.037
S1 POSTc PLSM ST vs T0	CPVL	-9.21	< 0.001	PDK1	2.27	0.019	MAFG	3.04	0.003	MIR762HG	-2.64	0.014
S1 POSTc PLSM ST vs T0	STX1A	4.68	0.008	SUV39H2	-6.88	0.014	GAL3ST4	-7.43	0.003	RP11-631M21.1	-6.8	0.018
S1 POSTc PLSM ST vs T0	MOSPD3	-3.72	0.03	DCLRE1C	-3.02	0.016	PGAP1	5.41	< 0.001	RP11-410C4.5	-3.75	0.003
S1 POSTc PLSM ST vs T0	IMPDH1	3.28	0.005	ZNF117	-3.48	0.047	ZNF257	-7.38	0.004	HERC2P5	-4.26	< 0.001
S1 POSTc PLSM ST vs T0	TMEM176B	-9.05	< 0.001	CENPH	-6.88	0.014	ADAM32	-2.21	0.012	LINC01572	-2.25	0.034
S1 POSTc PLSM ST vs T0	MPDZ	-7.11	0.01	BANK1	-6.88	0.014	SERPINA1	-6.72	< 0.001	BBS7-DT	-2.58	0.008
S1 POSTc PLSM ST vs T0	NPDC1	-2.87	0.009	NR4A2	2.48	0.007	UAP1L1	7.17	0.01	HERC2P8	-3.72	< 0.001
S1 POSTc PLSM ST vs T0	RAB11FIP2	-6.96	0.012	SCN3A	-6.88	0.014	BNIP3P1	4.51	< 0.001	LINC02605	-2.45	0.024
S1 POSTc PLSM ST vs T0	NPM3	-4.09	0.012	LINC00467	-4.04	0.012	OR6Y1	-1.97	0.046	RP11-96K19.4	-2.3	0.01
S1 POSTc PLSM ST vs T0	STN1	-5.22	< 0.001	UBP1	2.22	0.049	IRF1-AS1	2.04	0.036	LINC00662	-2.8	0.002
S1 POSTc PLSM ST vs T0	CCNY	-3.28	0.004	CEBPG	3.12	0.004	GZMM	-3.19	0.009	RP11-691G17.1	-2.11	0.022
S1 POSTc PLSM ST vs T0	RGS9	-3.48	0.047	MCOLN2	3.35	0.004	SIPA1L1	-4.78	0.003	TWSG1-DT	-2.33	0.013
S1 POSTc PLSM ST vs T0	PNPO	-4.34	0.012	ZUP1	7.27	0.008	PIGN	-3.32	< 0.001	RP11-192H23.5	3.19	0.037
S1 POSTc PLSM ST vs T0	ENO3	-7.25	0.006	SLC5A10	-4.56	0.007	HHLA3	-7.11	0.01	RP11-21J18.1	2.04	0.026
S1 POSTc PLSM ST vs T0	ABI3	-3.48	0.047	UBASH3B	-3.48	0.047	ZNF460	2.34	0.037	RP5-1028K7.2	-6.96	0.012
S1 POSTc PLSM ST vs T0	MAP2K6	-3.64	0.037	ROBO3	-7.32	0.005	PSAP	-2.45	0.005	RN7SL371P	-6.8	0.018
S1 POSTc PLSM ST vs T0	TMEM104	-6.96	0.012	ABCA9	-2.43	0.018	KLHDC1	-3.79	0.024	UXT-AS1	-3.56	0.037
S1 POSTc PLSM ST vs T0	ALDOC	3.26	< 0.001	ABCA6	-3.48	0.047	MDS2	-8.07	< 0.001	ZSCAN5A-AS1	-3.56	0.037
S1 POSTc PLSM ST vs T0	AREG	3.41	0.011	DISP1	-3.59	0.015	S100A6	-2.31	0.008	CTC-459F4.3	-2.54	0.027
S1 POSTc PLSM ST vs T0	MAPK10	-2.8	0.002	CNTNAP3B	-2.92	0.019	SNHG12	2.02	0.021	CTD-2369P2.8	5.19	0.001
S1 POSTc PLSM ST vs T0	SH3D19	2.82	0.037	PSMA8	-6.7	0.024	GRK6	-2.27	0.031	AC007192.4	-2.29	0.048
S1 POSTc PLSM ST vs T0	BST1	-3.64	0.037	BTG3	2.95	0.003	MARCHF5	2.74	0.012	IGFL2-AS1	-3.79	0.024
S1 POSTc PLSM ST vs T0	SNX25	-3.48	0.047	C21orf91	2.69	0.012	CSF2RA	-7.11	0.01	LINC00664	-3.72	0.03
S1 POSTc PLSM ST vs T0	SC5D	2.28	0.019	TSEN2	-2.9	0.01	PHETA1	-6.7	0.024	CTC-523E23.5	-2.54	0.038
S1 POSTc PLSM ST vs T0	MS4A6A	-5.98	< 0.001	CCDC174	2.16	0.015	MT1F	-7.38	0.004	AC005614.3	-2.09	0.024
S1 POSTc PLSM ST vs T0	RNF141	-3.98	0.013	ZNF18	-8.04	< 0.001	TXNRD1	-2.44	0.021	RP11-370I10.12	-3.07	< 0.001
S1 POSTc PLSM ST vs T0	C11orf21	-7.25	0.006	VOPP1	-2.39	0.021	FLVCR1-DT	-3.56	0.037	RP11-13J10.1	-2.85	0.002
S1 POSTc PLSM ST vs T0	CD69	3.66	< 0.001	APOOL	-4.09	0.012	ARMH1	-4.71	0.004	KCNQ1OT1	-2.26	0.009
S1 POSTc PLSM ST vs T0	CLEC2B	1.88	0.037	SAMSN1	1.92	0.031	FAM169A	-3.72	0.03	IGHV3-30	-3.45	< 0.001
S1 POSTc PLSM ST vs T0	SELPLG	-2.06	0.04	SLC7A7	-7.04	0.012	GK	6.12	< 0.001	CTC-523E23.11	-2.41	0.016
S1 POSTc PLSM ST vs T0	MVK	-3.56	0.037	MIER3	2.39	0.018	RYR3	-7.32	0.005	CCL5	-2.02	0.022
S1 POSTc PLSM ST vs T0	BIN2	-2.54	0.004	FLACC1	4.46	0.013	FICD	4.37	0.016	DCTN6-DT	-2.11	0.036
S1 POSTc PLSM ST vs T0	IL23A	3.47	0.004	PXYLP1	-3.85	0.02	ITPRIPL1	3.19	0.037	TAGAP-AS1	-2.67	0.005
S1 POSTc PLSM ST vs T0	RSRC2	2.03	0.019	RAB39B	3.29	0.03	SREBF2	2.04	0.029	RP11-423P10.2	-2.3	0.032
S1 POSTc PLSM ST vs T0	GLI1	7.27	0.008	ADAMTSL3	-2.93	0.002	DZIP3	-2.73	0.022	POM121C	2.05	0.02
S1 POSTc PLSM ST vs T0	GPN3	3.12	0.004	TIAM1	-2.59	0.013	DMD	-3.08	0.006	RP11-415F23.4	-6.7	0.024
S1 POSTc PLSM ST vs T0	GSG1	-2.81	0.049	PPP2R2B	-3.45	0.009	KIFBP	7.51	0.003	SAP30-DT	2.72	0.005
S1 POSTc PLSM ST vs T0	CDK2AP1	-2.09	0.043	TYSND1	-3.64	0.037	RNU5F-1	-6.88	0.014	RP11-517H2.6	-3.15	0.018
S1 POSTc PLSM ST vs T0	VDR	7.59	0.003	MS4A1	-3.85	0.02	RNY4P7	-6.88	0.014	RP11-50D16.4	-2.24	0.023
S1 POSTc PLSM ST vs T0	NUP107	-2.09	0.029	FBRS	2.29	0.018	Y_RNA	-6.8	0.018	FAM230J	-4.39	0.011
S1 POSTc PLSM ST vs T0	GAPDH	1.84	0.034	BRPF1	-5.29	< 0.001	INF2	-4.91	0.002	U2	-7.32	0.005
S1 POSTc PLSM ST vs T0	TPI1	2.55	0.003	NRG1	-6.7	0.024	OR2L2	-2.55	0.008	LINC02334	-3.33	0.003
S1 POSTc PLSM ST vs T0	SPSB2	3.75	0.002	GATAD1	-2.51	0.024	CR1	-5.14	0.001	ZNF658	-6.88	0.014
S1 POSTc PLSM ST vs T0	ENO2	2.9	< 0.001	DHRS4	-3.48	0.047	C6orf99	-7.18	0.008	TPTE	-6.96	0.012
S1 POSTc PLSM ST vs T0	PRKAB1	2.26	0.049	KCNJ15	-2.28	0.013	FCGR3A	-5.09	0.001	U2	-6.96	0.012
S1 POSTc PLSM ST vs T0	C2CD5	-2.51	0.017	AGAP1	-7.65	0.002	PCMTD2	-3.04	0.009	U2	-7.32	0.005
S1 POSTc PLSM ST vs T0	FRK	-2.99	< 0.001	DUSP2	3.56	< 0.001	LIME1	-2.76	0.02	RNU2-1	-3.64	0.037
S1 POSTc PLSM ST vs T0	DSE	-6.88	0.014	FAM86C1P	-7.04	0.012	OXLD1	-3.11	0.021	LINC01297	-7.96	< 0.001
S1 POSTc PLSM ST vs T0	CD83	2.05	0.034	CPA5	-5.58	< 0.001	SPIN3	-2.5	0.017	RNA5-8SN3	-3.39	< 0.001
S1 POSTc PLSM ST vs T0	VNN2	-4.78	0.003	DMTN	-7.38	0.004	HLA-DRA	-2.39	0.009	RP11-54H7.4	-2.66	0.04
S1 POSTc PLSM ST vs T0	GMNN	4.46	0.013	ADAMTS4	-3.45	0.004	EHMT2	-2.07	0.05	U2	-7.38	0.004
S1 POSTc PLSM ST vs T0	CCR6	-2.86	0.005	FCER1G	-3.86	< 0.001	LAYN	8.17	< 0.001	U2	-4.78	0.016
S1 POSTc PLSM ST vs T0	VEGFA	2.07	0.047	CSRP1	-8.59	< 0.001	SNHG32	1.82	0.037	CH17-373J23.1	-7.7	0.002
S1 POSTc PLSM ST vs T0	LAMA4	-3.49	0.003	BTG2	2.55	0.005	HSPA1B	6.15	< 0.001	IGKV1D-13	-3.72	0.03
S1 POSTc PLSM ST vs T0	LY86	-6.96	0.012	HK2	3.67	0.003	HSPA1A	4.62	< 0.001	RP11-108H9.1	-6.8	0.018
S1 POSTc PLSM ST vs T0	HARS2	-4.94	0.002	RGL4	-2.6	0.012	AIF1	-2.23	0.018	RP11-146E13.4	-3.12	0.003
S1 POSTc PLSM ST vs T0	NNT	-1.97	0.031	ADGRG5	-3.56	0.037	LST1	-2.63	0.005	SPANXA2-OT1	-2.29	0.013
S1 POSTc PLSM ST vs T0	HBEGF	5.3	< 0.001	CTBP1	-4.78	0.003	LILRB3	-3.56	0.037	5_8S_rRNA	-3.39	< 0.001
S1 POSTc PLSM ST vs T0	GZMK	-2.74	0.031	TCAF2P1	3.43	0.001	TRIM39	-3.48	0.047	FAM230A	-2.99	0.032
S1 POSTc PLSM ST vs T0	HAVCR1	-6.7	0.024	ZNF362	-6.88	0.014	HLA-J	2.85	0.002	U2	-7.25	0.006
S1 POSTc PLSM ST vs T0	MSH3	-2.04	0.047	ABCG1	-4.04	0.012	OR11A1	-2.3	0.022	GLIDR	-6.96	0.012
S1 POSTc PLSM ST vs T0	GABRG2	-2.41	0.01	TMPRSS3	2.81	0.018	OR14J1	-2.38	0.01	RNA5-8SN1	-3.39	< 0.001
S1 POSTc PLSM ST vs T0	POLR3G	-3.98	0.013	GAB3	-5.36	< 0.001	TCTN1	-2.51	0.009	IGLV2-8	-3.95	< 0.001
S1 POSTc PLSM ST vs T0	TARS1	2.72	0.003	ICOSLG	2.45	0.049	C2orf91	-3.56	0.037	RNA5-8SN2	-3.39	< 0.001
S1 POSTc PLSM ST vs T0	NUP155	-2.51	0.03	ZNF66	-2.15	0.018	REXO1L1P	-3.48	0.047	POTEB3	-7.18	0.008
S1 POSTc PLSM ST vs T0	SEC24A	4.47	< 0.001	C21orf58	-4.04	0.012	ARRDC5	-3.72	0.03	IGKV1D-12	-7.6	0.002
S1 POSTc PLSM ST vs T0	SELENOK	1.76	0.049	SIK3	-3.17	0.01	FAM230H	-4.54	< 0.001	RP11-67H24.3	-6.7	0.024
S1 POSTc PLSM ST vs T0	BCL6	2.82	0.037	CD3G	-3.19	< 0.001	HBA1	-8.15	< 0.001	CH507-513H4.1	-4.06	< 0.001
S1 POSTc PLSM ST vs T0	NPHP3	-2.38	0.042	IL6R	-2.68	0.01	MIR616	5.24	0.001	LINC01727	-2.73	0.015
S1 POSTc PLSM ST vs T0	FAM162A	2.02	0.031	FAM189B	-6.8	0.018	MT-TV	4.61	< 0.001	CTD-2144E22.9	-8.18	< 0.001
S1 POSTc PLSM ST vs T0	OGG1	-3.46	0.02	IER2	3.27	< 0.001	MT-TQ	-2.14	0.016	CH17-264L24.1	-2.8	0.012
S1 POSTc PLSM ST vs T0	PCCB	2.33	0.03	MGAT4B	-3.64	0.037	GNRHR2	-3.08	0.001	RP11-382B18.1	-2.84	0.002
S1 POSTc PLSM ST vs T0	ECT2	-6.8	0.018	PLXDC1	-3.64	0.037	IGKC	-4.65	< 0.001	RP11-426D19.1	-2.73	0.022
S1 POSTc PLSM ST vs T0	C3orf14	-3.48	0.047	SPC24	-6.96	0.012	IGKV4-1	-4.12	< 0.001	AP000432.3	-2.64	0.004
S1 POSTc PLSM ST vs T0	MRPL3	-1.98	0.037	WDR90	3.01	0.02	IGKV3D-20	-6.84	< 0.001	RP11-609N14.4	-2.04	0.028
S1 POSTc PLSM ST vs T0	ABCC5	-7.88	< 0.001	SLC25A45	-6.55	< 0.001	IGKV3D-11	-3.48	0.001	RP11-70L8.5	-2.66	0.04
S1 POSTc PLSM ST vs T0	DNAH1	-4.81	0.003	RPS6KA4	-6.96	0.012	IGLV4-69	-8.43	< 0.001	RP11-374N7.2	-3.79	0.024
S1 POSTc PLSM ST vs T0	CCL20	9.92	< 0.001	DHRS3	2.68	0.012	IGLV8-61	-4.88	0.002	RP11-624A21.1	-2.65	0.003
S1 POSTc PLSM ST vs T0	ITGA4	-2.15	0.039	TMCO4	-7.04	0.012	IGLV6-57	-5.71	< 0.001	RP11-334E15.1	-2.16	0.032
S1 POSTc PLSM ST vs T0	SPTBN1	-2.13	0.025	NFIA	-2.81	0.049	IGLV1-51	-3.98	0.001	RP3-466P17.3	-2.14	0.042
S1 POSTc PLSM ST vs T0	DOK1	-3.64	0.037	NEXN	-3.64	0.037	IGLV1-50	-3.63	0.013	LA16c-60D12.1	-2.25	0.022
S1 POSTc PLSM ST vs T0	POLE4	-2.12	0.049	HENMT1	-7.83	0.001	IGLV1-47	-5.8	< 0.001	RP11-438L7.1	-1.89	0.049
S1 POSTc PLSM ST vs T0	DNAH6	-3.56	0.037	GBP2	2.57	0.004	IGLV5-45	-3.32	0.032	IGHV1-69D	-3.92	0.016
S1 POSTc PLSM ST vs T0	EHBP1	-4.52	0.008	ATXN7L2	-6.88	0.014	IGLV1-44	-6.72	< 0.001	CH507-528H12.1	-3.46	< 0.001
S1 POSTc PLSM ST vs T0	IL1RL1	-7.18	0.008	GFI1	2.26	0.049	IGLV1-40	-4.45	< 0.001	LINC01232	-1.88	0.047
S1 POSTc PLSM ST vs T0	ABCB6	4.1	0.037	NLRP3	3.28	< 0.001	IGLV1-36	-3.29	0.013	EIF1B-AS1	-2.37	0.009
S1 POSTc PLSM ST vs T0	PASK	2.04	0.021	SLAMF6	-3.22	0.009	IGLV3-25	-3.85	0.02	GHET1	-3.79	< 0.001
S1 POSTc PLSM ST vs T0	TAF1B	2.22	0.049	FCGR3B	-7.32	0.005	IGLV2-23	-4.17	< 0.001	HELLPAR	-2.15	0.012
S1 POSTc PLSM ST vs T0	PLEKHB2	1.98	0.032	IER5	3.63	0.006	IGLV3-21	-3.29	0.004	ARRDC3-AS1	-2.09	0.03
S1 POSTc PLSM ST vs T0	ORC4	-2.49	0.004	KIAA1841	-3.64	0.037	IGLV3-19	-7.11	0.01	LINC00506	-2.85	0.001
S1 POSTc PLSM ST vs T0	ATF2	2	0.036	DISC1	-3.15	0.018	IGLV2-18	-3.41	0.024	SEPSECS-AS1	-2.39	0.008
S1 POSTc PLSM ST vs T0	NFE2L2	2.95	0.002	FBXO41	-3.56	0.037	IGLV2-14	-3.58	< 0.001	IGHV7-4-1	-6.8	0.018
S1 POSTc PLSM ST vs T0	EPHA4	-4.2	0.008	COQ8A	-3.85	0.02	IGLV2-11	-4.83	< 0.001	IGHV3-69-1	-7.04	0.012
S1 POSTc PLSM ST vs T0	SCP2	-2.42	0.011	CTSS	-2.37	0.008	IGLV3-10	-8.21	< 0.001	TCAF2C	3.63	0.006
S1 POSTc PLSM ST vs T0	TCEANC2	-2.85	0.015	IWS1	3.47	0.004	IGLV3-9	-8.46	< 0.001	RP11-298A10.3	3.81	< 0.001
S1 POSTc PLSM ST vs T0	SRSF4	1.91	0.047	S100A9	-9.99	< 0.001	IGLV3-1	-2.63	0.023	RP11-57A19.7	-2.64	0.027
S1 POSTc PLSM ST vs T0	DOCK7	-3.67	0.012	S100A12	-7.11	0.01	IGLC1	-5.06	< 0.001	RP11-419I17.1	-2.45	0.007
S1 POSTc PLSM ST vs T0	SRM	-3.48	0.047	ANTXR2	2.01	0.03	IGLC2	-3.73	< 0.001	RP11-340I6.13	-2.99	0.016
S1 POSTc PLSM ST vs T0	PRG4	-4.15	0.01	TRIM46	-4.34	0.012	IGLC3	-3.76	< 0.001	RP11-379B18.8	-2.79	0.003
S1 POSTc PLSM ST vs T0	NCF2	-4.25	0.007	FCRL1	-3.46	0.02	IGLC7	-7.25	0.006	XXbac-BPG171B11.8	-3.43	0.002
S1 POSTc PLSM ST vs T0	ADPRS	3.29	0.016	C4orf36	-2.15	0.037	IGHG4	-3.11	0.003	CCDC39	-3.46	0.02
S1 POSTc PLSM ST vs T0	RLF	2.49	0.022	CCNL1	1.77	0.044	IGHG2	-3.65	< 0.001	RP11-281A20.2	-3.72	0.03
S1 POSTc PLSM ST vs T0	ETV3	2.78	0.005	PLSCR2	-7.04	0.012	IGHG1	-3.64	< 0.001	RP11-397E7.6	-2.43	0.011
S1 POSTc PLSM ST vs T0	ID3	2.96	0.012	KIF15	-7.04	0.012	IGHG3	-2.57	0.004	XXbac-BPG254B15.11	4.13	0.003
S1 POSTc PLSM ST vs T0	SLC2A1	2.21	0.018	NMNAT3	-2.33	0.007	IGHM	-4.44	< 0.001	RP11-19D22.1	-2.26	0.018
S1 POSTc PLSM ST vs T0	ERI3	-3.92	0.016	RFT1	-7.83	0.001	IGHJ2	-6.96	0.012	RP11-172F7.1	-2.3	0.022
S1 POSTc PLSM ST vs T0	VAMP4	1.9	0.046	UVSSA	-3.6	0.002	IGHV1-2	-4.67	0.004	RP1-258E1.2	4.19	0.03
S1 POSTc PLSM ST vs T0	ATP10B	-1.96	0.049	ARHGEF3	-2.56	0.01	IGHV2-5	-3.62	0.005	RP11-139D23.7	-2.74	0.031
S1 POSTc PLSM ST vs T0	SGK1	3.16	< 0.001	ZNF691	-6.88	0.014	IGHV3-7	-4.27	< 0.001	RP11-661D17.1	-2.66	0.021
S1 POSTc PLSM ST vs T0	SLC16A7	-2.04	0.025	CCDC51	-6.96	0.012	IGHV3-11	-3.47	0.004	RP11-640I2.2	-2.69	0.007
S1 POSTc PLSM ST vs T0	TGIF2	2.09	0.021	INTU	-2.2	0.013	IGHV3-15	-4.43	0.011	BCL6-AS1	2.76	0.032
S1 POSTc PLSM ST vs T0	SPP1	-7.25	0.006	RNF123	4.87	0.004	IGHV3-21	-4.34	0.001	LINC02822	-4.32	< 0.001
S1 POSTc PLSM ST vs T0	PTPA	-2.5	0.017	MON1A	-6.88	0.014	IGHV3-23	-3.61	< 0.001	CH507-528H12.10	-8.4	< 0.001
S1 POSTc PLSM ST vs T0	HSDL2	-2.48	0.034	PPM1M	2.22	0.046	IGHV4-28	-3.37	0.027	RP11-686F15.4	-2.57	0.035
S1 POSTc PLSM ST vs T0	ALG2	3.13	0.015	CEP44	-2.82	0.028	IGHV3-33	-3.76	< 0.001	RP11-622O11.6	-2.62	0.006
S1 POSTc PLSM ST vs T0	CSF3R	-4.48	0.009	STARD4	4.15	< 0.001	IGHV4-34	-3.48	0.047	AC006115.7	-2.25	0.012
S1 POSTc PLSM ST vs T0	GPR68	4.87	< 0.001	PRIMPOL	-7.83	0.001	IGHV4-39	-4.24	0.002	DERPC	-3.72	0.03
S1 POSTc PLSM ST vs T0	COQ6	-4.78	0.003	SAMD3	-2.12	0.038	IGHV1-46	-7.92	< 0.001	CH507-528H12.12	-8.31	< 0.001
S1 POSTc PLSM ST vs T0	ATL2	-2.41	0.037	PI16	-5.22	< 0.001	IGHV3-48	-3.11	0.012	AC003099.2	-3.02	< 0.001
S1 POSTc PLSM ST vs T0	IFIT3	3.48	< 0.001	SYTL3	2.89	0.001	IGHV5-51	-2.7	0.036	CH507-528H12.3	-3.92	0.016
S1 POSTc PLSM ST vs T0	MXI1	2.57	0.01	KCNV1	-2.63	0.011	IGHV3-53	-4.48	0.009	CH507-513H4.7	-3.92	0.016
S1 POSTc PLSM ST vs T0	GOT1	2.77	0.024	CSMD3	-7.74	0.001	IGHV4-61	-4.34	0.001	VIM2P	-2.31	0.021
S1 POSTc PLSM ST vs T0	TEK	-6.96	0.012	FASTK	-1.93	0.039	IGHV3-66	-7.11	0.01	RP11-686O6.3	3.73	0.004
S1 POSTc PLSM ST vs T0	CYSTM1	2.5	0.027	TMEM67	-3.92	0.016	IGHV1-69	-7.38	0.004	CH507-513H4.10	-8.46	< 0.001
S1 POSTc PLSM ST vs T0	MTRF1	-4.13	0.003	SYK	-4.39	0.011	RNY4P18	-7.25	0.006	CH507-528H12.4	-3.92	0.016
S1 POSTc PLSM ST vs T0	HSPH1	2.19	0.018	RASEF	-5.34	< 0.001	LINC01089	-3.79	0.024	RP11-510D4.1	-2.61	0.008
S1 POSTc PLSM ST vs T0	TGFBI	-8.49	< 0.001	DYNLT3	2.55	0.016	LPAL2	-2.95	0.003	CTB-53D8.2	-3.44	< 0.001
S1 POSTc PLSM ST vs T0	KDM3B	-4.97	0.002	MID1IP1	-7.43	0.003	RP11-306O13.1	-2.13	0.035	RP11-454P7.5	-3.58	< 0.001
S1 POSTc PLSM ST vs T0	EGR1	7.48	< 0.001	AQP3	-2.44	0.012	CRIP1	-1.81	0.041	RP11-2G16.1	-2.96	0.012
S1 POSTc PLSM ST vs T0	DUSP4	2.48	0.013	MELK	-6.88	0.014	ARHGAP19	-7.43	0.003	RP11-391D19.1	-3.63	0.013
S1 POSTc PLSM ST vs T0	SORBS3	-4.04	0.012	INTS6L	-3.56	0.037	HAUS7	-2.79	0.014	RP11-816B18.1	-3.36	< 0.001
S1 POSTc PLSM ST vs T0	EPHX2	-5.73	< 0.001	TSHR	-2.2	0.025	ERV3-1	-2.62	0.047	RP4-738P15.7	-2.99	0.002
S1 POSTc PLSM ST vs T0	LYPLA1	-2.34	0.04	CFL2	-3.48	0.047	FIRRE	-3.48	0.047	RP11-56L13.8	-7.88	< 0.001
S1 POSTc PLSM ST vs T0	AKAP1	-2.56	0.023	FAAH2	2.66	0.016	PPM1N	-7.65	0.002	RP1-199L16.2	-2.55	0.004
S1 POSTc PLSM ST vs T0	TRIM25	2.77	0.005	DDX21	1.86	0.036	GALT	-2.46	0.012	RP3-487J7.4	-2.64	0.005
S1 POSTc PLSM ST vs T0	SCPEP1	-2.38	0.042	ARHGEF40	-6.88	0.014	TAX1BP3	-7.49	0.003	RP11-2B2.1	-3.21	0.004
S1 POSTc PLSM ST vs T0	TEX14	-4.2	0.008	C12orf50	-2.44	0.008	AP1G2	-2.01	0.037	RP11-237N2.1	-2.47	0.005
S1 POSTc PLSM ST vs T0	ECHDC2	-3.01	0.01	ZFYVE1	2.95	0.024	TSPAN4	2.25	0.027	CTD-2215E18.4	-3.65	< 0.001
S1 POSTc PLSM ST vs T0	PLBD1	-6.7	0.024	AGBL2	-6.96	0.012	ARL16	-2.39	0.012	RP11-725P16.3	-3.79	< 0.001
S1 POSTc PLSM ST vs T0	ZNF211	4.74	0.007	CACNB2	-2.42	0.016	SCART1	-7.18	0.008	RP11-490F3.3	-2.78	0.001
S1 POSTc PLSM ST vs T0	CSTA	-7.6	0.002	ARL5B	3.08	0.047	GTF2IRD2P1	-3.64	0.037	RP11-58N22.1	-2.27	0.042
S1 POSTc PLSM ST vs T0	TNFSF10	-2.99	0.032	TAF1D	2.87	< 0.001	LINC01588	-2.32	0.036	RP4-660H19.2	-3.63	0.013
S1 POSTc PLSM ST vs T0	CSMD2	-7.11	0.01	RAB8B	3.19	0.001	COL28A1	-2.51	0.012	RP11-645I23.1	-2.23	0.023
S1 POSTc PLSM ST vs T0	MTERF4	1.83	0.049	POTED	-6.8	0.018	RP11-1023L17.1	-2.38	0.042	RP4-592A1.5	-2.74	0.004
S1 POSTc PLSM ST vs T0	ODF2L	-1.81	0.04	IFTAP	-2.04	0.023	LINC02649	4.24	0.002	CTA-392G7.1	-4.31	0.001
S1 POSTc PLSM ST vs T0	RPAP2	-2.33	0.008	RIC3	-2.93	0.012	DHRS4-AS1	-2.3	0.018	RP11-76P17.4	-2.53	0.007
S1 POSTc PLSM ST vs T0	NT5C3A	2.74	0.003	ZMAT1	-3.92	0.002	FAM230B	-4.43	0.011	RP1-274L7.5	-2.67	0.002
S1 POSTc PLSM ST vs T0	GLIPR2	-3.13	0.005	TRIM66	-7.49	0.003	IFI30	-2.47	0.029	RP11-362H12.2	-2.27	0.042
S1 POSTc PLSM ST vs T0	CALD1	4.37	0.016	TMED3	-2.4	0.021	CCDC7	-4.04	0.004	RP11-205A6.1	-3.48	0.047
S1 POSTc PLSM ST vs T0	EGR2	10.98	< 0.001	TMEM135	-3.59	0.015	RP11-465B22.3	3.88	< 0.001	RP3-425C14.8	-2.45	0.012
S1 POSTc PLSM ST vs T0	P4HA1	4.48	< 0.001	CENPV	-7.11	0.01	LINC00339	-3.55	0.018	RP11-799O21.2	-2.21	0.012
S1 POSTc PLSM ST vs T0	NR4A1	4.92	< 0.001	CIAO2B	2.2	0.013	MIF-AS1	1.81	0.044	RP11-404C6.6	-2.62	0.003
S1 POSTc PLSM ST vs T0	SMUG1	-7.18	0.008	PCLAF	-3.48	0.008	FAM228B	-2.35	0.008	AC006296.4	-3.59	0.001
S1 POSTc PLSM ST vs T0	RAB9A	2.89	0.032	NAB2	3.01	0.02	ZNF880	-7.32	0.005	RP11-154D6.3	-2.77	0.006
S1 POSTc PLSM ST vs T0	G0S2	-2.44	0.037	ATP23	-2.38	0.011	OR2A25	-3.72	0.03	CTD-2007H18.2	-2.33	0.013
S1 POSTc PLSM ST vs T0	COQ8B	-4.41	0.001	MTMR10	-3.46	0.02	XKR9	-2.95	0.002	RP11-335E8.3	-2.2	0.026
S1 POSTc PLSM ST vs T0	2002-08-01	2.36	0.012	MS4A7	-6.7	0.024	RNU2-2P	-7.11	0.01	RP1-81D8.7	-2.29	0.013
S1 POSTc PLSM ST vs T0	FASTKD3	-3.98	0.013	MARS1	2.19	0.014	AC007879.5	2.99	0.013	RP11-812F18.1	-4.04	0.012
S1 POSTc PLSM ST vs T0	CDKN1A	3.52	< 0.001	B4GALNT2	-4.2	0.008	CCDC18-AS1	-2.04	0.02	RP11-178F10.5	-2.34	0.024
S1 POSTc PLSM ST vs T0	SOX4	-2.82	0.016	HDHD2	-2.66	0.044	EFCAB6-AS1	-2.23	0.017	RP11-506N21.1	-1.96	0.032
S1 POSTc PLSM ST vs T0	CPNE5	-3.64	0.037	PROCA1	-6.8	0.018	OSER1-DT	-3.57	0.005	RP11-667L17.1	-2.51	0.03
S1 POSTc PLSM ST vs T0	RPP40	-3.92	0.016	TP53I13	4.37	0.016	RP11-33A14.1	-7.04	0.012	RP11-279E17.1	-4.71	0.004
S1 POSTc PLSM ST vs T0	DEK	1.82	0.038	SERTAD3	4.19	0.03	ROR1-AS1	-1.86	0.049	RP11-702N8.3	-2.42	0.006
S1 POSTc PLSM ST vs T0	AHNAK	-3.14	0.001	WDR81	-7.05	0.01	IGKV3D-15	-5.61	< 0.001	RP11-371H1.1	-3.71	0.011
S1 POSTc PLSM ST vs T0	CLYBL	-3.85	0.007	CDK2AP2	2.72	0.004	SLC44A3-AS1	-7.79	0.001	RP11-513H8.2	-2.8	0.009
S1 POSTc PLSM ST vs T0	IRF1	2.65	0.002	TK1	-3.92	0.016	RP11-191L9.4	-3.72	0.03	RP11-363F12.1	-3.64	0.037
S1 POSTc PLSM ST vs T0	MSTO1	-2.49	0.026	TMEM68	2.78	0.009	IGHV4-59	-3.6	0.005	RP11-686L6.1	-2.57	0.035
S1 POSTc PLSM ST vs T0	MBOAT7	5.33	< 0.001	TMEM99	-3.22	0.009	LINC00539	-6.88	0.014	RP11-220I15.1	-2.72	0.005
S1 POSTc PLSM US vs T0	TMEM176A	-3.77	0.032	DTD1	-2.8	0.042	MRPL1	2.5	0.016	IGHV3-72	-6.73	0.032
S1 POSTc PLSM US vs T0	TFPI	-2.56	0.009	TBC1D20	2.31	0.022	SNUPN	2.16	0.043	AC074289.1	-4.49	0.001
S1 POSTc PLSM US vs T0	RHBDD2	2.22	0.019	HCST	-2.58	0.007	SCN9A	-2.96	0.049	TSBP1-AS1	-1.9	0.045
S1 POSTc PLSM US vs T0	ARHGAP44	-6.73	0.032	ZNF384	-3.38	0.043	CD52	-3.1	< 0.001	CTA-292E10.6	2.4	0.032
S1 POSTc PLSM US vs T0	PROM1	-6.82	0.026	PLEKHG3	-2.51	0.022	HTRA4	-2.41	0.043	SNORD57	5.68	< 0.001
S1 POSTc PLSM US vs T0	GAS7	-6.91	0.02	EVI2A	2.36	0.01	ASPSCR1	-3.7	0.04	ITGB2-AS1	-4.97	0.001
S1 POSTc PLSM US vs T0	CD79B	-2.66	0.025	SLC10A3	-7.62	0.003	ROBO1	-7.28	0.008	LINC01630	-7.28	0.008
S1 POSTc PLSM US vs T0	MYLIP	-3.15	0.01	HIVEP3	-6.91	0.02	FAM153A	-5.42	< 0.001	RP11-165F24.3	-4.31	0.008
S1 POSTc PLSM US vs T0	NADK	-4.26	0.009	IDUA	-6.82	0.026	SLC16A5	-3.84	0.027	RP11-300M24.1	-2.46	0.04
S1 POSTc PLSM US vs T0	CRY1	2.36	0.013	KDM4B	7.81	0.002	ADPRM	2.35	0.019	RP13-188A5.1	-2.91	0.005
S1 POSTc PLSM US vs T0	ETV7	7.48	0.006	FGL2	-3.77	0.032	CDK1	-7.99	0.001	SPAG5-AS1	3.86	0.002
S1 POSTc PLSM US vs T0	MKS1	-2.66	0.028	ATF4	1.88	0.043	FRMPD2	-6.82	0.026	RP11-301G19.1	-2.82	0.002
S1 POSTc PLSM US vs T0	PLAUR	-5.4	< 0.001	FOXP2	-7.67	0.002	FOS	-4.22	< 0.001	TARID	4.04	0.049
S1 POSTc PLSM US vs T0	QPCTL	2.18	0.039	IRF5	-4.01	0.007	SETMAR	-2.42	0.026	LINC01515	-3.28	0.05
S1 POSTc PLSM US vs T0	TYROBP	-8.06	< 0.001	ARHGAP22	-2.48	0.041	CD14	-7.72	0.002	AC003991.3	-3.96	< 0.001
S1 POSTc PLSM US vs T0	BRCA1	-3.84	0.027	CHAC1	4.04	0.049	MZB1	-2.78	0.008	OR2M3	-2.82	0.002
S1 POSTc PLSM US vs T0	NUB1	2.22	0.016	PALLD	-4.09	0.016	GTSF1	-6.91	0.02	CCT6P1	4.01	0.001
S1 POSTc PLSM US vs T0	CAPN1	-2.74	0.019	CD68	-2.91	0.03	DPY19L2P2	-2.65	0.013	RP11-110G21.1	-3.84	0.027
S1 POSTc PLSM US vs T0	BID	-2.53	0.035	SYT5	-7.14	0.01	MTSS1	-3.84	0.027	AC010745.2	-3.13	0.002
S1 POSTc PLSM US vs T0	CD74	-2.45	0.007	NXNL2	-2.73	0.032	TPT1-AS1	2.07	0.044	SEPTIN7-DT	-7.21	0.008
S1 POSTc PLSM US vs T0	NLRP2	-3.87	< 0.001	SNX9	3.41	0.001	CLCN5	-6.73	0.032	UBAC2-AS1	-3.98	0.022
S1 POSTc PLSM US vs T0	GRN	-5.49	< 0.001	RTN4IP1	-7.28	0.008	ZNF581	2.42	0.027	VDAC1P8	4.31	0.027
S1 POSTc PLSM US vs T0	TMSB10	-1.88	0.04	MTRES1	4.62	0.011	HOPX	-2.24	0.029	CCDC26	-1.95	0.049
S1 POSTc PLSM US vs T0	CYP46A1	-2.68	0.007	STK33	-2.24	0.044	ANO5	-7.9	0.001	TTTY10	-3.48	< 0.001
S1 POSTc PLSM US vs T0	VCAN	-9.43	< 0.001	SSBP4	-7.4	0.006	NINJ2	-4.09	0.016	SNHG31	-2.69	0.006
S1 POSTc PLSM US vs T0	ZFYVE16	2.32	0.037	HIP1R	4.04	0.049	RRM2	-4.04	0.019	HLA-DRB6	-7.46	0.005
S1 POSTc PLSM US vs T0	CTNS	-6.73	0.032	LILRB2	-7.4	0.006	MAL	-1.93	0.039	AJ006998.2	-4.36	0.008
S1 POSTc PLSM US vs T0	PARP3	-4.21	0.011	ACSS2	-3.77	0.032	USP19	3.16	0.026	PATL2	-1.94	0.043
S1 POSTc PLSM US vs T0	THAP3	4.12	0.003	ZNF227	2.72	0.013	CLEC7A	-8.1	< 0.001	MIR181A1HG	-6.99	0.016
S1 POSTc PLSM US vs T0	SPATA7	-7.72	0.002	NAPSB	-7.94	0.001	SPTLC3	-3.05	0.002	ELOVL2-AS1	-5.38	< 0.001
S1 POSTc PLSM US vs T0	CAPG	-9.73	< 0.001	C1orf159	-7.4	0.006	OR5A1	-2.34	0.02	AC159540.1	-2.31	0.016
S1 POSTc PLSM US vs T0	TRIT1	4.15	0.001	THOC6	-4.16	0.004	C2CD2L	-3.7	0.04	LINC02558	-2.87	0.008
S1 POSTc PLSM US vs T0	CUL7	-4.15	0.013	CA6	-5.06	< 0.001	ARNT2	-7.14	0.01	AC002451.3	-3.74	0.002
S1 POSTc PLSM US vs T0	SCML1	4.55	0.013	GCH1	4.55	0.013	HCFC1	-2.48	0.049	HLA-DPA1	-2.5	0.013
S1 POSTc PLSM US vs T0	HDAC9	-7.57	0.003	ENOSF1	-2.12	0.04	CTSW	-3.57	< 0.001	RP3-428L16.1	-7.52	0.004
S1 POSTc PLSM US vs T0	PER3	-4.26	0.009	TRIM5	2.28	0.021	SLFN11	3.78	0.002	SILC1	-2.25	0.016
S1 POSTc PLSM US vs T0	HERPUD1	1.89	0.049	RAP1GAP2	-8.51	< 0.001	LRRC20	-6.73	0.032	IGHV3-43	-3.24	0.023
S1 POSTc PLSM US vs T0	RAD51	-7.14	0.01	GRSF1	3.19	0.006	CFL1	-2.21	0.016	LINC00342	-2.21	0.019
S1 POSTc PLSM US vs T0	GATB	-7.34	0.007	JCHAIN	-4.28	< 0.001	RAB37	-6.74	< 0.001	SNHG7	3.03	0.002
S1 POSTc PLSM US vs T0	GNA15	3.01	0.028	ATP8A2	-7.07	0.013	CES2	-2.77	0.048	LINC01722	-3.17	0.004
S1 POSTc PLSM US vs T0	QSER1	-3.77	0.032	TBC1D8B	-2.57	0.006	DELEC1	-5.25	< 0.001	CCDC144NL-AS1	-2.76	0.016
S1 POSTc PLSM US vs T0	LTK	-6.73	0.032	SLC39A11	-6.99	0.016	ESRRA	4.04	0.049	AC007743.1	-2.5	0.007
S1 POSTc PLSM US vs T0	ELMO2	2.07	0.04	LARGE1	-4.26	0.009	MTX1	-3.32	0.018	SLC26A4-AS1	-2.33	0.015
S1 POSTc PLSM US vs T0	SLC6A16	-4.04	0.019	SLC2A11	-3.23	0.002	PARP15	-2.18	0.025	LERFS	-7.34	0.007
S1 POSTc PLSM US vs T0	LIMCH1	-7.4	0.006	DYDC2	-4.4	0.007	MAB21L3	-2.05	0.023	LINC02817	-4.7	0.003
S1 POSTc PLSM US vs T0	TSPAN32	-4.77	0.002	HSD17B4	-2.09	0.037	MAP3K11	-4.09	0.016	MIR155HG	4.68	0.009
S1 POSTc PLSM US vs T0	CNN2	-2.5	0.007	MEN1	-4.36	0.008	KCNK7	-6.99	0.016	HIPK1-AS1	-3.91	0.027
S1 POSTc PLSM US vs T0	ASPM	-6.91	0.02	ELP3	-2.3	0.032	PEAK1	-2.28	0.039	FBXO30-DT	-2.11	0.026
S1 POSTc PLSM US vs T0	CD84	-2.41	0.034	LDHA	2.52	0.005	CEP83	-7.99	0.001	OLMALINC	-2.6	0.004
S1 POSTc PLSM US vs T0	FGFR2	-6.99	0.016	IL15RA	7.4	0.007	SULT1B1	-2.02	0.032	RBMS3-AS3	-2.85	0.008
S1 POSTc PLSM US vs T0	ATP11A	-7.28	0.008	YARS1	2.82	0.003	JUP	-6.82	0.026	AC018816.3	-4.04	0.019
S1 POSTc PLSM US vs T0	ABCC9	-2.81	0.003	CD36	-6.99	0.016	HRAS	-3.7	0.04	RP11-795J1.1	-3.7	0.04
S1 POSTc PLSM US vs T0	CLEC2D	1.84	0.048	HILPDA	9.43	< 0.001	PDZK1	-3.77	0.032	ANKRD20A7P	-7.86	0.001
S1 POSTc PLSM US vs T0	NEDD4	-2.5	0.012	PRR5L	-4.94	0.001	ADGRE1	-7.77	0.002	NIFK-AS1	4.74	< 0.001
S1 POSTc PLSM US vs T0	PTPN3	-7.14	0.01	DNAJB2	2.56	0.009	CTBP2	-3.7	0.04	AL163953.3	-7.21	0.008
S1 POSTc PLSM US vs T0	ARHGAP10	-7.46	0.005	TSGA10	-3.39	0.014	DDIT3	3.84	< 0.001	RP11-554F20.1	-2.17	0.033
S1 POSTc PLSM US vs T0	HLTF	2.56	0.04	TGFBRAP1	-3.77	0.032	TBC1D10C	-2.18	0.032	LINC01684	-2.97	0.004
S1 POSTc PLSM US vs T0	NFATC3	-1.93	0.048	USP44	3.49	0.006	UCP2	-2.4	0.011	AC073130.1	-3.76	0.002
S1 POSTc PLSM US vs T0	PTGS2	-7.21	0.008	MYO1G	-2.5	0.02	LINC02694	-2.07	0.041	LINC01410	-5.03	0.001
S1 POSTc PLSM US vs T0	ACTB	-2.47	0.006	SCN2A	-3.28	0.05	IP6K1	4.62	0.011	RNY4P25	-7.21	0.008
S1 POSTc PLSM US vs T0	XAB2	4.04	0.049	SKIL	2.58	0.009	BNIP3	3.87	< 0.001	ST3GAL6-AS1	-2.97	0.008
S1 POSTc PLSM US vs T0	RBFOX1	-6.73	0.032	IL1RN	-6.99	0.016	RTTN	-2.44	0.014	IGKV2D-30	-2.95	0.027
S1 POSTc PLSM US vs T0	RUNX1T1	-7.82	0.002	LRRC8A	-3.84	0.027	OR5AN1	-3.44	0.006	IGKV1-6	-2.96	0.049
S1 POSTc PLSM US vs T0	FKBP7	-7.72	0.002	KLF4	-7.4	0.006	OR51L1	-4.21	0.011	IGKV3-20	-2.92	0.003
S1 POSTc PLSM US vs T0	OPHN1	-1.95	0.036	ZNF189	4.14	0.04	TYMS	-4.87	0.002	LILRA2	-6.99	0.016
S1 POSTc PLSM US vs T0	SLC4A4	-7.72	0.002	ANP32B	1.92	0.044	FAM210A	2.81	0.008	IGKV2-24	-6.82	0.026
S1 POSTc PLSM US vs T0	MEF2C	-8.65	< 0.001	IL11RA	-2.61	0.016	HIC1	7.23	0.01	IGKV3-11	-3.21	0.002
S1 POSTc PLSM US vs T0	P2RX5	-4.77	0.002	CPEB2	-7.67	0.002	TGIF1	2.09	0.037	LINC01192	-3.21	0.026
S1 POSTc PLSM US vs T0	TDRD3	-4.86	< 0.001	PRCP	-2.85	0.008	JUN	-2.8	0.003	RPS15AP24	2.56	0.024
S1 POSTc PLSM US vs T0	ZNF324	-6.73	0.032	YAP1	-7.21	0.008	PNPLA2	3.09	0.031	ZBTB20-AS1	-3.62	0.049
S1 POSTc PLSM US vs T0	SLCO1A2	-2.84	0.037	RDX	2.07	0.032	AGTRAP	-2.4	0.031	XACT	-2.28	0.011
S1 POSTc PLSM US vs T0	FCN1	-4.56	0.001	CTDSPL2	2.17	0.026	NAALADL2	-7.07	0.013	IGKV1-9	-3.15	0.01
S1 POSTc PLSM US vs T0	RAD54L	4.47	0.019	NUSAP1	-4.73	0.003	CD151	-4.84	0.002	C8orf58	-3.77	0.032
S1 POSTc PLSM US vs T0	FOLH1	-6.73	0.032	KNL1	-7.14	0.01	ZNF518A	-3.32	0.018	CTC-340A15.2	-2.8	0.003
S1 POSTc PLSM US vs T0	LAT2	-8.02	< 0.001	PARP6	-3.02	0.021	ZC3H12D	2.52	0.006	IGKV1-39	-3.5	0.001
S1 POSTc PLSM US vs T0	NOX4	-3.7	0.04	PLCB2	-4.91	< 0.001	2001-01-01	-6.91	0.02	LINC01206	-2.76	0.003
S1 POSTc PLSM US vs T0	GNAO1	2.83	0.043	SLC28A2	-2.49	0.032	ERBB4	-6.99	0.016	LINC00960	-2.88	0.032
S1 POSTc PLSM US vs T0	L2HGDH	-2.01	0.043	ADCY3	-3.7	0.04	PARP10	-6.91	0.02	IGKV2D-28	-5.47	< 0.001
S1 POSTc PLSM US vs T0	KLHL42	-7.46	0.005	DTNB	3.05	0.018	MAGED1	-2.48	0.029	HLA-DMB	-3.87	< 0.001
S1 POSTc PLSM US vs T0	SULT2B1	4.4	0.022	IDH1	-3.7	0.04	HLA-DQB1	-2.61	0.005	IGKV3-7	-3.84	0.027
S1 POSTc PLSM US vs T0	LZTS3	7.23	0.01	ITPRID2	-4.62	0.003	TSHZ1	7.62	0.003	IGKV2-30	-2.84	0.037
S1 POSTc PLSM US vs T0	SIRPG	-5.98	< 0.001	PPCDC	-4.04	0.019	PSTK	-3.7	0.04	IGKV1-5	-3.81	< 0.001
S1 POSTc PLSM US vs T0	P2RX7	-3.7	0.04	GUCD1	-2.86	0.01	SLC9A4	-3.47	< 0.001	WDR86-AS1	-3.91	0.027
S1 POSTc PLSM US vs T0	SLC23A2	-2.88	0.032	SLC7A1	3.36	0.001	PRF1	-2.23	0.02	MRPS6	1.95	0.035
S1 POSTc PLSM US vs T0	ARHGAP4	-2.3	0.014	TARBP2	-4.87	0.002	SLC36A4	2.95	0.032	ZNF512	-5.73	< 0.001
S1 POSTc PLSM US vs T0	SPTLC1	-2.63	0.041	RTN1	-6.99	0.016	CAPS2	-3.98	0.022	IGKV2-28	-5.42	< 0.001
S1 POSTc PLSM US vs T0	LYZ	-6.9	< 0.001	SLC24A4	-6.73	0.032	FAM83H	-3.84	0.027	LINC01322	-4.45	0.006
S1 POSTc PLSM US vs T0	ZNF268	-3.2	0.013	POLG	-3.39	0.007	ZNF322	7.55	0.004	IGKV3-15	-2.66	0.008
S1 POSTc PLSM US vs T0	AARS1	2.56	0.006	NTRK3	-3.33	0.043	OR5AS1	-2.73	0.004	HBB	-7.46	0.005
S1 POSTc PLSM US vs T0	PITPNM2	-6.73	0.032	FURIN	2.72	0.008	FAM153B	-4.49	0.005	LINC00461	-6.91	0.02
S1 POSTc PLSM US vs T0	EXOC1	2.37	0.035	ITGAX	-3.62	0.049	PLCB1	-4.87	0.002	EXTL3-AS1	-4.31	0.008
S1 POSTc PLSM US vs T0	NRCAM	-6.73	0.032	MYLK3	-2.22	0.047	POTEC	-3.95	0.001	MIR210HG	5.54	< 0.001
S1 POSTc PLSM US vs T0	SEL1L3	-2.91	0.014	G6PC3	-7.14	0.01	BCOR	5.89	< 0.001	CTD-2260A17.2	-3.28	0.05
S1 POSTc PLSM US vs T0	CLSPN	-6.82	0.026	BCAS3	-2.34	0.043	OR56A4	-3.77	< 0.001	RP11-373N22.3	-2.36	0.009
S1 POSTc PLSM US vs T0	CDC45	-6.91	0.02	ASXL3	-7.34	0.007	HMCES	3.12	0.003	ZBED5-AS1	-5.64	< 0.001
S1 POSTc PLSM US vs T0	ADA2	-2.56	0.008	SLC14A1	-3.84	0.027	RFLNB	-7.34	0.007	CTC-441N14.2	-4.38	0.002
S1 POSTc PLSM US vs T0	CDC23	2.95	0.032	TMC6	-2.11	0.032	SDR42E2	-7.57	0.003	LINC00504	-2.15	0.02
S1 POSTc PLSM US vs T0	WHRN	3.22	0.007	SLC16A3	2.97	0.014	ACTG1	-2.21	0.014	RP11-553P9.2	-7.28	0.008
S1 POSTc PLSM US vs T0	CREM	3.99	< 0.001	SECTM1	4.04	0.049	OR1D2	-3	0.006	FMN1	-4.04	0.019
S1 POSTc PLSM US vs T0	IL12RB1	-5.45	< 0.001	FBXO15	-2.54	0.009	TSPYL2	2.41	0.011	LINC01088	-2.11	0.031
S1 POSTc PLSM US vs T0	ACOT7	-7.67	0.002	PRDM15	4.12	0.003	PLA2G6	-4.36	0.008	UGDH-AS1	-2.79	0.003
S1 POSTc PLSM US vs T0	PCSK5	-2.61	0.013	IFITM3	-1.97	0.048	THAP7	2.71	0.015	RP4-539M6.19	2.83	0.043
S1 POSTc PLSM US vs T0	MARCHF2	-6.99	0.016	SCYL1	8.03	0.001	WDR27	4.17	0.003	LINC02503	-3.23	< 0.001
S1 POSTc PLSM US vs T0	LZTR1	-2.04	0.05	ADAMTS10	-3.62	0.049	PIWIL3	-6.73	0.032	LINC02465	-6.82	0.026
S1 POSTc PLSM US vs T0	CECR2	-6.73	0.032	NLRP12	-7.21	0.008	MED12	2.81	0.012	RP11-346J10.1	-7.34	0.007
S1 POSTc PLSM US vs T0	LGALS2	-7.14	0.01	CARM1	-3.91	0.027	SATL1	-2.58	0.021	RP11-381K20.2	-2.96	0.004
S1 POSTc PLSM US vs T0	LGALS1	-2.09	0.027	PLK4	-7.46	0.005	BRF1	3.35	0.016	LINC02762	-4.62	0.003
S1 POSTc PLSM US vs T0	TPTEP1	-2.74	0.008	GPR161	-6.73	0.032	SEMA4B	-4.09	0.016	RP11-4O3.1	-3.34	0.009
S1 POSTc PLSM US vs T0	JOSD1	2.5	0.016	PFDN2	2.7	0.013	GP1BA	7.55	0.004	LINC02197	-2.7	0.032
S1 POSTc PLSM US vs T0	FAM118A	1.96	0.05	FCRL5	-3.31	0.006	KLHL33	-2.41	0.013	LINC01182	-7.4	0.006
S1 POSTc PLSM US vs T0	POLR3H	-4.09	0.016	MRPL24	-2.46	0.04	METTL7A	-2.47	0.032	RP11-37B2.1	-2.94	0.002
S1 POSTc PLSM US vs T0	GSTZ1	-6.82	0.026	TARS2	-3.71	0.006	MUC1	-8.02	< 0.001	LINC02475	-3.98	0.022
S1 POSTc PLSM US vs T0	ZFYVE21	-6.99	0.016	MINDY1	-7.21	0.008	DNAH14	-7.4	0.006	RP11-484O2.1	-3.02	0.014
S1 POSTc PLSM US vs T0	ZC3H14	2.98	0.005	ATP8B2	-2.66	0.01	NKAIN3	-2.44	0.008	IGKV1D-39	-3.5	0.001
S1 POSTc PLSM US vs T0	CDC25B	-2.78	0.016	S100A8	-11.44	< 0.001	GOLGA8R	-6.82	0.026	LINC02241	-4.66	0.003
S1 POSTc PLSM US vs T0	CST3	-9.62	< 0.001	PSEN2	-3.19	0.001	ZNF197	-3.98	0.022	RNY4	-8.24	< 0.001
S1 POSTc PLSM US vs T0	CELF4	-6.82	0.026	PPFIA4	8.35	< 0.001	ANKRD20A5P	-6.99	0.016	LINC01609	-2.94	0.003
S1 POSTc PLSM US vs T0	SMCHD1	1.98	0.032	MEIS1	-4.36	0.008	SMIM29	1.92	0.048	RP11-566H8.3	-2.6	0.026
S1 POSTc PLSM US vs T0	NOL4	-7.52	0.004	EXOC6B	-6.91	0.02	OR10H1	-8.1	< 0.001	RP11-473J6.1	-2.79	0.011
S1 POSTc PLSM US vs T0	MCF2	-6.99	0.016	SCN1A	-7.82	0.002	SPIN2B	2.95	0.032	CTA-398F10.1	-2.81	0.007
S1 POSTc PLSM US vs T0	ELF4	-3.26	0.01	ANKMY1	-4.36	0.008	CXCR3	-6.82	0.026	RP11-61L23.2	3.31	< 0.001
S1 POSTc PLSM US vs T0	EMD	2.4	0.016	EAF2	-3.62	0.049	LILRB4	-4.7	0.003	RP11-17A4.2	-2.63	0.006
S1 POSTc PLSM US vs T0	KATNAL1	-6.73	0.032	MARCHF1	-7.67	0.002	RHD	2.92	0.007	IGLL5	-2.38	0.009
S1 POSTc PLSM US vs T0	PARD6A	7.48	0.006	SRD5A1	-2.08	0.032	ZNF286A	-2.25	0.041	CTD-2184C24.2	-5	0.001
S1 POSTc PLSM US vs T0	NAGPA	4.14	0.04	GZMA	-8.21	< 0.001	NHEJ1	-3.09	0.032	FAM66D	-3.28	0.05
S1 POSTc PLSM US vs T0	LMF1	-6.82	0.026	PAM	2.53	0.019	OR6C75	-2.91	0.003	STX17-AS1	-2.02	0.04
S1 POSTc PLSM US vs T0	CLCN7	2.91	0.007	TRAPPC14	4.68	0.009	ZNF793	-2.77	0.048	SNHG1	2.36	0.009
S1 POSTc PLSM US vs T0	SLC7A5	3.29	0.019	NCAPG2	-5.06	< 0.001	PARVB	-3.7	0.04	GOLGA2P10	7.62	0.003
S1 POSTc PLSM US vs T0	MEFV	-3.7	0.04	HDAC8	-2.68	0.028	FSIP2	-2.88	0.006	CCND2-AS1	-6.91	0.02
S1 POSTc PLSM US vs T0	PIEZO1	-7.52	0.004	GSN	-3.77	0.032	UTS2B	-4.15	0.013	RP11-575F12.2	-2.84	0.037
S1 POSTc PLSM US vs T0	BCKDK	4.4	0.022	ASTN2	-2.1	0.044	RELN	-7.94	0.001	COA8	2.33	0.016
S1 POSTc PLSM US vs T0	TTC23	-6.91	0.02	FUOM	-6.99	0.016	FAM111B	-2.36	0.018	LINC00944	4.31	0.027
S1 POSTc PLSM US vs T0	ATP8B4	-7.86	0.001	PAK1	-5.38	< 0.001	FAM47E	-3.7	0.04	HMBS	-4.26	0.009
S1 POSTc PLSM US vs T0	GABPB1	2.49	0.021	TTC12	-7.28	0.008	ZKSCAN3	-2.16	0.029	RP11-1143G9.4	-5.61	< 0.001
S1 POSTc PLSM US vs T0	DMXL2	-3.77	0.032	TMEM25	-4.09	0.016	USP32P3	-2	0.041	LINC00485	-3.14	0.005
S1 POSTc PLSM US vs T0	DNAJC17	2.71	0.031	MRPL49	1.97	0.043	HLA-DRB1	-2.8	0.006	LINC02328	-3.69	0.016
S1 POSTc PLSM US vs T0	BLOC1S6	-1.88	0.047	KLRF1	-6.82	0.026	S100A4	-4.82	< 0.001	LINC02301	-3.37	0.001
S1 POSTc PLSM US vs T0	GDAP1	-2.19	0.027	KIAA1328	-2.16	0.027	PLEKHG4	-6.99	0.016	LINC00639	-3.35	0.016
S1 POSTc PLSM US vs T0	TRPS1	-4.04	0.019	DLG2	-6.91	0.02	ZNF471	-2.31	0.021	RP11-346D14.1	-2.75	0.003
S1 POSTc PLSM US vs T0	NCALD	-7.34	0.007	OXSM	2.8	0.03	IARS1	2.34	0.011	LINC02254	-1.95	0.043
S1 POSTc PLSM US vs T0	SNX16	-3.62	0.049	C12orf45	-2.44	0.007	LONP1	2.15	0.027	LINC02284	-6.73	0.032
S1 POSTc PLSM US vs T0	BNIP3L	3.02	0.001	MIPOL1	-2.91	0.002	IPO4	-7.34	0.007	RP5-1024G6.7	-2.6	0.032
S1 POSTc PLSM US vs T0	NUCB1	-2.87	0.015	SCLT1	-3.14	0.016	AFAP1	-7.4	0.006	PWRN1	-3.33	0.043
S1 POSTc PLSM US vs T0	FCGRT	-4.7	0.003	QDPR	3.29	0.019	ZNF846	-7.28	0.008	MIR762HG	-2.41	0.031
S1 POSTc PLSM US vs T0	PPP1R13L	2.39	0.036	MMAA	-3	0.043	TCF4	-3.86	0.003	RP11-410C4.5	-3.82	0.004
S1 POSTc PLSM US vs T0	LILRB1	-3.98	0.022	INPP1	-7.14	0.01	DAPK1	-7.4	0.006	HERC2P5	-3.14	0.002
S1 POSTc PLSM US vs T0	TIMM44	3.24	0.001	CCDC122	-2.09	0.03	ARID5A	2.57	0.009	BBS7-DT	-2.2	0.028
S1 POSTc PLSM US vs T0	GPI	1.99	0.032	FBXO4	-6.73	0.032	FUT11	2.61	0.021	HERC2P8	-2.87	0.004
S1 POSTc PLSM US vs T0	BBC3	4.55	0.013	DST	-4.73	0.003	ANXA4	-6.82	0.026	LINC02605	-2.51	0.031
S1 POSTc PLSM US vs T0	DENND3	2.75	0.037	SETBP1	-7.34	0.007	ZNF138	-2.18	0.037	RP11-96K19.4	-2.2	0.018
S1 POSTc PLSM US vs T0	NKG7	-2.51	0.011	PSTPIP2	-7.34	0.007	GAL3ST4	-7.46	0.005	LINC00662	-2.38	0.01
S1 POSTc PLSM US vs T0	ARRDC2	2.32	0.016	SPC25	-3.09	0.032	PGAP1	4.62	0.011	RP11-691G17.1	-2.47	0.01
S1 POSTc PLSM US vs T0	ISYNA1	-4.94	0.001	CCDC50	-6.82	0.026	ZNF772	-6.73	0.032	IKBKE	-3.72	0.002
S1 POSTc PLSM US vs T0	DUS4L	-6.82	0.026	SPEF2	-3.8	0.013	ZNF257	-7.4	0.006	TWSG1-DT	-2.02	0.044
S1 POSTc PLSM US vs T0	CPVL	-9.24	< 0.001	JAKMIP1	-6.82	0.026	ADAM32	-1.88	0.044	RN7SL371P	-6.82	0.026
S1 POSTc PLSM US vs T0	MOSPD3	-3.77	0.032	TXNDC11	-3.38	0.043	SERPINA1	-10.14	< 0.001	UXT-AS1	-3.62	0.049
S1 POSTc PLSM US vs T0	MEST	-7.82	0.002	CFDP1	1.93	0.044	BNIP3P1	3.98	0.001	ZSCAN5A-AS1	-6.99	0.016
S1 POSTc PLSM US vs T0	TMEM176B	-9.08	< 0.001	CEBPG	4.06	< 0.001	OR6Y1	-2.24	0.029	AC007192.4	-2.76	0.021
S1 POSTc PLSM US vs T0	TBL2	4.47	0.019	CNTNAP3B	-3.39	0.014	GZMM	-5.15	< 0.001	LINC00664	-3.77	0.032
S1 POSTc PLSM US vs T0	FKTN	-4.45	0.006	PSMA8	-6.73	0.032	PIGN	-3.32	< 0.001	AC005614.3	-1.97	0.044
S1 POSTc PLSM US vs T0	RIC1	-3.98	0.022	CCDC174	2.69	0.004	PSAP	-2.08	0.022	RP11-370I10.12	-3	0.001
S1 POSTc PLSM US vs T0	MPDZ	-7.14	0.01	RHOC	-2.32	0.046	EME2	-2.24	0.034	KCNQ1OT1	-2.4	0.008
S1 POSTc PLSM US vs T0	NPDC1	-9.17	< 0.001	TTN	-2.51	0.014	NKIRAS1	4.57	< 0.001	IGHV3-30	-3.02	0.002
S1 POSTc PLSM US vs T0	ABCA2	-4.49	0.005	FLACC1	4.4	0.022	S100A6	-1.82	0.049	CCL5	-2.19	0.017
S1 POSTc PLSM US vs T0	PPP3CB	-2.96	0.049	MCU	-3.91	0.027	SNHG12	2.7	0.003	TAGAP-AS1	-3.02	0.002
S1 POSTc PLSM US vs T0	NPM3	-4.15	0.013	ADAMTSL3	-3.16	0.001	TFDP1	-3.77	0.032	RP11-415F23.4	-6.73	0.032
S1 POSTc PLSM US vs T0	ARHGAP21	-3.62	0.049	PCGF6	3.29	0.019	PHETA1	-6.73	0.032	SAP30-DT	2.4	0.02
S1 POSTc PLSM US vs T0	STN1	-3.79	0.004	MTERF3	-3.91	0.027	TPM2	-4.31	0.008	FAM106A	-2.91	0.019
S1 POSTc PLSM US vs T0	CAMTA2	2.52	0.011	PPP2R2B	-4.07	0.006	FLVCR1-DT	-6.99	0.016	RP11-386I14.4	-2.96	0.049
S1 POSTc PLSM US vs T0	ENO3	-7.28	0.008	KCNJ15	-2.86	0.003	HLA-DRB5	-3.02	0.021	RP11-50D16.4	-2.96	0.005
S1 POSTc PLSM US vs T0	TMEM104	-3.62	0.049	TSPAN18	-4.21	0.011	C3orf35	-2.26	0.037	RP11-326N17.2	-2.16	0.039
S1 POSTc PLSM US vs T0	ALDOC	2.45	0.012	MX1	1.96	0.041	GLMP	-6.73	0.032	TPTE	-6.99	0.016
S1 POSTc PLSM US vs T0	BST1	-3.7	0.04	PALM2AKAP2	-4.84	0.002	MSRB1	-4.04	0.019	RNU2-1	-7.07	0.013
S1 POSTc PLSM US vs T0	ELP4	-4.45	0.006	DUSP2	-2.28	0.016	FAM169A	-3.77	0.032	LINC01297	-3.69	0.016
S1 POSTc PLSM US vs T0	MS4A6A	-4.56	< 0.001	CPA5	-9	< 0.001	GK	4.93	< 0.001	U2	-3.98	0.022
S1 POSTc PLSM US vs T0	MVK	-3.62	0.049	DEDD	2.12	0.048	CHAMP1	4.04	0.049	LINC00547	-3.08	0.019
S1 POSTc PLSM US vs T0	BIN2	-2.9	0.002	DMTN	-7.4	0.006	RYR3	-7.34	0.007	CH17-373J23.1	-7.72	0.002
S1 POSTc PLSM US vs T0	RSRC2	1.95	0.032	ADAMTS4	-2.53	0.035	PNMA5	-6.82	0.026	RP11-146E13.4	-3.19	0.004
S1 POSTc PLSM US vs T0	KRT18	4.55	0.013	FCER1G	-6.13	< 0.001	ITPRIPL1	3.96	0.006	SPANXA2-OT1	-2.1	0.031
S1 POSTc PLSM US vs T0	GPN3	2.71	0.016	CSRP1	-5.25	< 0.001	RNY4P7	-6.91	0.02	RP11-734K23.9	-3.32	0.018
S1 POSTc PLSM US vs T0	CDK2AP1	-3.05	0.007	ADGRG5	-6.99	0.016	Y_RNA	-6.82	0.026	U2	-3.91	0.027
S1 POSTc PLSM US vs T0	GTF2H3	-2.84	0.016	TCAF2P1	4.52	< 0.001	7SK	3.52	0.009	IGLV2-8	-2.39	0.014
S1 POSTc PLSM US vs T0	GAPDH	1.86	0.043	ABCG1	-4.09	0.016	INF2	-4.97	0.001	POTEB3	-3.84	0.027
S1 POSTc PLSM US vs T0	TPI1	2.48	0.006	ITGB2	-2.09	0.026	OR2L2	-2.06	0.039	ACACA	-3.28	0.02
S1 POSTc PLSM US vs T0	ENO2	2.43	0.007	LSS	-4.21	0.011	CR1	-3	0.016	RP11-67H24.3	-6.73	0.032
S1 POSTc PLSM US vs T0	PRKAB1	2.6	0.036	CD3G	-2.22	0.015	C6orf99	-7.21	0.008	CH507-513H4.1	-4.13	0.001
S1 POSTc PLSM US vs T0	C2CD5	-2.32	0.033	MRNIP	1.84	0.048	FCGR3A	-8.51	< 0.001	CTD-2144E22.9	-8.21	< 0.001
S1 POSTc PLSM US vs T0	SRSF9	-3.39	0.002	SQSTM1	1.9	0.039	ZDBF2	6.58	< 0.001	RP11-382B18.1	-2.5	0.007
S1 POSTc PLSM US vs T0	FRK	-2.49	0.007	TAMALIN	-3.62	0.049	HLA-DMA	-3.93	< 0.001	AP000432.3	-2.7	0.005
S1 POSTc PLSM US vs T0	MAK	3.84	0.008	RAVER1	-7.57	0.003	SPIN3	-3.07	0.006	RP11-609N14.4	-2.82	0.004
S1 POSTc PLSM US vs T0	SOD2	-1.9	0.04	SPC24	-3.62	0.049	HLA-DRA	-2.81	0.003	CTC-304I17.6	-2.34	0.043
S1 POSTc PLSM US vs T0	ZNF451	2.18	0.023	TNFSF13	-6.73	0.032	AGPAT1	-4.58	0.004	RP11-70L8.5	-2.73	0.048
S1 POSTc PLSM US vs T0	VNN2	-4.84	0.002	WDR90	3.07	0.021	HSPA1B	3.67	0.006	CTA-212A2.2	-4.04	0.019
S1 POSTc PLSM US vs T0	GMNN	4.23	0.032	UBXN1	1.86	0.045	HSPA1A	3.08	0.013	RP11-624A21.1	-2.21	0.018
S1 POSTc PLSM US vs T0	CUL9	-3.98	0.022	SLC25A45	-4.15	< 0.001	NCR3	-4.26	0.009	XXbac-BPG283O16.9	-2.43	0.021
S1 POSTc PLSM US vs T0	LAMA4	-2.76	0.016	RPS6KA4	-6.99	0.016	LST1	-2.19	0.024	LA16c-60D12.1	-2.08	0.045
S1 POSTc PLSM US vs T0	LY86	-6.99	0.016	DHRS3	2.4	0.032	FAM153CP	-2.21	0.027	CH507-528H12.1	-3.52	< 0.001
S1 POSTc PLSM US vs T0	GZMK	-3.21	0.026	GBP2	2.03	0.035	OR14J1	-2.4	0.013	EIF1B-AS1	-2.2	0.02
S1 POSTc PLSM US vs T0	GABRG2	-2.85	0.003	IGSF8	-4.58	0.004	TCTN1	-2.16	0.032	LINC00836	-3	0.043
S1 POSTc PLSM US vs T0	TARS1	2.41	0.01	FCGR3B	-7.34	0.007	FAM71F2	-4.4	0.002	GHET1	-3.38	0.002
S1 POSTc PLSM US vs T0	TTC33	2.48	0.027	DISC1	-4.7	0.003	DUXAP8	-6.99	0.016	HELLPAR	-2.17	0.016
S1 POSTc PLSM US vs T0	SMAD5	-3.77	0.032	CFAP36	2.05	0.029	RNVU1-30	-7.28	0.008	LINC00506	-2.74	0.003
S1 POSTc PLSM US vs T0	HRH2	-4.15	0.013	CTSS	-2.06	0.028	MT-TV	4.59	< 0.001	SEPSECS-AS1	-2.27	0.016
S1 POSTc PLSM US vs T0	BCL6	3.01	0.028	IWS1	3.3	0.008	GNRHR2	-2.29	0.021	LINC00891	-2.13	0.032
S1 POSTc PLSM US vs T0	ARL6	-6.73	0.032	S100A9	-10.02	< 0.001	SACM1L	2	0.048	RN7SK	3.52	0.009
S1 POSTc PLSM US vs T0	OGG1	-3.52	0.028	S100A12	-7.14	0.01	IGKC	-3.01	0.001	TCAF2C	4.57	< 0.001
S1 POSTc PLSM US vs T0	PCCB	2.24	0.049	TRIM46	-4.4	0.007	IGKV4-1	-2.51	0.018	RP11-298A10.3	3.41	< 0.001
S1 POSTc PLSM US vs T0	PFKFB4	3.85	0.003	CHCHD4	7.55	0.004	IGKV3D-20	-2.87	0.004	RP11-419I17.1	-1.96	0.04
S1 POSTc PLSM US vs T0	CISH	-2.63	0.031	FCRL1	-7.82	0.002	IGKV3D-11	-3.04	0.005	RP11-379B18.8	-2.62	0.008
S1 POSTc PLSM US vs T0	DNAH1	-8.24	< 0.001	AIM2	3.41	0.014	IGLV1-50	-2.73	0.048	XXbac-BPG171B11.8	-3.01	0.008
S1 POSTc PLSM US vs T0	CCL20	7.48	0.006	NEPRO	1.97	0.045	IGLV1-47	-3.34	0.001	RP11-503P21.4	-7.57	0.003
S1 POSTc PLSM US vs T0	IFIH1	4.81	0.007	C4orf36	-2.31	0.035	IGLV5-45	-7.67	0.002	RP11-397E7.6	-2.36	0.018
S1 POSTc PLSM US vs T0	DOK1	-3.7	0.04	PLSCR2	-7.07	0.013	IGLV1-44	-3.33	0.001	RP11-826N14.7	-7.28	0.008
S1 POSTc PLSM US vs T0	EHBP1	-4.58	0.004	GYG1	-3.05	0.021	IGLV1-40	-2.54	0.015	LINC00941	-2.91	0.019
S1 POSTc PLSM US vs T0	KYNU	-1.96	0.043	KIF15	-7.07	0.013	IGLV1-36	-2.63	0.041	RP11-19D22.1	-2.14	0.033
S1 POSTc PLSM US vs T0	ORC4	-2.43	0.007	NMNAT3	-2.38	0.008	IGLV2-23	-2.54	0.007	RP11-172F7.1	-2.46	0.022
S1 POSTc PLSM US vs T0	EPHA4	-7.62	0.003	PRKCD	-7.9	0.001	IGLV2-14	-2.13	0.021	RP11-139D23.7	-3.21	0.026
S1 POSTc PLSM US vs T0	ALMS1	-2.77	0.048	RNF168	1.99	0.05	IGLV3-10	-3.95	0.008	RP11-661D17.1	-2.94	0.013
S1 POSTc PLSM US vs T0	SCP2	-2.08	0.033	ZNF589	3.04	0.014	IGLV3-9	-2.91	0.019	RP11-640I2.2	-3.07	0.003
S1 POSTc PLSM US vs T0	QSOX1	-6.73	0.032	INTU	-2.41	0.009	IGLV3-1	-2.91	0.014	LINC02822	-4.12	< 0.001
S1 POSTc PLSM US vs T0	SRSF4	2.25	0.023	RNF123	4.23	0.032	IGLC1	-2.4	0.011	CH507-528H12.10	-8.43	< 0.001
S1 POSTc PLSM US vs T0	WDR77	-3.7	0.04	MON1A	-6.91	0.02	IGLC2	-2.12	0.02	RP11-123O22.2	-7.07	0.013
S1 POSTc PLSM US vs T0	DOCK7	-4.66	0.003	MAP9	-3.38	0.043	IGLC3	-2.11	0.02	CH507-528H12.12	-8.34	< 0.001
S1 POSTc PLSM US vs T0	PRG4	-4.21	0.011	PI16	-8.65	< 0.001	IGHG4	-2.18	0.037	AC003099.2	-2.89	0.001
S1 POSTc PLSM US vs T0	NCF2	-4.31	0.008	MIOS	-7.14	0.01	IGHG2	-2.2	0.016	CH507-528H12.3	-3.98	0.022
S1 POSTc PLSM US vs T0	CFHR3	-6.73	0.032	SYTL3	2.7	0.004	IGHG1	-2.3	0.011	CH507-513H4.7	-3.98	0.022
S1 POSTc PLSM US vs T0	ZNHIT6	-3.56	0.025	CSMD3	-4.4	0.007	IGHG3	-2.31	0.014	VIM2P	-2.2	0.038
S1 POSTc PLSM US vs T0	PTCH2	-6.91	0.02	PDP1	-2.98	0.024	IGHM	-4.79	< 0.001	RP11-686O6.3	3.76	0.005
S1 POSTc PLSM US vs T0	RPS6KA1	-2	0.043	SYK	-7.82	0.002	IGHV2-5	-2.97	0.016	CH507-513H4.10	-8.49	< 0.001
S1 POSTc PLSM US vs T0	RXYLT1	-2.77	0.048	RASEF	-2.94	0.013	IGHV3-7	-3.36	0.003	CH507-528H12.4	-3.98	0.022
S1 POSTc PLSM US vs T0	ARMC2	-6.99	0.016	MELK	-6.91	0.02	IGHV3-11	-2.74	0.017	RP11-510D4.1	-2.12	0.036
S1 POSTc PLSM US vs T0	SPP1	-7.28	0.008	FAAH2	4.41	< 0.001	IGHV3-20	-3.33	0.043	CTB-53D8.2	-3.2	0.002
S1 POSTc PLSM US vs T0	PPL	4.49	0.001	ARHGEF40	-6.91	0.02	IGHV3-21	-3.44	0.006	RP11-454P7.5	-3.96	< 0.001
S1 POSTc PLSM US vs T0	CTNNAL1	3.69	0.003	C12orf50	-1.91	0.048	IGHV3-23	-2.59	0.011	RP11-2G16.1	-2.76	0.021
S1 POSTc PLSM US vs T0	ALG2	3.17	0.016	CASP7	-2.8	0.027	IGHV3-33	-3.07	0.002	RP11-816B18.1	-2.85	0.004
S1 POSTc PLSM US vs T0	CSF3R	-3.05	0.037	AGBL2	-6.99	0.016	IGHV4-39	-4.3	0.003	RP4-738P15.7	-2.89	0.003
S1 POSTc PLSM US vs T0	TMEM214	2.65	0.013	TAF1D	2.77	0.002	IGHV3-48	-2.6	0.032	RP11-56L13.8	-7.9	0.001
S1 POSTc PLSM US vs T0	MXI1	2.56	0.013	R3HCC1L	2.25	0.045	IGHV5-51	-3.73	0.016	RP1-199L16.2	-1.99	0.032
S1 POSTc PLSM US vs T0	SMNDC1	2.42	0.011	RAB8B	2.8	0.008	RNY4P18	-7.28	0.008	RP3-487J7.4	-3.2	0.001
S1 POSTc PLSM US vs T0	WDR11	-5.06	< 0.001	FRS2	4.75	0.008	LPAL2	-3.3	0.002	RP11-2B2.1	-3.08	0.007
S1 POSTc PLSM US vs T0	DUSP1	-3.3	0.003	SMPD1	-3.98	0.022	RP11-306O13.1	-2.46	0.02	RP11-237N2.1	-2.43	0.008
S1 POSTc PLSM US vs T0	TEK	-6.99	0.016	POTED	-6.82	0.026	FAM24B	2.35	0.034	CTD-2215E18.4	-3.54	0.001
S1 POSTc PLSM US vs T0	TGFBI	-8.51	< 0.001	RIC3	-2.74	0.023	HAUS7	-2.34	0.043	RP11-725P16.3	-2.86	0.007
S1 POSTc PLSM US vs T0	ZFP30	2.3	0.029	ZMAT1	-4.54	0.001	GTF2H4	-6.73	0.032	RP11-490F3.3	-2.74	0.002
S1 POSTc PLSM US vs T0	SOCS2	-7.21	0.008	RIMKLB	2.63	0.016	LINC02418	-6.73	0.032	RP11-645I23.1	-2.13	0.04
S1 POSTc PLSM US vs T0	TRIM25	2.28	0.031	CENPV	-3.77	0.032	IFRD2	-5.17	< 0.001	CTA-392G7.1	-2.84	0.016
S1 POSTc PLSM US vs T0	TEX14	-4.26	0.009	YPEL4	2.4	0.032	COL28A1	-2.67	0.011	RP11-76P17.4	-2.91	0.003
S1 POSTc PLSM US vs T0	PLBD1	-6.73	0.032	PCLAF	-3.54	0.009	LINC02649	4.44	0.001	RP11-316A16.2	-2.77	0.048
S1 POSTc PLSM US vs T0	ZNF211	4.23	0.032	ATP23	-3.07	0.002	DHRS4-AS1	-2.68	0.009	RP1-274L7.5	-2.53	0.006
S1 POSTc PLSM US vs T0	CSTA	-7.62	0.003	MS4A7	-6.73	0.032	IFI30	-3.51	0.005	RP11-362H12.2	-2.91	0.014
S1 POSTc PLSM US vs T0	CSMD2	-7.14	0.01	DUSP18	-3.7	0.04	FAM228B	-2.26	0.015	RP1-154K9.3	-3.84	0.027
S1 POSTc PLSM US vs T0	MTIF3	1.97	0.039	NOD2	-7.21	0.008	PPP3CB-AS1	-7.28	0.008	RP3-425C14.8	-2.83	0.006
S1 POSTc PLSM US vs T0	RPAP2	-1.97	0.033	DUS2	-4.26	0.009	OR2A25	-3.77	0.032	RP11-799O21.2	-2.41	0.009
S1 POSTc PLSM US vs T0	RECK	3.64	0.013	ACAA2	-2.36	0.048	XKR9	-2.56	0.01	RP11-404C6.6	-2.7	0.003
S1 POSTc PLSM US vs T0	ECD	-2.32	0.029	ZNF668	4.23	0.032	FAM185A	-4.09	0.016	AC006296.4	-3.65	0.001
S1 POSTc PLSM US vs T0	P4HA1	4.63	< 0.001	PROCA1	-6.82	0.026	FTH1P10	2.16	0.031	RP11-154D6.3	-3.05	0.003
S1 POSTc PLSM US vs T0	MED13L	-2.31	0.035	ZNF528	4.04	0.001	LINC00205	-3.77	0.032	RP11-511B7.2	-2.84	0.037
S1 POSTc PLSM US vs T0	CENPK	-2.37	0.026	DAPK3	4.23	0.032	RP11-33A14.1	-3.7	0.04	CTD-2007H18.2	-2.14	0.032
S1 POSTc PLSM US vs T0	NR4A1	-3.73	0.016	UBXN6	-3.77	0.032	RP5-1180C18.1	-2.07	0.046	RP1-81D8.7	-2.22	0.02
S1 POSTc PLSM US vs T0	G0S2	-3.08	0.019	CDK2AP2	2.86	0.003	CHROMR	-2.71	0.026	RP11-178F10.5	-3.05	0.007
S1 POSTc PLSM US vs T0	ENKD1	4.14	0.04	TMC8	-2.03	0.031	IGKV3D-15	-2.49	0.013	RP11-667L17.1	-5.03	0.001
S1 POSTc PLSM US vs T0	CTCFL	-4.54	0.004	TK1	-7.34	0.007	CTA-292E10.7	4.14	0.04	RP11-702N8.3	-2.81	0.002
S1 POSTc PLSM US vs T0	PPP4R1L	-4.04	0.019	FAM234A	3.44	0.004	LINC01886	-6.73	0.032	CH17-3B23.3	-4.22	0.003
S1 POSTc PLSM US vs T0	PMEPA1	8.39	< 0.001	ABCA3	-6.73	0.032	SVIL-AS1	-4.36	0.008	RP11-168F16.1	-2.29	0.021
S1 POSTc PLSM US vs T0	MCEE	2.7	0.037	FTH1	2.55	0.004	RP11-153F1.1	-6.82	0.026	RP11-63L7.6	7.23	0.01
S1 POSTc PLSM US vs T0	TRERF1	-2.77	0.031	SLC3A2	2.31	0.012	IGHV3-74	-4.58	0.004	RP11-986E7.8	-3.62	0.049
S1 POSTc PLSM US vs T0	DEK	2.07	0.023	RAB31	-7.9	0.001	XXbac-BPG55C20.7	-9.44	< 0.001	RP11-513H8.2	-2.23	0.044
S1 POSTc PLSM US vs T0	FOSB	-4.04	< 0.001	HEXIM2	4.4	0.022	GOLGA2P7	4.19	< 0.001	RP11-686L6.1	-2.95	0.027
S1 POSTc PLSM US vs T0	NAPB	4.31	0.027	TMEM150A	3.22	0.022	SLC26A6	4.31	0.027	NA	NA	NA
S1 POSTc RPMI ST vs POSTc RPMI US	GCLC	3.5	0.025	DBN1	4.58	0.006	PRPS1	4	0.001	SLX1B	7.73	0.002
S1 POSTc RPMI ST vs POSTc RPMI US	RAD52	-2.86	0.008	C3orf14	3.95	0.031	MFHAS1	2.33	0.029	ZBTB20	-2.01	0.046
S1 POSTc RPMI ST vs POSTc RPMI US	LAP3	2.26	0.02	IQCG	2.38	0.048	ADHFE1	-8.79	< 0.001	RFX7	-7.56	0.003
S1 POSTc RPMI ST vs POSTc RPMI US	CFLAR	2.05	0.024	UMPS	2.62	0.01	MTDH	1.86	0.05	ZNF329	-4.22	0.021
S1 POSTc RPMI ST vs POSTc RPMI US	PLXND1	-4.48	0.01	FRMD4B	3.54	< 0.001	POLR2K	3.4	< 0.001	NOP10	1.91	0.041
S1 POSTc RPMI ST vs POSTc RPMI US	HCCS	2.94	0.018	CISH	2.14	0.026	SLC39A4	2.33	0.04	TP53TG1	-4.79	< 0.001
S1 POSTc RPMI ST vs POSTc RPMI US	SKAP2	6.89	0.019	CCL20	6.26	< 0.001	NAPRT	4.36	0.01	SYNM	-6.95	0.019
S1 POSTc RPMI ST vs POSTc RPMI US	MCUB	-3.13	0.002	PSMD14	2.27	0.022	AK3	7.3	0.006	KPNA2	2.11	0.025
S1 POSTc RPMI ST vs POSTc RPMI US	RHBDD2	-2.39	0.015	PPM1G	2.22	0.05	AUH	3.66	0.015	FES	3.78	0.049
S1 POSTc RPMI ST vs POSTc RPMI US	PRSS21	4.42	0.008	GCA	3.5	0.025	SLC25A25	-4.85	0.003	CRIP2	3.78	0.049
S1 POSTc RPMI ST vs POSTc RPMI US	CEACAM21	-4.76	0.004	HTRA2	2.43	0.019	ADD3	-2.1	0.036	C12orf60	-4.6	0.006
S1 POSTc RPMI ST vs POSTc RPMI US	MATK	4.02	0.005	STAT1	3.4	< 0.001	FUOM	5.5	< 0.001	LYSMD4	7.37	0.005
S1 POSTc RPMI ST vs POSTc RPMI US	ST7L	-4.53	< 0.001	GNLY	2.11	0.019	PPRC1	2.75	0.032	HSP90AB3P	3.23	0.007
S1 POSTc RPMI ST vs POSTc RPMI US	PSMB1	1.91	0.049	IL1R2	4.58	0.006	SESN3	-2.76	0.036	RUVBL2	2.2	0.036
S1 POSTc RPMI ST vs POSTc RPMI US	FAM76A	-3.63	0.018	IL1R1	3.78	0.049	TTC12	-4.07	0.031	GDPGP1	-4.29	0.017
S1 POSTc RPMI ST vs POSTc RPMI US	POMT2	-3.38	0.015	STK16	4.48	0.008	ATM	-1.98	0.033	TBK1	2.53	0.025
S1 POSTc RPMI ST vs POSTc RPMI US	ETV7	7.83	0.001	STK25	3.35	0.001	KAT14	5.26	< 0.001	SCFD2	7.56	0.003
S1 POSTc RPMI ST vs POSTc RPMI US	IFFO1	-5.51	< 0.001	ID2	2.88	0.001	CHEK1	3.18	0.049	KNTC1	-7.36	0.006
S1 POSTc RPMI ST vs POSTc RPMI US	SCMH1	3.69	0.005	DNAJC16	-2.7	0.032	SIDT2	-2.55	0.029	PDE4B	2.11	0.026
S1 POSTc RPMI ST vs POSTc RPMI US	LYPLA2	2.64	0.015	RNF19B	4.68	0.004	MPP7	-7.56	0.003	NELL2	-2.56	0.025
S1 POSTc RPMI ST vs POSTc RPMI US	ABHD5	3.2	0.023	GADD45A	4.4	< 0.001	CCT5	3.25	< 0.001	BRF1	-3.38	0.041
S1 POSTc RPMI ST vs POSTc RPMI US	PLAUR	5.84	< 0.001	CRYZ	5.7	< 0.001	ITPR1	2.76	0.049	ATP6V0A2	3.42	< 0.001
S1 POSTc RPMI ST vs POSTc RPMI US	WIZ	6.98	0.015	ZNHIT6	2.5	0.05	NOCT	2.88	0.007	IFNLR1	4.42	0.008
S1 POSTc RPMI ST vs POSTc RPMI US	ZBTB32	5.58	< 0.001	GBP1	1.99	0.041	ANK3	-2.89	0.006	PSMD13	1.92	0.04
S1 POSTc RPMI ST vs POSTc RPMI US	CALCOCO1	-2.24	0.045	ECE1	2.42	0.009	TEX30	2.82	0.019	SLC52A2	2.53	0.025
S1 POSTc RPMI ST vs POSTc RPMI US	MAP4K5	4.24	0.015	EBNA1BP2	2.88	0.006	MBIP	2.47	0.018	EVI2B	-2.51	0.007
S1 POSTc RPMI ST vs POSTc RPMI US	TACC3	-4.5	< 0.001	B4GALT2	5.23	< 0.001	CDC123	2.08	0.043	C16orf54	-3	0.005
S1 POSTc RPMI ST vs POSTc RPMI US	PLEKHB1	-4.29	0.017	PRDX1	2.02	0.025	TMEM45B	-7.56	0.003	ZNF267	2.61	0.007
S1 POSTc RPMI ST vs POSTc RPMI US	ABCC2	-7.36	0.006	STX12	2.58	0.019	AMN1	-3.44	0.035	RASA3	-3.63	0.018
S1 POSTc RPMI ST vs POSTc RPMI US	TYMP	2.3	0.029	POLR1G	4.53	0.007	SACS	2.18	0.048	ZNRF1	6.89	0.019
S1 POSTc RPMI ST vs POSTc RPMI US	SLAMF7	4.86	0.002	RCN2	-4.19	0.003	AP1S3	6.98	0.015	RXRA	4.17	0.017
S1 POSTc RPMI ST vs POSTc RPMI US	IKZF2	5.88	< 0.001	ATP10B	-2.78	0.026	SETBP1	7.78	0.001	GNG2	2.27	0.015
S1 POSTc RPMI ST vs POSTc RPMI US	FAM13B	-2.71	0.018	SPP1	2.48	0.025	XRCC4	4.1	0.021	INSIG1	3.19	< 0.001
S1 POSTc RPMI ST vs POSTc RPMI US	EIPR1	4.48	0.008	PPL	-4.48	0.01	SUV39H2	3.78	0.049	MIR22HG	3.91	0.002
S1 POSTc RPMI ST vs POSTc RPMI US	APBA2	-4.48	0.01	LDAH	4.58	0.006	ZFP36L2	-1.89	0.049	TNFRSF4	4.78	< 0.001
S1 POSTc RPMI ST vs POSTc RPMI US	SH3YL1	-3.09	0.006	ELL2	4.87	< 0.001	RASGRP3	2.85	0.036	TNFRSF18	2.68	0.01
S1 POSTc RPMI ST vs POSTc RPMI US	FBXO42	-3.31	0.049	C1orf198	4.3	0.012	BANK1	-4.54	0.007	RHD	-2.42	0.026
S1 POSTc RPMI ST vs POSTc RPMI US	METTL1	4.03	0.026	NEK6	-4.07	0.031	TXNDC11	-5.07	0.001	EIF4EBP1	2.77	0.011
S1 POSTc RPMI ST vs POSTc RPMI US	SPDL1	4.3	0.012	HSDL2	-3.99	0.039	CETN3	2.74	0.006	AGRN	2.93	0.001
S1 POSTc RPMI ST vs POSTc RPMI US	CTNS	7.3	0.006	FCF1	1.98	0.048	GRAP	-7.04	0.015	PLSCR1	4.58	0.006
S1 POSTc RPMI ST vs POSTc RPMI US	PSMA4	2.03	0.025	IFIT2	-3.74	0.013	GBP5	3.35	< 0.001	FOCAD	-2.22	0.049
S1 POSTc RPMI ST vs POSTc RPMI US	TSPAN17	3.87	0.039	RCL1	4.42	0.008	SLFN13	-4.15	0.026	SELL	-2.45	0.011
S1 POSTc RPMI ST vs POSTc RPMI US	NOP16	3.15	< 0.001	CD274	4.53	0.007	OXNAD1	-2.32	0.014	H2AX	7.44	0.004
S1 POSTc RPMI ST vs POSTc RPMI US	TNFRSF9	7.67	< 0.001	CYSTM1	2.46	0.016	GRAMD2B	4.86	0.002	ALKBH2	2.83	0.025
S1 POSTc RPMI ST vs POSTc RPMI US	NFE2L3	3.25	0.041	TCP1	2.18	0.02	RHOC	2.03	0.042	FHIT	-4.54	0.007
S1 POSTc RPMI ST vs POSTc RPMI US	KIF1B	2.8	0.041	NUDCD1	6.68	< 0.001	DBI	2.22	0.014	SLC35E2B	-2.26	0.024
S1 POSTc RPMI ST vs POSTc RPMI US	SYNE2	-2.03	0.026	HSPH1	1.99	0.04	PIK3AP1	2.88	0.049	TMEM63A	-2.98	0.005
S1 POSTc RPMI ST vs POSTc RPMI US	FAM168A	-6.95	0.019	EGR1	4.17	< 0.001	FLACC1	3.87	0.039	SEMA4A	8.73	< 0.001
S1 POSTc RPMI ST vs POSTc RPMI US	GALC	2.43	0.023	DUSP4	2.72	0.007	SLA	2.25	0.023	ZNF836	-3.57	0.025
S1 POSTc RPMI ST vs POSTc RPMI US	SZRD1	2.05	0.041	TEX14	7.56	0.003	BATF	2.2	0.036	AFAP1	3.95	0.031
S1 POSTc RPMI ST vs POSTc RPMI US	ITIH4	-7.79	0.001	CXCR4	-2.07	0.022	CXCL13	7.23	0.007	VKORC1L1	6.89	0.019
S1 POSTc RPMI ST vs POSTc RPMI US	ATG5	2.53	0.036	MTERF4	-2.05	0.036	RWDD2B	-5.7	< 0.001	CD47	2.05	0.025
S1 POSTc RPMI ST vs POSTc RPMI US	USP13	-3.9	0.049	LY9	-2.3	0.019	RPGR	4.42	0.008	MAML3	7.3	0.006
S1 POSTc RPMI ST vs POSTc RPMI US	UNKL	-2.59	0.036	RWDD3	-3.19	0.003	CD109	4.17	0.017	ARHGEF12	7.23	0.007
S1 POSTc RPMI ST vs POSTc RPMI US	TBXAS1	6.89	0.019	INHBA	4.14	0.003	KAT6B	-2.31	0.031	PDLIM7	4.03	0.026
S1 POSTc RPMI ST vs POSTc RPMI US	BCAT1	2.39	0.038	CALD1	7.93	< 0.001	FBXO32	-3.84	0.01	FAM3C	3.78	0.049
S1 POSTc RPMI ST vs POSTc RPMI US	POLD1	3.87	0.039	SRGN	2.44	0.006	BRPF1	4.36	0.01	MAFG	3.14	0.003
S1 POSTc RPMI ST vs POSTc RPMI US	ATP2C2	-8.25	< 0.001	EGR2	11.28	< 0.001	LRP8	4.47	< 0.001	SRC	3.95	0.031
S1 POSTc RPMI ST vs POSTc RPMI US	TMEM161A	4.82	0.003	CCDC91	-3.21	0.002	TSC22D3	-2.96	0.001	ACSL5	2.3	0.024
S1 POSTc RPMI ST vs POSTc RPMI US	ZNF76	-2.32	0.047	ACOT9	3.1	0.002	ETS2	4.1	< 0.001	SERPINA1	6.89	0.019
S1 POSTc RPMI ST vs POSTc RPMI US	IPO5	2.71	0.009	PRDX4	2.98	0.004	PALM2AKAP2	4.58	< 0.001	LRP10	-2.48	0.049
S1 POSTc RPMI ST vs POSTc RPMI US	WDR18	5.39	< 0.001	DDX39A	2.25	0.016	TNFRSF14	2.44	0.017	PDGFA	5.3	< 0.001
S1 POSTc RPMI ST vs POSTc RPMI US	DGKA	-2.27	0.016	NR4A1	3.31	< 0.001	DUSP2	3.37	< 0.001	RPF2	2.02	0.037
S1 POSTc RPMI ST vs POSTc RPMI US	MTHFD2	2.99	< 0.001	TUBA1B	1.98	0.031	AUTS2	-3.52	0.006	SERPINB2	8.83	< 0.001
S1 POSTc RPMI ST vs POSTc RPMI US	STAG3	-2.37	0.049	BATF3	8.4	< 0.001	ZFAND2B	-5.98	< 0.001	PHF2	-4.07	0.031
S1 POSTc RPMI ST vs POSTc RPMI US	CACNB1	4.42	0.008	CKS2	2.47	0.036	EMSY	-2.31	0.031	KLHDC1	-4.15	0.026
S1 POSTc RPMI ST vs POSTc RPMI US	RRP15	2.04	0.049	SDC4	4.36	0.01	RNF166	-8.21	< 0.001	ZNF44	-2.66	0.029
S1 POSTc RPMI ST vs POSTc RPMI US	IFI35	3.71	0.013	CDKN1A	3.04	< 0.001	FCER1G	4.81	< 0.001	MPZL1	2.53	0.046
S1 POSTc RPMI ST vs POSTc RPMI US	MEF2A	2.73	0.01	SH3TC1	-5.22	< 0.001	CFAP298	2.35	0.023	HMGN5	2.45	0.032
S1 POSTc RPMI ST vs POSTc RPMI US	ATP11A	3.56	0.021	BBS2	-2.42	0.031	ATP5MC1	1.95	0.036	TMEM116	-2.78	0.049
S1 POSTc RPMI ST vs POSTc RPMI US	RASGRP2	-2.39	0.009	MT2A	3.09	< 0.001	CHCHD6	3.07	0.019	PIM3	4.32	< 0.001
S1 POSTc RPMI ST vs POSTc RPMI US	SDK2	-5.11	0.001	TMTC4	4.36	0.01	ABCG1	-8.43	< 0.001	WWP2	-2.66	0.025
S1 POSTc RPMI ST vs POSTc RPMI US	ATP1B3	2.31	0.015	DMAC2L	5.44	< 0.001	SHKBP1	2.16	0.047	MT1F	2.75	0.015
S1 POSTc RPMI ST vs POSTc RPMI US	ASNS	2.56	0.013	SLC25A19	2.26	0.029	SLC25A44	4.63	0.005	TMA16	2.15	0.026
S1 POSTc RPMI ST vs POSTc RPMI US	ZFYVE26	-4.6	0.006	MBOAT7	-2.25	0.039	LMNA	5.23	< 0.001	TTC37	-2.56	0.021
S1 POSTc RPMI ST vs POSTc RPMI US	UBE2D1	2.68	0.029	IL1B	7.93	< 0.001	GPATCH4	2.26	0.02	SLC9A6	-3.23	0.023
S1 POSTc RPMI ST vs POSTc RPMI US	SELENOO	-6.95	0.019	VASP	2.26	0.027	FCRL3	7.78	0.001	TOGARAM1	4.82	0.003
S1 POSTc RPMI ST vs POSTc RPMI US	PDE8A	-3.99	0.039	ITPA	2.75	0.012	ORAI2	-2.12	0.032	F5	-3.9	0.049
S1 POSTc RPMI ST vs POSTc RPMI US	PTGS2	6.92	< 0.001	FAM110A	-4.03	0.006	MGAT4B	7.37	0.005	MSRB1	2.6	0.017
S1 POSTc RPMI ST vs POSTc RPMI US	RAB7A	2.4	0.008	ARMCX5	4.42	0.008	PSMC2	1.93	0.04	ZNF652	-2.37	0.016
S1 POSTc RPMI ST vs POSTc RPMI US	RBMS2	-3.63	0.018	PRMT1	2.15	0.018	MFSD12	2.88	0.049	PNP	2.39	0.009
S1 POSTc RPMI ST vs POSTc RPMI US	SPAG5	3.79	< 0.001	DYNC2I1	-2.76	0.011	ACOX1	-3.31	0.049	GK	3.75	< 0.001
S1 POSTc RPMI ST vs POSTc RPMI US	UBE2A	2.51	0.009	SLC10A3	-4.54	0.007	ITGA5	-3.38	0.015	INPP5F	4.58	0.006
S1 POSTc RPMI ST vs POSTc RPMI US	SYNJ2	5.44	< 0.001	FGD3	-2.3	0.016	TBC1D24	-3.23	0.023	SELENOM	-2.2	0.039
S1 POSTc RPMI ST vs POSTc RPMI US	CBFA2T2	-5.36	< 0.001	HIVEP3	7.23	0.007	KIAA1522	3.78	0.049	BHLHB9	-6.95	0.019
S1 POSTc RPMI ST vs POSTc RPMI US	THOC1	3	0.002	IL22	7.83	0.001	AGL	7.56	0.003	DZIP3	-5.07	0.001
S1 POSTc RPMI ST vs POSTc RPMI US	KEAP1	4.53	0.007	TMEM175	2.88	0.049	NLRP3	5.3	< 0.001	KIAA0753	-3.9	0.049
S1 POSTc RPMI ST vs POSTc RPMI US	SESN1	-4.85	0.003	KLF2	-4.93	< 0.001	PEA15	2.21	0.037	KIFBP	3.78	0.049
S1 POSTc RPMI ST vs POSTc RPMI US	PUM3	2.17	0.026	METTL25	-3.74	0.013	ATF3	5.5	< 0.001	TRAF3IP1	3.87	0.039
S1 POSTc RPMI ST vs POSTc RPMI US	AP4E1	2.85	0.036	SPINK2	-7.04	0.015	SNED1	-4.29	0.017	ZDBF2	-5.36	< 0.001
S1 POSTc RPMI ST vs POSTc RPMI US	CXCL2	8.73	< 0.001	TPST2	2.18	0.025	IL24	-2.05	0.039	PFDN6	3.06	0.004
S1 POSTc RPMI ST vs POSTc RPMI US	TCF7	-4.33	< 0.001	MPST	5.09	< 0.001	FCMR	-2.65	0.006	PBX2	-7.13	0.012
S1 POSTc RPMI ST vs POSTc RPMI US	IL12RB2	3.14	0.003	CHAC1	2.71	0.036	SMARCAD1	2.63	0.047	AGER	-7.63	0.003
S1 POSTc RPMI ST vs POSTc RPMI US	FYB1	-3.25	< 0.001	PALLD	4.36	0.01	CTSS	2	0.039	NELFE	2.14	0.039
S1 POSTc RPMI ST vs POSTc RPMI US	DLG3	-2.83	0.041	MPDU1	2.98	0.025	BOLA3	1.99	0.037	TCTN1	-2.98	0.028
S1 POSTc RPMI ST vs POSTc RPMI US	TRAF5	-2.38	0.036	QRICH2	-7.29	0.007	S100A11	2.47	0.006	C4orf47	-3.44	0.035
S1 POSTc RPMI ST vs POSTc RPMI US	TDRD3	-7.99	< 0.001	SEC14L1	2.08	0.049	ARHGAP25	2.56	0.007	ZBTB10	7.88	0.001
S1 POSTc RPMI ST vs POSTc RPMI US	ZMPSTE24	5.63	< 0.001	CDKN1C	-7.21	0.009	GPR155	-2.48	0.029	SAP25	-2.61	0.022
S1 POSTc RPMI ST vs POSTc RPMI US	RAB10	2.71	0.011	MAU2	-2.4	0.037	PBXIP1	-2.58	0.008	ITSN1	3.71	0.013
S1 POSTc RPMI ST vs POSTc RPMI US	CD59	2.59	0.006	SAT1	2.37	0.008	EOGT	2.88	0.049	MT-TQ	1.9	0.041
S1 POSTc RPMI ST vs POSTc RPMI US	DNAJA1	2.65	0.004	SNX9	2.33	0.016	CCT3	2.11	0.023	STK38L	4.24	0.015
S1 POSTc RPMI ST vs POSTc RPMI US	SNX10	6.98	0.015	UCK1	-6.95	0.019	AIM2	2.55	0.018	LINC01089	-7.63	0.003
S1 POSTc RPMI ST vs POSTc RPMI US	LAT2	3.39	< 0.001	MPP1	-2.63	0.023	ICA1L	-6.95	0.019	FAM24B	-4.29	0.017
S1 POSTc RPMI ST vs POSTc RPMI US	HUWE1	2.68	0.003	HAUS8	2.79	0.029	CCDC191	-7.29	0.007	HAUS7	2.9	0.02
S1 POSTc RPMI ST vs POSTc RPMI US	PPP1R15A	2.02	0.031	SH3BP5	3.11	0.031	SMIM14	-3.48	0.006	LCAT	-3.99	0.039
S1 POSTc RPMI ST vs POSTc RPMI US	SH3BP2	2.6	0.009	TUBG1	2.13	0.04	CXCL3	5.02	0.001	VDAC1	2.01	0.031
S1 POSTc RPMI ST vs POSTc RPMI US	AAMDC	2.76	0.049	PSME3	3.67	< 0.001	ARHGEF3	-2.93	0.031	NCKIPSD	-4.07	0.031
S1 POSTc RPMI ST vs POSTc RPMI US	SULT2B1	-7.5	0.004	NINJ1	3.06	0.003	MAP9	4.42	0.008	MRPL23	7.19	< 0.001
S1 POSTc RPMI ST vs POSTc RPMI US	KIZ	-4.94	0.002	CA6	-4.8	0.003	HPGD	2.24	0.042	TSPAN4	7.5	0.003
S1 POSTc RPMI ST vs POSTc RPMI US	P2RX7	4.73	0.004	CHSY1	2.97	0.016	ABCE1	2.09	0.039	PDPR2P	-3.9	0.049
S1 POSTc RPMI ST vs POSTc RPMI US	TRMT6	3.33	< 0.001	GCH1	5.55	< 0.001	OTUD4	2.18	0.018	LINC01588	2.87	0.023
S1 POSTc RPMI ST vs POSTc RPMI US	ZBTB25	-2.75	0.004	ENOSF1	3.33	0.001	STARD4	3.11	0.031	DHRS4-AS1	-2.69	0.023
S1 POSTc RPMI ST vs POSTc RPMI US	RCOR1	-7.29	0.007	SLX1A	8.06	< 0.001	SERINC5	-2.85	0.017	RP11-465B22.3	4.64	< 0.001
S1 POSTc RPMI ST vs POSTc RPMI US	GPATCH2L	3.31	0.005	TRIM5	-2.98	0.028	CSF2	8.71	< 0.001	PAM16	2.47	0.011
S1 POSTc RPMI ST vs POSTc RPMI US	ZNF268	-3.33	0.017	PTPRE	2.43	0.014	CGAS	2.46	0.044	VAMP2	-2.43	0.014
S1 POSTc RPMI ST vs POSTc RPMI US	CERS4	5.09	< 0.001	RAN	1.99	0.029	PTTG1	2.2	0.022	CYTOR	2.59	0.004
S1 POSTc RPMI ST vs POSTc RPMI US	NLRP1	-2.23	0.022	MYBBP1A	3.38	0.013	SYTL3	1.94	0.039	CCDC18-AS1	-2.71	0.004
S1 POSTc RPMI ST vs POSTc RPMI US	G2E3	2.88	0.049	EIF5A	1.87	0.044	SLC4A2	8.06	< 0.001	OSER1-DT	-2.64	0.02
S1 POSTc RPMI ST vs POSTc RPMI US	PHGDH	4.17	0.017	FLOT2	-2.24	0.045	GEM	8.4	< 0.001	DNAJC27-AS1	-7.21	0.009
S1 POSTc RPMI ST vs POSTc RPMI US	ADA2	-8.43	< 0.001	PCED1A	-3.9	0.049	NFIL3	3.95	0.031	MKRN2OS	-3.9	0.049
S1 POSTc RPMI ST vs POSTc RPMI US	CREM	2.3	0.01	DPH2	7.3	0.006	PIGA	8.46	< 0.001	MCRIP1	2.14	0.022
S1 POSTc RPMI ST vs POSTc RPMI US	HSP90AB1	2.27	0.01	PATJ	-3.25	0.003	VCP	1.84	0.05	ERCC6	-4.42	0.012
S1 POSTc RPMI ST vs POSTc RPMI US	ACOT7	8.14	< 0.001	POMP	2.38	0.008	STOML2	2.05	0.036	AC058791.1	4.49	< 0.001
S1 POSTc RPMI ST vs POSTc RPMI US	PCSK5	-3.9	0.049	CDK8	7.68	0.002	ARHGAP12	-4.71	0.004	CTA-292E10.6	-2.93	0.031
S1 POSTc RPMI ST vs POSTc RPMI US	MTAP	2.32	0.037	EPSTI1	3.31	0.005	ENTR1	2.52	0.014	FAM30A	-3.99	0.039
S1 POSTc RPMI ST vs POSTc RPMI US	GADD45B	1.92	0.049	SLC2A11	-2.78	0.049	DDX21	2.46	0.006	LINC02611	-7.68	0.002
S1 POSTc RPMI ST vs POSTc RPMI US	RANBP1	2.65	0.005	MICAL2	3.73	0.002	TC2N	-3.26	0.006	LTA	4.33	< 0.001
S1 POSTc RPMI ST vs POSTc RPMI US	PES1	4.54	< 0.001	ARF3	2.41	0.031	TCP11L2	-2.92	0.023	RP11-203J24.8	-2.78	0.049
S1 POSTc RPMI ST vs POSTc RPMI US	LRP5L	-7.04	0.015	YWHAQ	2.99	0.001	RAB8B	2.26	0.03	LINC01515	-6.95	0.019
S1 POSTc RPMI ST vs POSTc RPMI US	HIRA	-4.07	0.031	RSAD2	4.29	< 0.001	SGPL1	3.22	0.012	PATL2	-2.22	0.025
S1 POSTc RPMI ST vs POSTc RPMI US	LGALS1	1.98	0.031	RBM17	2.2	0.019	CCT2	2.54	0.006	PDE4DIPP6	-3.98	0.006
S1 POSTc RPMI ST vs POSTc RPMI US	PIK3IP1	-2.16	0.02	IL2RA	5.04	< 0.001	TPP1	-2.27	0.014	DARS1-AS1	-4.27	< 0.001
S1 POSTc RPMI ST vs POSTc RPMI US	PATZ1	-4.94	0.002	KLRC1	3.85	0.003	ZMAT1	-3.07	0.036	VIPR1-AS1	-6.95	0.019
S1 POSTc RPMI ST vs POSTc RPMI US	TRIOBP	-3.9	0.049	ACP2	2.38	0.027	CIAO2B	2.27	0.012	MHENCR	-7.85	0.001
S1 POSTc RPMI ST vs POSTc RPMI US	PPP6R2	-4.85	0.003	STK26	3.01	0.005	BLCAP	-2.85	0.003	KANTR	-3.18	0.026
S1 POSTc RPMI ST vs POSTc RPMI US	APOBEC3H	2.63	0.026	GNL2	2.91	0.003	C15orf48	8.75	< 0.001	TNF	5.05	< 0.001
S1 POSTc RPMI ST vs POSTc RPMI US	CBX7	-2.01	0.046	ARHGAP32	-7.04	0.015	PHB	3.04	< 0.001	LYRM9	-7.29	0.007
S1 POSTc RPMI ST vs POSTc RPMI US	APOL1	3.07	0.001	CTSL	3.99	< 0.001	FAM102A	-2.06	0.045	RP11-421L21.3	-4.15	0.026
S1 POSTc RPMI ST vs POSTc RPMI US	BRD1	-4.85	0.003	PSAT1	3.87	0.001	NOD2	4.24	0.015	MIR155HG	6.09	< 0.001
S1 POSTc RPMI ST vs POSTc RPMI US	GZMH	7.93	< 0.001	ADAM19	4.17	< 0.001	ACAA2	2.22	0.046	PPP1R3E	-2.63	0.023
S1 POSTc RPMI ST vs POSTc RPMI US	GZMB	8.04	< 0.001	PNPLA8	2.32	0.027	ZNF23	-4.48	0.01	ZNF815P	-8.32	< 0.001
S1 POSTc RPMI ST vs POSTc RPMI US	ATP6V1D	2.53	0.018	PAN2	-5.29	< 0.001	TUBA1C	1.98	0.03	AC006547.13	-7.36	0.006
S1 POSTc RPMI ST vs POSTc RPMI US	GSTZ1	-7.21	0.009	CCT7	1.82	0.049	KIR3DL1	6.98	0.015	LINC01792	4.68	0.004
S1 POSTc RPMI ST vs POSTc RPMI US	AHSA1	2.26	0.015	MPHOSPH6	2.13	0.04	TMEM99	-2.54	0.05	GS1-124K5.4	-4.22	0.021
S1 POSTc RPMI ST vs POSTc RPMI US	RPS6KA5	2.12	0.046	NPL	7.56	0.003	RAB26	5.23	< 0.001	LINC01409	-2.92	0.023
S1 POSTc RPMI ST vs POSTc RPMI US	PSMA6	1.91	0.038	SERPINE2	2.55	0.02	TRANK1	-5.45	< 0.001	FAM200B	-2.76	0.007
S1 POSTc RPMI ST vs POSTc RPMI US	NFKBIA	2.53	0.006	EIF4E2	2.47	0.014	LTBP3	-4.07	0.031	SNORD13	3.45	0.006
S1 POSTc RPMI ST vs POSTc RPMI US	EMC9	-2.34	0.036	TSGA10	-4.29	0.017	TTC39C	-2.55	0.024	CASTOR3	-8.74	< 0.001
S1 POSTc RPMI ST vs POSTc RPMI US	PSME2	2.73	0.002	SLC41A2	3.95	0.031	MFSD2A	7.83	0.001	NME1	3.01	< 0.001
S1 POSTc RPMI ST vs POSTc RPMI US	RABGGTA	2.51	0.019	NEK3	-4.07	0.031	CMAHP	3.61	0.001	AMY2B	-4.54	0.007
S1 POSTc RPMI ST vs POSTc RPMI US	RAB5IF	5.09	< 0.001	RCBTB2	-7.36	0.006	STIP1	2.79	0.002	SOCAR	3.25	0.002
S1 POSTc RPMI ST vs POSTc RPMI US	SLCO4A1	3.38	0.013	IL6	7.37	0.005	POLR3D	3.41	0.002	PLCXD2	6.98	0.015
S1 POSTc RPMI ST vs POSTc RPMI US	ARFGAP1	3.16	0.026	ACTL6A	2.31	0.025	ZNF30	-4.29	0.017	PISD	2.75	0.01
S1 POSTc RPMI ST vs POSTc RPMI US	KIF3B	3.62	0.006	MRPL47	2.09	0.035	IL7R	-2.29	0.011	EIF6	2.46	0.006
S1 POSTc RPMI ST vs POSTc RPMI US	USP14	3.66	< 0.001	IL1RN	9.16	< 0.001	PKIG	4.73	0.004	HLA-DMB	-3.07	0.015
S1 POSTc RPMI ST vs POSTc RPMI US	RBBP8	7.88	0.001	TXN	3.2	< 0.001	TNIP2	5.26	< 0.001	RP11-54O7.14	2.89	0.005
S1 POSTc RPMI ST vs POSTc RPMI US	POLA1	2.72	0.026	IL11RA	-7.36	0.006	IL13	9.55	< 0.001	RP11-285F7.2	-3.68	0.015
S1 POSTc RPMI ST vs POSTc RPMI US	NXT2	7.3	0.006	FOXP4	3.78	0.049	CXCL10	6.98	0.015	LINC00847	-6.2	< 0.001
S1 POSTc RPMI ST vs POSTc RPMI US	ATP11C	-4.42	0.012	PPIL1	3.95	0.031	CRADD	2.95	0.004	LINC00861	-3.11	0.003
S1 POSTc RPMI ST vs POSTc RPMI US	MAGT1	2.56	0.026	TJAP1	3.14	0.01	PTK2	-4.15	0.026	LINC02325	-4.98	0.002
S1 POSTc RPMI ST vs POSTc RPMI US	CD40LG	2.64	0.007	IRF4	4.09	< 0.001	CXCL8	6.94	< 0.001	LINC01550	-5.28	< 0.001
S1 POSTc RPMI ST vs POSTc RPMI US	GLA	3.61	< 0.001	TUBB2A	5.06	0.001	CD52	-2.15	0.02	CTD-2366F13.1	-3.68	0.015
S1 POSTc RPMI ST vs POSTc RPMI US	NDFIP2	7.43	< 0.001	UQCC2	2.71	0.012	ZEB2	2.9	0.031	LUCAT1	2.16	0.024
S1 POSTc RPMI ST vs POSTc RPMI US	FNDC3A	3.44	0.003	IER3	5.25	< 0.001	DFFB	-4.15	0.026	NAIP	-3.15	0.017
S1 POSTc RPMI ST vs POSTc RPMI US	FLT1	4.63	0.005	VARS2	-6.95	0.019	ASPSCR1	-4.15	0.026	RP11-15K19.2	3.95	0.031
S1 POSTc RPMI ST vs POSTc RPMI US	TSC22D1	-3.11	0.019	LRRC32	4.63	0.005	MT1E	3.01	0.005	LINC02482	-4.48	0.01
S1 POSTc RPMI ST vs POSTc RPMI US	NFAT5	2.09	0.023	SORL1	-3.14	< 0.001	DUS1L	4.48	0.008	KB-173C10.2	7.07	0.012
S1 POSTc RPMI ST vs POSTc RPMI US	CCL22	-2.31	0.023	SLC37A4	5.42	< 0.001	NIPA1	4.53	0.007	RP11-660L16.2	-3.99	0.039
S1 POSTc RPMI ST vs POSTc RPMI US	NAGPA	-7.56	0.003	RDX	2.52	0.006	NFRKB	-2.02	0.043	DPP3	5.09	< 0.001
S1 POSTc RPMI ST vs POSTc RPMI US	SLC7A5	2.85	0.004	MAPKBP1	-3.31	0.049	FOS	3.06	0.001	STX16-NPEPL1	-4.4	< 0.001
S1 POSTc RPMI ST vs POSTc RPMI US	ATP8B4	6.89	0.019	IFI44	-3.9	0.049	DNAJC18	4	0.001	SMIM3	2.57	0.04
S1 POSTc RPMI ST vs POSTc RPMI US	GABPB1	2.22	0.024	IFT172	-4.71	0.004	SERPINB9	1.9	0.042	RP11-111K18.1	2.21	0.015
S1 POSTc RPMI ST vs POSTc RPMI US	SGK3	-3.9	0.049	PREB	2.31	0.031	COMMD5	2.68	0.01	PARP11-AS1	-7.04	0.015
S1 POSTc RPMI ST vs POSTc RPMI US	NBN	2.14	0.049	DTNB	4.1	0.021	GTSF1	-7.29	0.007	ODC1-DT	-2.49	0.011
S1 POSTc RPMI ST vs POSTc RPMI US	LAPTM4B	3.27	0.002	STAMBPL1	3.04	0.007	ARMC10	2.63	0.026	FNTB	-4.07	0.031
S1 POSTc RPMI ST vs POSTc RPMI US	IKBKB	-2.48	0.021	DUSP5	4.17	0.017	AC093323.3	-7.56	0.003	RP11-161H23.5	2	0.042
S1 POSTc RPMI ST vs POSTc RPMI US	NDRG1	1.96	0.031	ATIC	3.18	0.006	RIOX2	4.48	0.008	C17orf49	2.38	0.009
S1 POSTc RPMI ST vs POSTc RPMI US	LEPROTL1	-2.07	0.024	IDH1	-7.29	0.007	BCL2L1	5.39	< 0.001	TRIM34	-3.99	0.039
S1 POSTc RPMI ST vs POSTc RPMI US	KCNN4	5.14	< 0.001	UBL7	2.05	0.049	BCL2	1.99	0.037	NR4A1AS	6.98	0.015
S1 POSTc RPMI ST vs POSTc RPMI US	TULP2	2.15	0.04	FAM13A	-7.95	< 0.001	CTPS1	4.51	< 0.001	ERVK13-1	3.79	0.003
S1 POSTc RPMI ST vs POSTc RPMI US	NFKBIB	2.25	0.039	PPA2	1.9	0.049	ATPAF2	4.86	0.002	LINC02193	-2.85	0.021
S1 POSTc RPMI ST vs POSTc RPMI US	ARHGEF18	-3.45	0.007	CASP6	-2.4	0.04	BSG	2.02	0.032	SNORD3B-2	3.75	< 0.001
S1 POSTc RPMI ST vs POSTc RPMI US	TRMT1	6.06	< 0.001	LEF1	-2.96	0.003	FGGY	-7.99	< 0.001	RP11-160E2.6	4.32	< 0.001
S1 POSTc RPMI ST vs POSTc RPMI US	IL4I1	7.07	0.012	SINHCAF	2.27	0.017	MANEA	7.07	0.012	ZNF213-AS1	-4.65	0.005
S1 POSTc RPMI ST vs POSTc RPMI US	ZNF419	-3.18	0.026	CLSTN3	-2.96	0.02	PPP1CA	2	0.029	SNORD3A	4.2	< 0.001
S1 POSTc RPMI ST vs POSTc RPMI US	PDCD5	1.99	0.038	VAMP1	-2.52	0.044	CTSW	2.38	0.013	NBPF11	-3	0.004
S1 POSTc RPMI ST vs POSTc RPMI US	SLC1A5	3.51	< 0.001	CD27	-4.15	< 0.001	KLHL6	3	0.003	ENSG00000263963	-2.17	0.033
S1 POSTc RPMI ST vs POSTc RPMI US	DENND3	3.01	0.015	PHLDA1	3.6	< 0.001	THEMIS	-7.11	< 0.001	TTC39C-AS1	-3.79	0.011
S1 POSTc RPMI ST vs POSTc RPMI US	NKG7	2.37	0.012	DUSP6	8.06	< 0.001	RAB37	-8.21	< 0.001	SNORD3C	4.06	< 0.001
S1 POSTc RPMI ST vs POSTc RPMI US	ATP13A1	-5.29	< 0.001	SLC7A1	2.43	0.016	MIR4435-2HG	2.48	0.006	CTD-2370N5.3	-3.23	0.009
S1 POSTc RPMI ST vs POSTc RPMI US	CDK6	3.2	< 0.001	SUOX	-4.29	0.017	COQ2	-7.85	0.001	TSPOAP1-AS1	-6.95	0.019
S1 POSTc RPMI ST vs POSTc RPMI US	TFPI2	7.23	0.007	GALNT6	4.63	0.005	ESRRA	7.3	0.006	SNORD3B-1	3.66	< 0.001
S1 POSTc RPMI ST vs POSTc RPMI US	NAMPT	3.38	< 0.001	SLAIN1	4.24	0.015	RAPH1	3.87	0.039	RP11-21J18.1	2.16	0.019
S1 POSTc RPMI ST vs POSTc RPMI US	ATP6V0A4	7.56	0.003	WARS1	3.22	< 0.001	ZNF483	-3.99	0.039	RP11-849F2.5	6.89	0.019
S1 POSTc RPMI ST vs POSTc RPMI US	ADAP1	3.95	0.031	SLC27A2	6.89	0.019	MAP3K11	-4.54	0.007	TXNIP	-2.33	0.029
S1 POSTc RPMI ST vs POSTc RPMI US	TFR2	6.98	0.015	CDAN1	-7.21	0.009	CEP83	4.21	0.002	NBPF15	-2.29	0.017
S1 POSTc RPMI ST vs POSTc RPMI US	AP1S1	6.89	0.019	ETFA	2.12	0.031	PSMD1	2.74	0.003	NBPF12	-2.93	0.002
S1 POSTc RPMI ST vs POSTc RPMI US	MEST	4.03	0.031	BCL2A1	6.03	< 0.001	CTU2	6.98	0.015	CTD-2561J22.5	-2.88	0.036
S1 POSTc RPMI ST vs POSTc RPMI US	PSMA2	2.12	0.019	FURIN	2.46	0.006	PIGG	-7.79	0.001	CTD-2017D11.1	-2.66	0.013
S1 POSTc RPMI ST vs POSTc RPMI US	AK1	-4.07	0.031	ITGAX	7.5	0.003	LIG4	3.78	0.049	TMEM185A	7.07	0.012
S1 POSTc RPMI ST vs POSTc RPMI US	NSMCE4A	2.6	0.029	RUSF1	-4.8	0.003	BBS1	-7.29	0.007	NBPF9	-2.75	0.003
S1 POSTc RPMI ST vs POSTc RPMI US	GTPBP4	2.1	0.039	MEAK7	-4.8	0.003	ZNF266	-3.71	0.006	H4C15	-3.55	0.009
S1 POSTc RPMI ST vs POSTc RPMI US	PITRM1	2.23	0.017	IRF8	4.06	0.004	NR1D2	-3.82	0.004	H4C14	-3.68	0.015
S1 POSTc RPMI ST vs POSTc RPMI US	MAP3K8	2.35	0.038	GID4	7.07	0.012	PACS1	-2.56	0.039	CTC-523E23.11	-3.54	0.001
S1 POSTc RPMI ST vs POSTc RPMI US	GALK1	7.15	0.009	KSR1	3.69	0.005	PARL	2.31	0.034	ARMCX5-GPRASP2	7.07	0.012
S1 POSTc RPMI ST vs POSTc RPMI US	MRPL27	5.31	< 0.001	C17orf80	-4.6	0.006	PCCA	-3.44	0.035	CCL5	2.02	0.026
S1 POSTc RPMI ST vs POSTc RPMI US	FAM20A	-7.63	0.003	TAF4B	4.48	0.008	PHYKPL	-2.15	0.048	LINC01215	3.39	0.003
S1 POSTc RPMI ST vs POSTc RPMI US	MMD	2.16	0.039	SECTM1	5.96	< 0.001	TBC1D10C	-3.61	0.001	RP11-415F23.2	-2.92	0.023
S1 POSTc RPMI ST vs POSTc RPMI US	DHRS7B	3.87	0.039	PMAIP1	2.79	0.002	UCP2	-2.25	0.026	IER3-AS1	3.38	0.013
S1 POSTc RPMI ST vs POSTc RPMI US	TMEM97	4.1	0.021	PFKL	4.27	< 0.001	FOSL1	5.3	< 0.001	ILRUN-AS1	-4.07	0.031
S1 POSTc RPMI ST vs POSTc RPMI US	RAB34	-5.03	0.001	SCYL1	-2.44	0.048	RUVBL1	3.54	0.004	RP11-440L14.4	-7.04	0.015
S1 POSTc RPMI ST vs POSTc RPMI US	PHF12	-2.43	0.011	CAPN10	3.32	0.035	YES1	4.31	0.002	WDR5B-DT	-2.44	0.048
S1 POSTc RPMI ST vs POSTc RPMI US	NFKB1	2.35	0.01	PSMB6	1.95	0.039	TCP11L1	-3.89	0.008	SAP30-DT	-3.18	0.002
S1 POSTc RPMI ST vs POSTc RPMI US	IL2	5.88	< 0.001	ZNF593	2.5	0.05	SPHK1	7.62	0.002	DGCR5	-3.99	0.039
S1 POSTc RPMI ST vs POSTc RPMI US	GAR1	2.27	0.036	KIAA0319L	-2.28	0.037	LMNB2	2.46	0.044	RP11-386I14.4	2.77	0.014
S1 POSTc RPMI ST vs POSTc RPMI US	CPT1A	2.7	0.009	SERBP1	2.04	0.025	RUFY1	-2.82	0.018	EPOP	3.95	0.031
S1 POSTc RPMI ST vs POSTc RPMI US	CCDC86	3.62	0.006	PRKACB	-4.5	< 0.001	METRNL	4.34	0.001	LINC01138	-2.06	0.043
S1 POSTc RPMI ST vs POSTc RPMI US	CD69	3.15	< 0.001	UCK2	7.15	0.009	TYMS	3.78	< 0.001	CCL4	7.22	< 0.001
S1 POSTc RPMI ST vs POSTc RPMI US	CAPRIN2	-4.54	0.007	XCL1	7.94	< 0.001	TMEM80	-7.36	0.006	AATF	2.18	0.027
S1 POSTc RPMI ST vs POSTc RPMI US	GPN3	2.54	0.013	XCL2	7.45	< 0.001	TALDO1	1.94	0.043	CCL4L2	6.23	< 0.001
S1 POSTc RPMI ST vs POSTc RPMI US	CDKN1B	-2.18	0.027	PFDN2	2.63	0.006	PUS1	3.2	0.023	CCL3L1	9.43	< 0.001
S1 POSTc RPMI ST vs POSTc RPMI US	GTF2H3	3.22	0.012	ABL2	3.44	0.025	ZBED2	3.87	0.039	CCL3-AS1	8.7	< 0.001
S1 POSTc RPMI ST vs POSTc RPMI US	IFNG	10.18	< 0.001	RGS16	3.83	< 0.001	ACAD9	-3.63	0.007	TYW1B	4.36	0.01
S1 POSTc RPMI ST vs POSTc RPMI US	HCFC2	-3.9	0.049	TP53BP2	2.62	0.007	CTD-2201E18.3	-2.43	0.034	CCL3	9.12	< 0.001
S1 POSTc RPMI ST vs POSTc RPMI US	KLRB1	-2.89	0.002	EPHX1	-7.43	0.005	UBE2N	1.93	0.048	PSMB3	2.03	0.029
S1 POSTc RPMI ST vs POSTc RPMI US	PAK1IP1	2.94	0.049	PPFIA4	-4.96	< 0.001	NDUFV2	2.12	0.019	CTB-58E17.1	4.36	0.01
S1 POSTc RPMI ST vs POSTc RPMI US	NEDD9	4.14	0.003	RALB	4.18	0.003	PLEC	2.66	0.01	ACACA	4.1	0.021
S1 POSTc RPMI ST vs POSTc RPMI US	RIPOR2	-2.32	0.011	AMMECR1L	2.86	0.013	MAF	2.54	0.012	RP11-524F11.3	-7.04	0.015
S1 POSTc RPMI ST vs POSTc RPMI US	STK38	-2.83	0.015	HSPD1	2.04	0.024	ZNF552	-3.44	0.035	RP4-742C19.13	-4.15	0.026
S1 POSTc RPMI ST vs POSTc RPMI US	IL17A	5.77	< 0.001	GMPPA	-4.65	0.005	PER1	-3.27	0.001	CH17-172B3.1	-3.91	< 0.001
S1 POSTc RPMI ST vs POSTc RPMI US	IL17F	10.05	< 0.001	TAGLN3	6.98	0.015	GIMAP7	-2.33	0.013	CCDC163	-4.07	0.031
S1 POSTc RPMI ST vs POSTc RPMI US	RNF8	3.25	0.02	PLAC8	-2.36	0.011	MIGA1	-2.9	0.007	LINC01943	3.09	0.003
S1 POSTc RPMI ST vs POSTc RPMI US	CD83	2.38	0.013	TBCK	-2.88	0.025	H2AC6	-4.42	0.012	CH17-195P21.2	-4.02	< 0.001
S1 POSTc RPMI ST vs POSTc RPMI US	SLC29A1	9.66	< 0.001	PIK3R1	-2.97	< 0.001	PRF1	4.06	< 0.001	CH17-118O6.6	-3.95	< 0.001
S1 POSTc RPMI ST vs POSTc RPMI US	HMGCS1	3.45	< 0.001	SSBP2	-2.23	0.038	PPA1	2.08	0.028	RP11-726G1.2	2.26	0.018
S1 POSTc RPMI ST vs POSTc RPMI US	HBEGF	4.42	< 0.001	TNFAIP8	1.93	0.036	ST20	4.93	< 0.001	KB-1995A5.6	2.63	0.009
S1 POSTc RPMI ST vs POSTc RPMI US	HMGCR	2.97	0.003	IL9	9.48	< 0.001	PITPNB	2.51	0.011	CH17-159N18.5	-2.15	0.032
S1 POSTc RPMI ST vs POSTc RPMI US	IL4	7.3	0.006	PCYOX1L	-7.5	0.004	HIGD1A	1.96	0.049	RP11-1077A2.2	2.85	0.036
S1 POSTc RPMI ST vs POSTc RPMI US	TRAPPC13	3.66	0.015	ATXN7L1	-2.79	0.012	ACBD4	-5.11	0.001	NA	NA	NA
S1 POSTc RPMI ST vs T0	FUCA2	-2.88	0.048	KLF2	-4.27	< 0.001	DNAJC18	2.11	0.036	RP11-67K19.3	-2.79	0.015
S1 POSTc RPMI ST vs T0	CYP51A1	2.09	0.037	EMC6	2.02	0.045	MZB1	-2.3	0.013	LINC00271	-3.29	0.017
S1 POSTc RPMI ST vs T0	LAP3	2.16	0.012	TUBA4A	1.78	0.038	NUDT9	-2.34	0.013	HCG18	-2.52	0.003
S1 POSTc RPMI ST vs T0	TMEM176A	-3.95	0.012	SEM1	1.74	0.038	PA2G4	1.92	0.019	KLF3-AS1	-5.75	< 0.001
S1 POSTc RPMI ST vs T0	ICA1	-4.75	0.001	FGL2	-7.22	0.003	PFKFB3	2.54	0.003	AC002451.3	-4.89	< 0.001
S1 POSTc RPMI ST vs T0	ALS2	-2.32	0.012	MTERF1	-4.21	0.007	SERPINB9	2.19	0.008	AC013448.1	-2.9	0.002
S1 POSTc RPMI ST vs T0	TFPI	-3.06	< 0.001	PAICS	2.31	0.006	GTSF1	-6.99	0.007	HLA-DPA1	-2.01	0.024
S1 POSTc RPMI ST vs T0	PLXND1	-5.02	< 0.001	SDF2L1	2.62	0.005	DPY19L2P2	-2.52	0.007	PDE4DIPP6	-4.13	0.001
S1 POSTc RPMI ST vs T0	AK2	2.44	0.004	ATF4	2.5	0.002	ACYP2	-2.33	0.017	RP1-27K12.2	-2.18	0.021
S1 POSTc RPMI ST vs T0	FKBP4	3.66	0.01	MPST	3.19	0.003	KYAT1	-3.8	0.02	EMBP1	-3.17	0.009
S1 POSTc RPMI ST vs T0	ST7	7.37	0.003	FOXP2	-7.76	< 0.001	OR2M4	-2.95	0.018	RP11-310E22.7	-3.41	0.004
S1 POSTc RPMI ST vs T0	HCCS	2.97	0.005	CHN1	-7.29	0.003	PGAM1	2.48	0.004	RP3-428L16.1	-4.33	0.005
S1 POSTc RPMI ST vs T0	MSL3	1.8	0.03	ARHGAP22	-2.5	0.014	CLCN5	-3.54	0.041	DARS1-AS1	-3.16	< 0.001
S1 POSTc RPMI ST vs T0	ITGAL	-1.67	0.048	CHAC1	5.17	< 0.001	MRPL36	2	0.03	LEF1-AS1	-7.9	< 0.001
S1 POSTc RPMI ST vs T0	PDK2	-2.79	0.031	TXNDC17	2.2	0.009	ZNF561	-4.75	0.001	SILC1	-3.12	< 0.001
S1 POSTc RPMI ST vs T0	TNFRSF12A	4.95	0.001	DAD1	1.78	0.032	BCL2L1	1.95	0.034	LINC01697	-4.21	0.007
S1 POSTc RPMI ST vs T0	ARHGAP44	-6.81	0.012	ARHGEF6	-2.46	0.008	OR2AT4	-3.07	< 0.001	CTD-2619J13.14	-2.35	0.012
S1 POSTc RPMI ST vs T0	PROM1	-6.9	0.009	FGF13	-2.57	0.011	ANO5	-7.99	< 0.001	LINC01873	-2.93	0.001
S1 POSTc RPMI ST vs T0	CEACAM21	-5.3	< 0.001	CDKN1C	-6.81	0.012	ZNF570	-2.56	0.034	IGHV3-43	-3.99	0.002
S1 POSTc RPMI ST vs T0	ST7L	-4.06	0.001	MAU2	-2.48	0.012	NINJ2	-7.54	0.001	LINC02043	-1.79	0.04
S1 POSTc RPMI ST vs T0	MYLIP	-2.21	0.027	SYT5	-7.22	0.003	MAL	-3.1	< 0.001	FAM215B	-3.05	0.013
S1 POSTc RPMI ST vs T0	CDKL5	-2.83	0.001	ERMARD	-8.29	< 0.001	OR1A1	-2.98	< 0.001	RP11-103C3.1	-6.81	0.012
S1 POSTc RPMI ST vs T0	MGST1	-7.15	0.004	NXNL2	-3.63	0.002	SNTB1	-7.49	0.002	MHENCR	-7.81	< 0.001
S1 POSTc RPMI ST vs T0	TENM1	-7.9	< 0.001	SAT1	2.29	0.005	CLEC7A	-8.18	< 0.001	KANTR	-2.67	0.043
S1 POSTc RPMI ST vs T0	FAM76A	-3.35	0.014	LDLR	1.97	0.022	NEGR1	-2.22	0.032	LINC00665	-2.17	0.013
S1 POSTc RPMI ST vs T0	ETV7	7.98	< 0.001	CDC16	-2.09	0.048	SPTLC3	-3.86	< 0.001	RP11-47I22.3	-2.39	0.007
S1 POSTc RPMI ST vs T0	EEF1AKNMT	3.96	0.025	SNX9	4.37	< 0.001	OR5A1	-2.94	0.001	TNF	5.34	< 0.001
S1 POSTc RPMI ST vs T0	STARD3NL	2.41	0.022	RTN4IP1	-4.09	0.008	OR5A2	-2.26	0.017	LINC00342	-1.96	0.019
S1 POSTc RPMI ST vs T0	IFFO1	-6.65	< 0.001	STK33	-2.43	0.012	GNB2	1.74	0.039	SNHG15	1.95	0.018
S1 POSTc RPMI ST vs T0	PHF7	-4.43	0.003	FCHO1	-2.15	0.043	ARNT2	-7.22	0.003	LINC01722	-3.36	< 0.001
S1 POSTc RPMI ST vs T0	NISCH	-2.78	0.002	IQCN	-2.14	0.016	FGGY	-7.81	< 0.001	LINC00884	-2.16	0.016
S1 POSTc RPMI ST vs T0	MKS1	-3.41	0.004	ADRM1	3.32	< 0.001	MAB21L4	-3.61	0.006	CCDC144NL-AS1	-2.95	0.005
S1 POSTc RPMI ST vs T0	LARS2	-3.35	0.014	SESN2	2.64	0.046	ZFAND4	-4.38	0.004	LINC00702	-3.13	0.006
S1 POSTc RPMI ST vs T0	PLAUR	1.81	0.035	MED18	3.84	0.006	THEMIS	-5.71	< 0.001	RP3-468B3.2	-2.27	0.046
S1 POSTc RPMI ST vs T0	WIZ	4.05	0.02	MPP1	-2.45	0.017	SLFN11	3.51	0.001	RP11-421L21.3	-5.46	< 0.001
S1 POSTc RPMI ST vs T0	ZBTB32	8.93	< 0.001	SYNE1	-2.88	0.001	LRRC20	-6.81	0.012	AC007743.1	-2.84	< 0.001
S1 POSTc RPMI ST vs T0	TYROBP	-2.16	0.009	ULBP3	-2.43	0.006	OR4D9	-2.91	0.01	CHRM3-AS2	-3.47	0.002
S1 POSTc RPMI ST vs T0	TMEM159	-1.97	0.046	LILRB2	-4.21	0.007	RAB37	-10.19	< 0.001	CNIH3-AS2	-2.47	0.043
S1 POSTc RPMI ST vs T0	BRCA1	-7.29	0.003	ARHGEF9	-2.21	0.013	CES3	-4.58	0.002	STXBP5-AS1	-3.54	0.041
S1 POSTc RPMI ST vs T0	CALCOCO1	-2.29	0.014	NAPSB	-4.75	0.001	DMXL1	-2.09	0.036	LINC01683	-7.81	< 0.001
S1 POSTc RPMI ST vs T0	MAN2B2	-2.55	0.034	TUBG1	2.36	0.009	NBEA	-6.99	0.007	RNASEH2B-AS1	-2.86	0.007
S1 POSTc RPMI ST vs T0	MAMLD1	4.95	0.001	PSMC3IP	3.72	0.008	LCLAT1	-2.17	0.011	SLC26A4-AS1	-3.34	< 0.001
S1 POSTc RPMI ST vs T0	TACC3	-4.51	< 0.001	C1orf159	-3.29	0.017	MIR4435-2HG	2.75	0.001	MIR4280HG	-2.33	0.01
S1 POSTc RPMI ST vs T0	CAPN1	-2.35	0.015	NINJ1	4.59	< 0.001	ZNF680	-2.88	0.048	LINC01503	-3.23	0.021
S1 POSTc RPMI ST vs T0	MDH1	1.83	0.027	CA6	-5.24	< 0.001	DELEC1	-1.99	0.049	LINC01761	-2.79	0.015
S1 POSTc RPMI ST vs T0	PLEKHB1	-5.67	< 0.001	CHSY1	3.57	0.003	COQ2	-7.07	0.005	LINC01694	-2.67	0.043
S1 POSTc RPMI ST vs T0	TYMP	4.46	< 0.001	GCH1	5.83	< 0.001	TRMT112	1.86	0.022	RP11-305F18.1	-2.82	< 0.001
S1 POSTc RPMI ST vs T0	TOMM34	2.77	0.034	SPATA6	-3.72	0.025	LRRN3	-3.81	< 0.001	RP11-308D16.2	-3.72	0.025
S1 POSTc RPMI ST vs T0	FAS	2.16	0.013	CCT6B	-3.55	0.001	ESRRA	4.37	0.008	AC074117.10	-2.58	0.005
S1 POSTc RPMI ST vs T0	BTN3A1	-2.07	0.014	TRIM5	-2.87	0.012	CYSLTR1	-2.58	0.002	AC009264.1	-3.03	0.032
S1 POSTc RPMI ST vs T0	PRKCH	-1.85	0.033	MRPL35	2.77	0.034	PARP15	-3.52	< 0.001	ZNF37BP	-1.97	0.028
S1 POSTc RPMI ST vs T0	SH2D2A	2.87	0.001	ILKAP	-2.95	0.004	CKS1B	2.29	0.011	LINC01934	-5.55	< 0.001
S1 POSTc RPMI ST vs T0	ANK1	-3.88	0.015	RAP1GAP2	-8.6	< 0.001	AHSA2P	-2.8	0.002	LERFS	-7.42	0.002
S1 POSTc RPMI ST vs T0	APBA2	-5.15	< 0.001	SEC61G	2.23	0.006	MAB21L3	-2.84	< 0.001	LINC02817	-4.87	< 0.001
S1 POSTc RPMI ST vs T0	SH3YL1	-3.72	< 0.001	GRSF1	2.33	0.028	ZNF483	-4.67	0.001	RP11-90C4.1	-2.68	0.026
S1 POSTc RPMI ST vs T0	TIMP2	-2.46	0.021	JCHAIN	-3.19	< 0.001	MAP3K11	-4.27	0.006	MIR155HG	10.53	< 0.001
S1 POSTc RPMI ST vs T0	CYP46A1	-2.95	0.001	KDM6B	2.03	0.027	KCNK7	-7.07	0.005	SOX9-AS1	-2.42	0.04
S1 POSTc RPMI ST vs T0	CASR	-2.22	0.032	XAF1	-2.14	0.012	FKBP2	2.11	0.01	C12orf75	-3.32	0.002
S1 POSTc RPMI ST vs T0	METTL1	3.39	0.026	FLOT2	-2.97	0.001	SULT1B1	-2.53	0.002	RP11-70C1.3	2.39	0.039
S1 POSTc RPMI ST vs T0	VCAN	-9.51	< 0.001	PCED1A	-4.91	< 0.001	TRAPPC3L	-2.33	0.008	LINC01278	-3.33	0.003
S1 POSTc RPMI ST vs T0	INPP4A	-3	0.001	NASP	1.76	0.035	RCE1	3.53	0.006	CASP4LP	-4.43	0.003
S1 POSTc RPMI ST vs T0	PSMA4	1.73	0.035	PPP1R3D	3.14	0.048	GNG5	1.76	0.033	HIPK1-AS1	-4.09	0.008
S1 POSTc RPMI ST vs T0	PARP3	-7.65	< 0.001	PATJ	-4.2	< 0.001	C9orf131	-7.15	0.004	FBXO30-DT	-3.45	< 0.001
S1 POSTc RPMI ST vs T0	SPATA7	-7.81	< 0.001	FBXO44	-2.2	0.034	PIGG	-9.24	< 0.001	LINC00345	-3.03	0.003
S1 POSTc RPMI ST vs T0	TRIT1	3.53	0.006	ATP8A2	-7.15	0.004	LIG4	7.13	0.005	LINC00894	-3.54	0.041
S1 POSTc RPMI ST vs T0	CUL7	-2.85	0.025	POMP	2.45	0.003	GTF2IRD2B	-2.35	0.012	AL109767.1	-6.9	0.009
S1 POSTc RPMI ST vs T0	CTNNA1	2.57	0.021	DSTYK	-2.4	0.026	SNAPC5	-2.18	0.039	OLMALINC	-3.1	< 0.001
S1 POSTc RPMI ST vs T0	CTPS2	-4.15	0.008	TBC1D8B	-3.63	< 0.001	BBS1	-7.29	0.003	RBMS3-AS3	-4.47	< 0.001
S1 POSTc RPMI ST vs T0	SCML1	4.22	0.012	TCEAL4	1.77	0.042	ZNF266	-3.92	< 0.001	ZNF815P	-9.09	< 0.001
S1 POSTc RPMI ST vs T0	HDAC9	-3.46	0.01	PLAAT4	-2.24	0.009	RESF1	-1.8	0.039	LINC01814	-1.98	0.026
S1 POSTc RPMI ST vs T0	NOP16	2.19	0.009	MORC2	-2.52	0.038	NR1D2	-3.53	0.003	COX10-AS1	-1.95	0.028
S1 POSTc RPMI ST vs T0	SNX29	-2.73	0.036	LARGE1	-7.71	< 0.001	FAM241A	-2.55	0.002	AC006369.2	-2.95	0.039
S1 POSTc RPMI ST vs T0	ERCC8	-3.23	0.007	SLC2A11	-4.98	< 0.001	HRAS	-3.88	0.015	AC013463.2	-2.67	0.043
S1 POSTc RPMI ST vs T0	PER3	-3.51	0.008	AMPD3	-2.88	0.048	PDZK1	-3.95	0.012	RP11-525G13.2	-2.95	0.005
S1 POSTc RPMI ST vs T0	UTS2	-2.67	0.043	HSD17B4	-2.38	0.007	ADGRE1	-7.85	< 0.001	MFF-DT	-3.69	0.001
S1 POSTc RPMI ST vs T0	TNFRSF9	6.66	< 0.001	MRPS36	1.69	0.046	C3orf33	-6.9	0.009	AC107081.5	3.31	0.006
S1 POSTc RPMI ST vs T0	ARID1B	-2.1	0.016	LAMTOR5	1.76	0.032	KLC2	3.72	0.008	LINC01695	-3.35	0.014
S1 POSTc RPMI ST vs T0	LIMA1	2.92	0.001	CEPT1	-3.15	0.002	ATR	-2.61	0.005	HNRNPA1P54	-2.43	0.005
S1 POSTc RPMI ST vs T0	SLC4A8	-6.9	0.009	ARF3	2.69	0.007	MRPS22	1.97	0.019	PRKG1-AS1	-2.14	0.011
S1 POSTc RPMI ST vs T0	MAPK9	-2.59	0.013	YWHAQ	2.42	0.004	PACS1	-2.59	0.018	RP11-69I8.2	-3.78	< 0.001
S1 POSTc RPMI ST vs T0	RAD51	-7.22	0.003	RSAD2	3.85	< 0.001	ABO	-2.43	0.05	ANKRD20A7P	-4.67	0.001
S1 POSTc RPMI ST vs T0	PLEKHA5	-2.83	0.013	LDHA	2.94	< 0.001	DDIT3	2.77	0.001	NIFK-AS1	4.42	< 0.001
S1 POSTc RPMI ST vs T0	MSMO1	3.02	0.002	IL6ST	-1.93	0.019	ZNF519	-2.52	0.038	RP11-544A12.4	-3.03	0.032
S1 POSTc RPMI ST vs T0	MCF2L2	-3.87	0.002	NAV1	-3.63	0.032	CLTB	2.71	0.039	CTDSPL2P1	-3.46	0.01
S1 POSTc RPMI ST vs T0	AP5M1	-1.95	0.05	NARS1	2.02	0.013	TBC1D10C	-4.13	< 0.001	NR2F1-AS1	-2.35	0.029
S1 POSTc RPMI ST vs T0	ANAPC4	-1.9	0.034	IL2RA	4.66	< 0.001	ALG10B	-3.23	0.007	GS1-124K5.4	-4.63	0.002
S1 POSTc RPMI ST vs T0	TRAF1	2.81	0.001	IL15RA	8.95	< 0.001	UCP2	-3.65	< 0.001	LINC01358	-1.9	0.023
S1 POSTc RPMI ST vs T0	TRAF3IP2	-3.1	0.011	TMEM241	-2.18	0.019	FOSL1	8.64	< 0.001	AL163953.3	-4.02	0.01
S1 POSTc RPMI ST vs T0	MTA3	-3.07	0.007	ACP2	1.94	0.039	LINC00476	-3.61	0.006	ZNF737	-2.22	0.032
S1 POSTc RPMI ST vs T0	USP13	-4.38	0.004	RTL8C	3.31	0.032	LINC02694	-2.58	0.005	RGL2	-3.63	0.032
S1 POSTc RPMI ST vs T0	FLYWCH1	-2.05	0.032	RAB33A	3.96	0.025	MSRA	-4.27	0.006	RP11-554F20.1	-3.35	< 0.001
S1 POSTc RPMI ST vs T0	UNKL	-2.53	0.02	YARS1	2.89	< 0.001	B3GALT6	3.12	0.001	RP5-947P14.1	-2.74	0.018
S1 POSTc RPMI ST vs T0	ALDH18A1	2.25	0.04	RNF138	-2.06	0.039	JAKMIP2	-3.63	0.032	LINC01684	-3.74	< 0.001
S1 POSTc RPMI ST vs T0	TARBP1	-3.61	0.006	SLC43A3	3.14	< 0.001	YES1	2.49	0.016	LINC01409	-3.21	0.004
S1 POSTc RPMI ST vs T0	GATB	-4.15	0.008	DZIP1	-2.47	0.043	TCP11L1	-3.75	0.004	WAKMAR2	-3.36	0.002
S1 POSTc RPMI ST vs T0	GNA15	5.05	< 0.001	BIVM	-2.83	0.008	SPHK1	7.77	< 0.001	SHISA9	-2.96	< 0.001
S1 POSTc RPMI ST vs T0	BCAT1	4.78	< 0.001	CTSL	4.42	< 0.001	BNIP3	3.8	< 0.001	RP13-143G15.4	-1.89	0.031
S1 POSTc RPMI ST vs T0	TNK2	-2.2	0.024	PSAT1	3.18	0.002	RTTN	-3.14	< 0.001	LINC02245	-7.15	0.004
S1 POSTc RPMI ST vs T0	LTK	-6.81	0.012	ADAM19	1.9	0.026	OR4K17	-4.33	0.005	AC002075.4	-1.97	0.045
S1 POSTc RPMI ST vs T0	VMP1	1.7	0.039	TRAFD1	1.89	0.045	ACBD7	-2.6	0.03	FAM200B	-3.05	< 0.001
S1 POSTc RPMI ST vs T0	POLD1	4.14	0.015	CD36	-7.07	0.005	B3GNT4	3.23	0.039	AC003075.4	-3.54	0.041
S1 POSTc RPMI ST vs T0	SLC6A16	-4.21	0.007	HILPDA	9.31	< 0.001	CDC26	2.07	0.023	AC073130.1	-3.38	0.002
S1 POSTc RPMI ST vs T0	LIMCH1	-7.49	0.002	CD63	2.4	0.003	OR5AN1	-5.51	< 0.001	NFIA-AS2	-2.04	0.015
S1 POSTc RPMI ST vs T0	TM7SF3	-2.73	0.036	CDK4	1.89	0.045	LMNB2	2.24	0.032	FLG-AS1	-2.95	0.018
S1 POSTc RPMI ST vs T0	TSPAN32	-4.95	< 0.001	PAN2	-4.43	0.003	OR4F17	-4	< 0.001	KCNMB2-AS1	-3.53	< 0.001
S1 POSTc RPMI ST vs T0	CNN2	-2.45	0.003	CCT7	2.19	0.007	OR51L1	-7.65	< 0.001	GOLGA2P5	-4.67	0.001
S1 POSTc RPMI ST vs T0	FAR2	-3.54	0.041	FHOD1	2.1	0.038	METRNL	5.54	< 0.001	LINC01410	-5.21	< 0.001
S1 POSTc RPMI ST vs T0	CHI3L2	-8.45	< 0.001	ZNF670-ZNF695	-3.23	0.007	GCNT4	-4.15	0.008	LINC00426	-3.95	0.012
S1 POSTc RPMI ST vs T0	PMS1	-2.44	0.009	TAF5L	-2.44	0.01	TMEM80	-7.42	0.002	PAXBP1-AS1	-2.03	0.024
S1 POSTc RPMI ST vs T0	ZNF76	-2.06	0.045	SERPINE2	3.35	0.001	POLE	-3.57	0.002	RNY4P25	-7.29	0.003
S1 POSTc RPMI ST vs T0	DGKA	-2.86	< 0.001	ARMC9	-2.85	0.025	EPS8L2	2.36	0.019	CASTOR3	-8.42	< 0.001
S1 POSTc RPMI ST vs T0	ADAT1	-2.59	0.013	TSGA10	-5.05	< 0.001	FAM210A	2	0.046	NME1	2.3	0.005
S1 POSTc RPMI ST vs T0	CYB5R4	-2.09	0.031	EDAR	-7.94	< 0.001	OR2T12	-3.66	0.005	RPL21P39	-3.29	0.017
S1 POSTc RPMI ST vs T0	GSTO2	-2.51	0.012	RNASEH2B	-1.93	0.028	OR2T33	-2.9	0.009	IGKV1D-8	-6.9	0.009
S1 POSTc RPMI ST vs T0	TLE2	-7.36	0.002	ITM2B	-1.89	0.023	HIC1	7.37	0.003	IGKV1-6	-3.14	0.01
S1 POSTc RPMI ST vs T0	TBC1D1	-2.19	0.022	RCBTB2	-9	< 0.001	ZBED2	4.14	0.015	IGKV3-20	-2.76	0.002
S1 POSTc RPMI ST vs T0	MTHFD2	3.3	< 0.001	IL6	7.52	0.002	ATOX1	1.77	0.041	LILRA2	-7.07	0.005
S1 POSTc RPMI ST vs T0	PDE4A	3.67	0.004	LIMD2	-1.85	0.03	CASC2	-2.47	0.043	AMY2B	-5.94	< 0.001
S1 POSTc RPMI ST vs T0	SMARCD1	2.41	0.011	BRIP1	-2.15	0.012	ACAD9	-3.97	< 0.001	ERICH6-AS1	-2.52	0.038
S1 POSTc RPMI ST vs T0	KDM4A	-3.03	0.032	SCN2A	-4.38	0.004	NAALADL2	-3.88	0.015	ZNF542P	-4.16	< 0.001
S1 POSTc RPMI ST vs T0	ASPM	-6.99	0.007	ERMN	4.22	0.012	ALS2CL	-7.36	0.002	SOCAR	5.64	< 0.001
S1 POSTc RPMI ST vs T0	CD84	-2.59	0.009	IL1RN	2.23	0.015	NDUFV2	3.12	< 0.001	IGKV1-17	-2.79	0.015
S1 POSTc RPMI ST vs T0	POLR1H	1.79	0.033	TXN	3.96	< 0.001	GK4P	7.58	0.001	CDKN2B-AS1	-3.63	< 0.001
S1 POSTc RPMI ST vs T0	FGFR2	-7.07	0.005	KLF4	-7.49	0.002	ZC3H12D	2.01	0.015	IGKV1-16	-7.71	< 0.001
S1 POSTc RPMI ST vs T0	PFKP	2	0.015	STXBP1	-6.81	0.012	SLC25A20	-2.28	0.021	MIF	2.45	0.003
S1 POSTc RPMI ST vs T0	CACNB1	4.69	0.003	DPM2	2.06	0.036	ERBB4	-7.07	0.005	RP11-10O22.1	-2.27	0.015
S1 POSTc RPMI ST vs T0	PKM	2.39	0.003	TSTD2	-4.09	0.008	MAF	1.96	0.032	IGKV1D-16	-4.71	0.001
S1 POSTc RPMI ST vs T0	NAV3	-3.8	0.02	PLAA	-2.79	0.031	PARP10	-6.99	0.007	LINC02614	-4.71	0.001
S1 POSTc RPMI ST vs T0	FTSJ1	2.24	0.021	IL11RA	-9.39	< 0.001	C5orf64	-2.95	< 0.001	IGKV2-24	-6.9	0.009
S1 POSTc RPMI ST vs T0	PRR11	-2.5	0.039	RNF38	-2.5	0.005	CTC1	-2.05	0.021	SUCLG2-AS1	-2.34	0.005
S1 POSTc RPMI ST vs T0	RASGRP2	-3.8	< 0.001	KLC4	-4.63	0.002	FBXO34	-8.22	< 0.001	IGKV3-11	-3.27	< 0.001
S1 POSTc RPMI ST vs T0	IFT80	-2.22	0.032	IRF4	5.77	< 0.001	PER1	-2.65	0.004	LINC01192	-4.87	< 0.001
S1 POSTc RPMI ST vs T0	ABCC9	-3	< 0.001	TUBB2A	2.17	0.039	FARSA	2.02	0.029	GUSBP2	-2.99	0.009
S1 POSTc RPMI ST vs T0	NEDD4	-2.75	0.002	IER3	5.53	< 0.001	LINC00670	-2.89	0.002	ZBTB20-AS1	-3.8	0.02
S1 POSTc RPMI ST vs T0	GNB5	-2.91	0.01	CPEB2	-7.76	< 0.001	SEPHS2	2.94	0.021	RP11-34P13.9	-6.81	0.012
S1 POSTc RPMI ST vs T0	RAB27A	2.26	0.012	IL18BP	-2.41	0.014	LINC00652	-2.56	0.005	XACT	-3.16	< 0.001
S1 POSTc RPMI ST vs T0	PTPN3	-7.22	0.003	LRRC32	7.98	< 0.001	DCTPP1	2.43	0.011	IGKV1-9	-4.61	< 0.001
S1 POSTc RPMI ST vs T0	TMEM260	-2.45	0.036	SORL1	-4.22	< 0.001	ZADH2	-2.73	0.036	C8orf58	-7.22	0.003
S1 POSTc RPMI ST vs T0	ASNS	2.58	0.005	BUD13	2.15	0.032	EXOC3	2.08	0.017	RP11-34P13.13	-3.2	0.002
S1 POSTc RPMI ST vs T0	PABPC1	1.76	0.03	YAP1	-7.29	0.003	FAHD1	-3.8	0.02	CTC-340A15.2	-2.94	< 0.001
S1 POSTc RPMI ST vs T0	MGAT4A	-1.87	0.038	RDX	2.61	0.002	SLC9A4	-4.29	< 0.001	HYPK	1.99	0.016
S1 POSTc RPMI ST vs T0	ARHGAP10	-4.27	0.006	SQOR	1.78	0.041	ARHGAP45	-2.25	0.006	TCP10L	-2.74	0.006
S1 POSTc RPMI ST vs T0	TRIB2	-3.13	0.01	MAPKBP1	-3.29	0.017	ZNF571	-2.6	0.03	IGKV1-39	-4.05	< 0.001
S1 POSTc RPMI ST vs T0	RDH11	2.6	0.006	KNL1	-3.95	0.012	MIGA1	-2.73	0.005	EIF6	2.22	0.006
S1 POSTc RPMI ST vs T0	ZFYVE26	-4.98	< 0.001	PARP6	-2.89	0.013	D2HGDH	-1.8	0.033	LINC01206	-3.2	< 0.001
S1 POSTc RPMI ST vs T0	EPN2	3.62	0.005	SLC28A2	-3.25	0.002	FAM83H	-4.02	0.01	LINC00960	-3.46	0.004
S1 POSTc RPMI ST vs T0	LIMS2	-6.99	0.007	TTLL7	-6.81	0.012	ST20	4.64	< 0.001	IGKV2D-28	-2.78	0.007
S1 POSTc RPMI ST vs T0	SPEG	-5.67	< 0.001	ARHGAP29	-3.61	0.006	SLC25A42	-2.88	0.048	HLA-DMB	-4.53	< 0.001
S1 POSTc RPMI ST vs T0	UBE2D1	2.24	0.032	IFI44	-4.79	< 0.001	HLA-V	-2.9	0.021	RP11-54O7.14	4.73	< 0.001
S1 POSTc RPMI ST vs T0	CHFR	-2.47	0.024	IFT172	-5.05	< 0.001	TMEM45A	-2.17	0.009	CCDC169	-3.97	< 0.001
S1 POSTc RPMI ST vs T0	ACAP1	-1.87	0.035	PREPL	-2.5	0.008	FANCB	-7.81	< 0.001	RP11-716O23.2	-2.56	0.005
S1 POSTc RPMI ST vs T0	XRCC1	-2.06	0.039	TACC2	-3	0.002	ZBTB20	-2.49	0.005	LINC00882	-3.19	< 0.001
S1 POSTc RPMI ST vs T0	PDE8A	-3.63	0.032	EXOC6	-2.04	0.032	OR5AS1	-3.48	< 0.001	SOX2-OT	-3.72	0.001
S1 POSTc RPMI ST vs T0	PTGS2	2.97	< 0.001	CARF	-2.72	0.014	RFX7	-7.49	0.002	RP11-285F7.2	-3.7	0.004
S1 POSTc RPMI ST vs T0	FRY	-5.12	< 0.001	IDH1	-7.15	0.004	ZNF329	-4.21	0.007	ERVW-1	-2.14	0.015
S1 POSTc RPMI ST vs T0	EED	2.12	0.011	COX17	2.7	0.001	ZNF101	-2.15	0.016	IGKV3-7	-3.1	0.026
S1 POSTc RPMI ST vs T0	LMAN1	2.47	0.006	PPCDC	-3.29	0.017	RTKN2	-2.87	0.012	ARHGEF26-AS1	-2.79	0.002
S1 POSTc RPMI ST vs T0	ZZEF1	-2.27	0.046	FAM13A	-9.22	< 0.001	MGAT4C	-3.55	0.002	KCTD7	-2.04	0.037
S1 POSTc RPMI ST vs T0	ENO1	3.28	< 0.001	HERC6	-2.88	0.048	NOP10	2.7	0.001	IGKV1-5	-2.6	0.006
S1 POSTc RPMI ST vs T0	TXK	-2.26	0.023	HERC5	-2.73	0.036	ERCC6L2	-2.15	0.017	WDR86-AS1	-7.36	0.002
S1 POSTc RPMI ST vs T0	FOSL2	2.56	0.01	KIAA1109	-2.02	0.024	TP53TG1	-5.44	< 0.001	MRPS6	2.07	0.011
S1 POSTc RPMI ST vs T0	RAB7A	1.63	0.049	PRDM5	-3.29	0.017	UBA7	-3.23	< 0.001	PPIEL	-3.27	0.002
S1 POSTc RPMI ST vs T0	SEC31B	-2.61	0.043	SEPTIN11	2.03	0.027	SHISAL2A	-3.66	0.005	NFS1	-3.05	0.013
S1 POSTc RPMI ST vs T0	ARHGAP15	-2.16	0.013	LEF1	-4.12	< 0.001	FAM153B	-4.67	0.001	LINC01011	-4.09	0.008
S1 POSTc RPMI ST vs T0	UNG	-2.61	0.043	RGS3	3.86	0.032	AP1S2	-1.82	0.049	IGKV2-28	-2.74	0.008
S1 POSTc RPMI ST vs T0	SPAG5	4.07	< 0.001	KLRG1	-3.95	< 0.001	CACNB4	-6.99	0.007	LINC01322	-4.63	0.002
S1 POSTc RPMI ST vs T0	ACACB	-3.99	0.002	CD27	-4.32	< 0.001	KPNA2	1.97	0.019	IGKV3-15	-3.28	< 0.001
S1 POSTc RPMI ST vs T0	PAG1	-2.86	0.003	TPH2	-2.21	0.036	SPNS3	-2.79	0.015	RP11-506M13.3	-3.35	0.014
S1 POSTc RPMI ST vs T0	MBNL3	-3.63	0.032	PHLDA1	4.07	< 0.001	TSPAN10	-3.23	0.021	HBB	-7.54	0.001
S1 POSTc RPMI ST vs T0	NFKB2	2.24	0.01	SLC7A1	3.33	< 0.001	PLCB1	-5.05	< 0.001	LIFR-AS1	-6.99	0.007
S1 POSTc RPMI ST vs T0	MCCC1	-4.67	0.001	CCDC65	-7.94	< 0.001	TMEM198B	-4.67	0.001	LINC00847	-4.71	0.001
S1 POSTc RPMI ST vs T0	RBFOX1	-6.81	0.012	CSAD	-2.93	0.005	CNOT10	-2.28	0.035	MALINC1	-3.13	0.01
S1 POSTc RPMI ST vs T0	MLLT10	-2.1	0.012	ESYT1	-1.95	0.044	C12orf60	-5.12	< 0.001	LINC00861	-5.44	< 0.001
S1 POSTc RPMI ST vs T0	TNRC6C	-2.21	0.012	VPS33A	-2.26	0.033	PYCR1	7.93	< 0.001	RP11-10K16.1	-3.94	< 0.001
S1 POSTc RPMI ST vs T0	CBFA2T2	-4.58	0.002	RTN1	-7.07	0.005	NEB	-6.9	0.009	LINC00461	-3.72	0.025
S1 POSTc RPMI ST vs T0	SDF4	2.93	< 0.001	GPR65	2.4	0.012	HSP90AB3P	3.51	0.001	RP11-712B9.2	-2.24	0.007
S1 POSTc RPMI ST vs T0	RUNX1T1	-7.9	< 0.001	SLC24A4	-3.54	0.041	POTEC	-9.29	< 0.001	DRAIC	-6.81	0.012
S1 POSTc RPMI ST vs T0	THOC1	1.74	0.046	WARS1	2.62	0.002	GDPGP1	-4.98	< 0.001	LINC01184	-3.27	0.006
S1 POSTc RPMI ST vs T0	FKBP7	-4.53	0.002	MFAP1	2.3	0.038	BCOR	5.77	< 0.001	SEPTIN7P14	-2.83	0.013
S1 POSTc RPMI ST vs T0	CDC14A	-2.31	0.018	DUOX2	-2.82	0.016	OR56A4	-3.16	< 0.001	LINC01550	-5.1	< 0.001
S1 POSTc RPMI ST vs T0	FDFT1	1.77	0.032	BCL2A1	5.18	< 0.001	MX2	-3.32	< 0.001	SBF2-AS1	-2.75	0.002
S1 POSTc RPMI ST vs T0	OPHN1	-2.98	< 0.001	DNAJA4	8.08	< 0.001	HMCES	3.62	< 0.001	EXTL3-AS1	-7.76	< 0.001
S1 POSTc RPMI ST vs T0	PGM1	2.98	0.036	HAPLN3	2.62	0.021	ZNF530	-3.35	0.014	LACTB2-AS1	-2.79	0.015
S1 POSTc RPMI ST vs T0	RFX3	-2.74	0.018	NTRK3	-3.51	0.008	LIN9	-3.54	0.041	RP11-461O7.1	-2.04	0.032
S1 POSTc RPMI ST vs T0	SLC4A4	-7.81	< 0.001	FURIN	5.47	< 0.001	TTC32	-1.97	0.027	SNHG10	-8.18	< 0.001
S1 POSTc RPMI ST vs T0	SESN1	-6.01	< 0.001	RUSF1	-4.91	< 0.001	SDR42E2	-7.65	< 0.001	MIR210HG	5	0.001
S1 POSTc RPMI ST vs T0	PUM3	2.84	0.001	FTO	-2	0.018	FAM120C	-6.9	0.009	CTD-2260A17.2	-4.38	0.004
S1 POSTc RPMI ST vs T0	CPB2	-2.67	0.01	MYLK3	-2.82	0.005	OR1D2	-3.91	< 0.001	RP11-373N22.3	-2.92	< 0.001
S1 POSTc RPMI ST vs T0	CPOX	2.1	0.038	ZFHX3	-6.81	0.012	SCFD2	3.72	0.008	ZBED5-AS1	-2.05	0.032
S1 POSTc RPMI ST vs T0	HSP90AA1	1.67	0.042	NLRC5	-2.04	0.014	TSPYL2	1.77	0.043	CTC-441N14.2	-3.03	0.005
S1 POSTc RPMI ST vs T0	CXCL2	4.89	< 0.001	C17orf80	-4.15	0.008	C11orf72	-2.5	0.039	TWF2	1.83	0.027
S1 POSTc RPMI ST vs T0	TCF7	-4.32	< 0.001	TOB1	-2.29	0.005	POU6F1	-7.85	< 0.001	STX18-AS1	-2.84	< 0.001
S1 POSTc RPMI ST vs T0	MEF2C	-8.73	< 0.001	BCAS3	-5.71	< 0.001	CLECL1	4.13	0.002	CTD-2366F13.1	-4.7	< 0.001
S1 POSTc RPMI ST vs T0	AACS	-2.88	0.048	PTRH2	2.6	0.004	PLA2G6	-3.05	0.013	TMEM161B-AS1	-1.87	0.03
S1 POSTc RPMI ST vs T0	ATP8B1	-4.53	0.002	SLC39A6	1.96	0.035	ZFP1	7.21	0.004	FAM13A-AS1	-7.6	0.001
S1 POSTc RPMI ST vs T0	IL12RB2	3.74	< 0.001	ASXL3	-7.42	0.002	SOCS3	1.98	0.036	UBA6-AS1	-3.07	0.001
S1 POSTc RPMI ST vs T0	FYB1	-3.97	< 0.001	PELP1	1.95	0.038	PIWIL3	-6.81	0.012	NNT-AS1	-2.03	0.019
S1 POSTc RPMI ST vs T0	BZW1	1.64	0.049	SLC14A1	-7.29	0.003	NELL2	-3.42	< 0.001	LINC02268	-3.01	< 0.001
S1 POSTc RPMI ST vs T0	DLG3	-2.6	0.029	PIK3R5	-2.04	0.036	KRBA2	-2.88	0.048	LUCAT1	2.75	0.001
S1 POSTc RPMI ST vs T0	NFE2L1	2.07	0.017	TMC6	-2.89	< 0.001	ZNF93	-2.88	0.048	LINC00504	-2.41	0.003
S1 POSTc RPMI ST vs T0	TDRD3	-9.24	< 0.001	SLC16A3	3.48	< 0.001	ZBTB40	-2.37	0.022	RP11-553P9.2	-2.61	0.043
S1 POSTc RPMI ST vs T0	ZNF671	-3.63	0.032	RPTOR	2.44	0.016	SATL1	-3.27	0.002	RP4-598P13.1	-2.28	0.021
S1 POSTc RPMI ST vs T0	SLCO1A2	-2.45	0.036	SECTM1	6.23	< 0.001	NDUFA6	2.18	0.008	RP5-1000K24.2	-1.9	0.047
S1 POSTc RPMI ST vs T0	AK6	1.95	0.028	TNFRSF11A	2.46	0.018	MAFF	4.32	< 0.001	LINC02267	-2.5	0.039
S1 POSTc RPMI ST vs T0	FCN1	-8.94	< 0.001	FBXO15	-3.66	< 0.001	TNFAIP2	-2.38	0.045	LINC02484	2.2	0.05
S1 POSTc RPMI ST vs T0	HACE1	-3.72	0.025	PMAIP1	2.59	0.002	ZNF445	-3.09	< 0.001	C8orf34-AS1	-2.74	0.008
S1 POSTc RPMI ST vs T0	PILRA	-4.09	0.008	TXNL4A	2.05	0.013	PGBD2	-2.31	0.032	C5orf17	-3.23	0.021
S1 POSTc RPMI ST vs T0	ATG16L1	-1.95	0.048	CACNA1A	-3.1	0.026	KIAA0825	-2.21	0.012	FMN1	-7.49	0.002
S1 POSTc RPMI ST vs T0	FOLH1	-6.81	0.012	TMEM91	-3.54	0.041	KLHL33	-3.72	< 0.001	HAUS5	-2.51	0.006
S1 POSTc RPMI ST vs T0	ZFAND6	1.77	0.038	SIK1	-7.22	0.003	OR2V1	-4.15	0.008	RP11-548H18.2	7.13	0.005
S1 POSTc RPMI ST vs T0	LAT2	1.94	0.028	TMEM50B	-1.82	0.049	METTL7A	-4.21	< 0.001	LINC00939	-3.14	0.003
S1 POSTc RPMI ST vs T0	HUWE1	2.19	0.007	GEMIN7	2.2	0.036	IFNLR1	3.23	0.015	LINC01088	-2.3	0.008
S1 POSTc RPMI ST vs T0	L2HGDH	-2.24	0.011	ADAMTS10	-3.8	0.02	LMLN	-3.54	0.041	RP11-317M11.1	-3.63	0.032
S1 POSTc RPMI ST vs T0	KLHL42	-4.27	0.006	MYO1F	-2.85	0.002	PSMD13	1.92	0.02	LINC01016	-2.7	0.021
S1 POSTc RPMI ST vs T0	CASS4	-3.03	0.005	NLRP12	-7.29	0.003	SHC4	-4.29	< 0.001	UGDH-AS1	-3.02	< 0.001
S1 POSTc RPMI ST vs T0	KIZ	-5.46	< 0.001	PSMB6	1.67	0.047	MYBL1	-3.88	0.015	NAIP	-4.01	< 0.001
S1 POSTc RPMI ST vs T0	SIRPG	-2.22	0.02	SIGLEC10	-2.07	0.028	ANKFY1	-2.83	0.013	SERBP1P5	2.2	0.05
S1 POSTc RPMI ST vs T0	SLC8B1	-2.02	0.04	NOSIP	-1.73	0.038	DNAH14	-4.21	0.007	RP4-539M6.19	2.83	0.029
S1 POSTc RPMI ST vs T0	DZANK1	-3.54	0.041	PLK4	-7.54	0.001	C16orf54	-3.92	< 0.001	LINC02503	-3.41	< 0.001
S1 POSTc RPMI ST vs T0	OAS1	-2.64	0.001	SYTL1	-4.37	< 0.001	NKAIN3	-2.9	< 0.001	LINC02465	-6.9	0.009
S1 POSTc RPMI ST vs T0	TRMT6	2.17	0.012	SERBP1	1.67	0.041	ZNF267	2.47	0.004	OR7E94P	-2.85	0.003
S1 POSTc RPMI ST vs T0	GRAMD1A	2.29	0.021	PRKACB	-4.74	< 0.001	TMLHE	-7.42	0.002	LINC02242	-2.61	0.043
S1 POSTc RPMI ST vs T0	ARHGAP4	-2.32	0.006	C1orf162	-4.69	< 0.001	RASA3	-4.16	< 0.001	RP11-60A8.1	-3.03	0.032
S1 POSTc RPMI ST vs T0	BLVRB	2.37	0.01	GPR161	-6.81	0.012	DLEU7	-2.41	0.009	RP11-346J10.1	-7.42	0.002
S1 POSTc RPMI ST vs T0	RGS1	2.95	< 0.001	XCL1	8.22	< 0.001	KRT73	-6.99	0.007	RP11-114H21.2	-4.09	0.008
S1 POSTc RPMI ST vs T0	ICAM1	4.27	< 0.001	XCL2	7.73	< 0.001	GSAP	-3.95	0.012	LINC02742	-3.35	0.004
S1 POSTc RPMI ST vs T0	LYZ	-11.28	< 0.001	NUF2	-7.42	0.002	WWOX	-2.87	0.002	MCPH1-AS1	-2.21	0.036
S1 POSTc RPMI ST vs T0	FLT3LG	-2.19	0.008	PFDN2	4.3	< 0.001	ZNF17	-3.63	0.032	RP11-484L7.2	-3.23	0.021
S1 POSTc RPMI ST vs T0	ZNF268	-3.79	0.001	USP21	-3.95	0.012	TMEM212	-1.99	0.025	RP11-381K20.2	-2.68	0.004
S1 POSTc RPMI ST vs T0	GLG1	-2.17	0.011	FCRL5	-4.77	< 0.001	ANKRD37	2.28	0.029	LINC02762	-8.07	< 0.001
S1 POSTc RPMI ST vs T0	PITPNM2	-3.54	0.041	RGS16	4.76	< 0.001	LINC00643	-2.73	0.036	EDIL3-DT	-2.88	0.006
S1 POSTc RPMI ST vs T0	NRCAM	-6.81	0.012	GABPB2	-1.99	0.038	CCDC30	-2.6	0.029	RP11-4O3.1	-3.52	0.003
S1 POSTc RPMI ST vs T0	CMTM6	2.09	0.012	SUSD4	-6.81	0.012	ZNF197	-7.42	0.002	LINC00989	-7.49	0.002
S1 POSTc RPMI ST vs T0	ITGA6	-2.41	0.008	TP53BP2	2.35	0.007	INSIG1	3.06	< 0.001	LINC02197	-8.36	< 0.001
S1 POSTc RPMI ST vs T0	TF	-2.99	0.001	ATP8B2	-2.2	0.013	ANKRD20A5P	-3.8	0.02	LINC01182	-7.49	0.002
S1 POSTc RPMI ST vs T0	NLRP1	-3	< 0.001	S100A8	-11.52	< 0.001	MYT1L	-5.04	< 0.001	RP11-153M7.3	-2.59	0.008
S1 POSTc RPMI ST vs T0	ORC6	-2.52	0.006	ITPKB	-2.32	0.007	SMIM29	1.85	0.029	RP11-46H11.3	-7.29	0.003
S1 POSTc RPMI ST vs T0	HECTD1	-2.27	0.017	PSEN2	-2.53	0.003	MIR22HG	2.24	0.026	ZBED3-AS1	-2.4	0.004
S1 POSTc RPMI ST vs T0	PHGDH	4.44	0.007	PDIA6	1.76	0.034	BCR	-2.32	0.022	GMDS-DT	-2.13	0.023
S1 POSTc RPMI ST vs T0	EZR	1.85	0.025	ATP6V1C2	2.52	0.024	ZSCAN30	-2.74	0.003	SNHG21	-4.83	< 0.001
S1 POSTc RPMI ST vs T0	RFFL	-2.33	0.008	WDPCP	-1.99	0.017	LILRB4	-8.15	< 0.001	AE000661.37	-2.43	0.005
S1 POSTc RPMI ST vs T0	UNC13D	-2.43	0.05	SNRPG	2	0.013	TNFRSF4	5.44	< 0.001	RP11-582J16.4	-2.74	0.002
S1 POSTc RPMI ST vs T0	ADA2	-10.91	< 0.001	MEIS1	-4.53	0.002	TRABD2A	-1.84	0.041	CTD-2035E11.3	-4.83	< 0.001
S1 POSTc RPMI ST vs T0	CREM	5.06	< 0.001	TMEM177	4.3	0.01	MAPT	4.05	0.02	RP11-37B2.1	-3.4	< 0.001
S1 POSTc RPMI ST vs T0	SRPK1	1.72	0.039	SLC20A1	-2.28	0.035	TNFRSF18	4.32	< 0.001	LINC02882	-4.83	< 0.001
S1 POSTc RPMI ST vs T0	BRPF3	-7.85	< 0.001	LIPT1	-3.54	0.041	LINC01551	-2.09	0.012	RP11-281P23.1	-2.73	0.003
S1 POSTc RPMI ST vs T0	EFHC1	-3.36	0.003	AFF3	-8.03	< 0.001	GPR141	-2.79	0.015	LINC02475	-7.42	0.002
S1 POSTc RPMI ST vs T0	HSP90AB1	2.57	0.002	SCN1A	-3.7	0.004	CYP4A11	-3.72	0.025	AP000350.10	1.87	0.035
S1 POSTc RPMI ST vs T0	IL12RB1	-3.17	0.003	HSPD1	2.67	0.001	PLCD1	-5.05	< 0.001	LINC00499	-2.37	0.018
S1 POSTc RPMI ST vs T0	PCSK5	-6.35	< 0.001	UNC80	-2.21	0.027	SHTN1	-6.81	0.012	RP11-484O2.1	-3.52	0.003
S1 POSTc RPMI ST vs T0	NRP1	-4.67	0.001	SPAG16	-4.43	0.003	MAGI2	-2.21	0.036	IGKV1D-39	-4.05	< 0.001
S1 POSTc RPMI ST vs T0	MACROH2A2	-2.95	0.039	GMPPA	-4.98	< 0.001	ZNF286A	-2.08	0.029	LINC02482	-4.48	0.003
S1 POSTc RPMI ST vs T0	MARCHF2	-3.8	0.02	DYNC1LI1	1.91	0.027	RGPD1	-1.89	0.041	FAM153B	-3.63	0.032
S1 POSTc RPMI ST vs T0	CDC34	7.21	0.004	RBMS3	-4.95	< 0.001	DHRS4L2	-3.8	0.02	LINC02241	-3.35	0.005
S1 POSTc RPMI ST vs T0	GADD45B	2.18	0.011	COL8A1	-2.78	0.012	TRPV2	-3.6	0.002	LINC02754	-2.5	0.039
S1 POSTc RPMI ST vs T0	LZTR1	-1.8	0.048	NXPE3	-2.69	0.006	EIF4EBP1	2.77	0.005	RNY4	-4.13	0.001
S1 POSTc RPMI ST vs T0	CECR2	-6.81	0.012	TAGLN3	7.13	0.005	OR6C75	-4.92	< 0.001	LINC01609	-3.19	< 0.001
S1 POSTc RPMI ST vs T0	SNRPD3	1.72	0.046	LPP	-2.35	0.004	RP11-43F13.1	-7.49	0.002	LINC00967	-3.54	0.041
S1 POSTc RPMI ST vs T0	CRYBB2P1	-2.36	0.01	MANF	2.69	0.003	MORN2	3.86	0.032	MAILR	-2.22	0.042
S1 POSTc RPMI ST vs T0	LGALS2	-7.22	0.003	SCD5	-3.61	0.006	ARL4C	-2.8	< 0.001	RAD21-AS1	-2.42	0.04
S1 POSTc RPMI ST vs T0	PIK3IP1	-1.68	0.048	PLAC8	-2.06	0.015	AGRN	4.48	< 0.001	TUG1	-2.1	0.014
S1 POSTc RPMI ST vs T0	PATZ1	-3.72	0.025	TBCK	-3.07	0.007	FAM166A	7.13	0.005	RP11-566H8.3	-8.73	< 0.001
S1 POSTc RPMI ST vs T0	SNU13	1.87	0.021	CISD2	1.88	0.036	ZNF793	-2.64	0.03	PCAT1	-7.42	0.002
S1 POSTc RPMI ST vs T0	TPTEP1	-5	< 0.001	ANK2	-3.6	0.002	TUBB4B	2.61	0.002	RP11-473J6.1	-3.13	0.002
S1 POSTc RPMI ST vs T0	PPP6R2	-4.27	0.006	MARCHF1	-4.48	0.003	CIBAR1	-3.72	0.025	CTA-398F10.1	-4.24	< 0.001
S1 POSTc RPMI ST vs T0	APOL4	-2.21	0.027	SRD5A1	-2.9	< 0.001	H3-5	2.64	0.046	PCDHGA6	-2.11	0.016
S1 POSTc RPMI ST vs T0	APOL1	2.67	0.003	SKP2	-2.7	0.002	SELL	-3.67	< 0.001	IGLV1-41	-4.33	0.005
S1 POSTc RPMI ST vs T0	GRAP2	-2.51	0.017	PIK3R1	-2.95	< 0.001	CERKL	-2.85	0.025	KB-173C10.2	4.14	0.015
S1 POSTc RPMI ST vs T0	IFT27	-3.2	0.008	SSBP2	-2.03	0.034	HBA2	-2.95	0.01	LINC01608	-2.18	0.008
S1 POSTc RPMI ST vs T0	NCF4	-7.65	< 0.001	PPIP5K2	-1.8	0.031	OR2G6	-1.85	0.041	RP11-61L23.2	2.94	< 0.001
S1 POSTc RPMI ST vs T0	IL2RB	1.94	0.039	FBXL17	-7.22	0.003	RALGAPA2	-4.27	0.006	PINX1	1.94	0.039
S1 POSTc RPMI ST vs T0	BRD1	-4.79	< 0.001	TNFAIP8	1.71	0.038	CFAP54	-2.21	0.008	RP11-17A4.2	-3.21	< 0.001
S1 POSTc RPMI ST vs T0	GZMB	6.07	< 0.001	ARHGAP26	-2.62	0.002	DPYD	-3.81	0.001	LINC02732	-2.74	0.003
S1 POSTc RPMI ST vs T0	COCH	-4.15	0.008	IL9	9.63	< 0.001	UROS	-4.51	< 0.001	CTD-2210P24.1	-3.54	0.041
S1 POSTc RPMI ST vs T0	AP4S1	-2.38	0.033	PCYOX1L	-6.99	0.007	FAM221A	-2.35	0.014	AP000662.4	-4.27	0.006
S1 POSTc RPMI ST vs T0	DDHD1	-1.78	0.035	TNIP1	2.33	0.004	FSIP2	-3.17	< 0.001	LINC02682	-7.36	0.002
S1 POSTc RPMI ST vs T0	PSMA3	1.8	0.03	NHP2	2.13	0.012	ZNF548	-2.31	0.032	IGLL5	-2.89	< 0.001
S1 POSTc RPMI ST vs T0	GSTZ1	-6.9	0.009	GFOD1	2.96	0.004	LRRK2	-2.79	0.031	CTD-2184C24.2	-8.45	< 0.001
S1 POSTc RPMI ST vs T0	KIAA0586	-2.8	0.002	KLHL3	-4.87	< 0.001	UTS2B	-3.4	0.012	OR10G4	-2.18	0.021
S1 POSTc RPMI ST vs T0	AHSA1	2.55	0.002	NFKBIE	4.05	0.02	RELN	-8.03	< 0.001	MPV17L2	4.14	0.015
S1 POSTc RPMI ST vs T0	HIF1A	2.05	0.013	IRAK1BP1	-2.01	0.04	FAM111B	-2.55	0.004	STX16-NPEPL1	-3.21	0.004
S1 POSTc RPMI ST vs T0	ZC3H14	2.62	0.007	MMS22L	-2.52	0.038	ZNF33A	-2.13	0.018	LINC02324	-1.99	0.022
S1 POSTc RPMI ST vs T0	VRK1	-1.86	0.026	PNRC1	-2.1	0.015	AC069277.2	-2.87	0.012	STX17-AS1	-2.51	0.004
S1 POSTc RPMI ST vs T0	PSMB5	2.1	0.02	SCML4	-3.16	< 0.001	FHIT	-5.32	< 0.001	MIR100HG	-2.45	0.006
S1 POSTc RPMI ST vs T0	PSMA6	1.96	0.015	TBC1D32	-3.1	0.011	ZKSCAN3	-3.13	< 0.001	LINC02548	-3.75	0.004
S1 POSTc RPMI ST vs T0	PSME2	1.66	0.042	SLC18B1	-7.29	0.003	SLC35E2B	-2.04	0.025	PRECSIT	-3.56	0.007
S1 POSTc RPMI ST vs T0	CD40	1.87	0.047	ATXN7L1	-3.37	< 0.001	USP32P3	-2.89	< 0.001	CCND2-AS1	-3.72	0.025
S1 POSTc RPMI ST vs T0	IFT52	-3.61	0.006	SLC12A9	-1.96	0.046	SPAG16-DT	-3.1	0.011	RP11-575F12.2	-3.43	0.004
S1 POSTc RPMI ST vs T0	NDRG3	-1.87	0.046	LANCL3	-4.27	0.006	CCDC189	-6.99	0.007	CTSO	-2.49	0.009
S1 POSTc RPMI ST vs T0	PFDN4	1.88	0.025	ZNF182	-2.44	0.046	ZNF250	2.5	0.013	COA8	2	0.023
S1 POSTc RPMI ST vs T0	SLCO4A1	5.13	< 0.001	OGT	-1.9	0.03	ZNF79	-6.81	0.012	LINC00507	-3.52	< 0.001
S1 POSTc RPMI ST vs T0	CDC25B	-2.97	0.004	GCNA	2.91	0.043	S100A4	-3.45	< 0.001	RP11-1038A11.2	-2.38	0.045
S1 POSTc RPMI ST vs T0	TRIB3	2.7	0.012	MFHAS1	2.18	0.018	PLEKHG4	-7.07	0.005	LINC02552	-3.54	0.041
S1 POSTc RPMI ST vs T0	SAMHD1	-3.35	< 0.001	FBXO25	-2.98	0.007	COLCA1	-2.54	0.004	RP11-111K18.1	2.3	0.005
S1 POSTc RPMI ST vs T0	KIF3B	2.07	0.048	CSGALNACT1	-4.09	< 0.001	STK40	1.86	0.032	PARP11-AS1	-7.65	< 0.001
S1 POSTc RPMI ST vs T0	CST3	-9.7	< 0.001	ATP6V1B2	3	< 0.001	TMEM63A	-2.7	0.005	RP11-266O8.1	-3.88	0.015
S1 POSTc RPMI ST vs T0	EPPIN	-3.54	0.041	BIN3	-2.73	0.036	SEMA4A	2.96	0.004	ODC1-DT	-2.19	0.014
S1 POSTc RPMI ST vs T0	DHX35	-7.94	< 0.001	ADHFE1	-10.43	< 0.001	TUBB	2.36	0.004	RP11-1143G9.4	-6.72	< 0.001
S1 POSTc RPMI ST vs T0	CELF4	-6.9	0.009	POLR2K	3.49	< 0.001	OR2C3	-6.9	0.009	RP1-78O14.1	-2.07	0.025
S1 POSTc RPMI ST vs T0	USP14	2.31	0.012	PLIN2	1.91	0.027	ZNF107	-2.02	0.032	RP11-210M15.1	-3.03	0.032
S1 POSTc RPMI ST vs T0	NOL4	-7.6	0.001	CEP78	-2.42	0.019	ZNF471	-4.26	< 0.001	RP11-588H23.3	-2.6	0.029
S1 POSTc RPMI ST vs T0	RBBP8	4.04	0.003	AUH	2.2	0.05	ZNF836	-3.35	0.014	LINC00485	-5.07	< 0.001
S1 POSTc RPMI ST vs T0	VSIG1	-4.67	0.001	AOPEP	-3.88	0.015	ZNF493	-2.39	0.007	RP11-161H23.5	3.18	< 0.001
S1 POSTc RPMI ST vs T0	STS	-2.48	0.009	GSN	-3.03	0.032	SUPT3H	-2.55	0.006	RP11-111A21.1	-2.17	0.022
S1 POSTc RPMI ST vs T0	ATP11C	-4.71	0.001	ASTN2	-2.29	0.013	GARS1-DT	-2.32	0.007	RHOXF1-AS1	-2.5	0.039
S1 POSTc RPMI ST vs T0	MCF2	-7.07	0.005	SURF4	2.13	0.012	MFSD14C	-2.76	0.002	RP11-72M17.1	-4.09	0.008
S1 POSTc RPMI ST vs T0	EMD	2.42	0.007	NOTCH1	3.28	0.013	LONP1	1.77	0.049	CTD-2298J14.2	-2.89	0.013
S1 POSTc RPMI ST vs T0	PGK1	2.65	0.001	NRBF2	2.13	0.035	ZNF781	-2.95	0.039	LINC02328	-3.31	0.005
S1 POSTc RPMI ST vs T0	KLF8	-2.72	0.014	RGR	-5.73	< 0.001	EVL	-1.75	0.037	LINC02301	-4.55	< 0.001
S1 POSTc RPMI ST vs T0	GLA	2.19	0.012	ADD3	-3.69	< 0.001	ZNF124	-3.56	0.007	RP11-80A15.1	-6.9	0.009
S1 POSTc RPMI ST vs T0	NDFIP2	4.29	< 0.001	GSTO1	1.83	0.033	ARMCX4	-3.23	0.021	RP11-561B11.2	1.95	0.024
S1 POSTc RPMI ST vs T0	TNFSF13B	-4.02	0.01	PTPRJ	-2.07	0.018	ZNF605	-3.54	0.041	CTD-2547L24.3	3.11	0.021
S1 POSTc RPMI ST vs T0	UGGT2	-3.19	0.008	INTS4	-2.51	0.017	SULT1A1	-2.66	0.018	RP11-47I22.4	-3.16	0.021
S1 POSTc RPMI ST vs T0	FLT1	3.99	0.004	TTC12	-4.09	0.008	ANAPC7	-2.34	0.045	FPGT-TNNI3K	-6.9	0.009
S1 POSTc RPMI ST vs T0	DHRS12	-4.27	0.006	ATM	-1.98	0.016	TPK1	-4.71	0.001	PTCSC3	-7.07	0.005
S1 POSTc RPMI ST vs T0	TSC22D1	-3.03	0.008	HYOU1	2.59	0.003	SULF2	-4.33	0.005	RP11-624L4.1	-2.8	0.002
S1 POSTc RPMI ST vs T0	CLN5	-2.33	0.005	TMEM25	-4.27	0.006	XRCC2	-2.02	0.022	RP11-1069G10.1	-3.61	0.006
S1 POSTc RPMI ST vs T0	PHKB	-2.18	0.019	TAGLN	-2.8	0.007	ZNF846	-7.36	0.002	RP11-346D14.1	-3.29	< 0.001
S1 POSTc RPMI ST vs T0	CCL22	7.45	0.002	TM7SF2	-2.95	0.039	TCF4	-3.07	0.005	LINC02254	-1.98	0.02
S1 POSTc RPMI ST vs T0	PARD6A	7.37	0.003	ALDOA	2.23	0.006	TOMM7	-1.69	0.039	NR4A1AS	4.05	0.02
S1 POSTc RPMI ST vs T0	VAC14	-3.72	0.025	CNKSR2	-3.38	0.002	TRPV1	-4.98	< 0.001	PWRN1	-4.43	0.003
S1 POSTc RPMI ST vs T0	COG4	-2.9	0.002	KLRF1	-3.63	0.032	NF1	-2.68	0.008	RP11-553L6.5	-2.53	0.028
S1 POSTc RPMI ST vs T0	SLC7A6	-2.29	0.014	MPP7	-9.45	< 0.001	DAPK1	-7.49	0.002	RP11-521O16.2	-3.46	0.01
S1 POSTc RPMI ST vs T0	COTL1	-2.03	0.022	ARID5B	1.97	0.015	CD47	1.81	0.028	RP11-24M17.4	-2.43	0.05
S1 POSTc RPMI ST vs T0	LMF1	-6.9	0.009	KIAA1328	-3.46	< 0.001	MAML3	4.37	0.008	RP11-631M21.1	-6.9	0.009
S1 POSTc RPMI ST vs T0	CIAO3	-2.71	0.023	DLG2	-3.72	0.025	ARID5A	2.79	0.002	AQP4-AS1	-7.49	0.002
S1 POSTc RPMI ST vs T0	SLC7A5	5.96	< 0.001	NOCT	3.68	< 0.001	KPNA5	-2.76	< 0.001	RP11-410C4.5	-8.75	< 0.001
S1 POSTc RPMI ST vs T0	MEFV	-2.95	0.039	CACNA1C	-6.9	0.009	PDLIM7	7.37	0.003	FAM157C	-2.49	0.032
S1 POSTc RPMI ST vs T0	CLUAP1	-3.36	0.002	C12orf45	-2.58	0.002	SCOC-AS1	-4.27	0.006	HERC2P5	-4.15	< 0.001
S1 POSTc RPMI ST vs T0	RBL2	-1.78	0.033	ANK3	-2.07	0.037	FUT11	2.17	0.041	LINC01541	-3.88	0.015
S1 POSTc RPMI ST vs T0	BCKDK	5.54	< 0.001	EIF4E	2.59	0.004	ZNF138	-1.9	0.038	RP11-311C24.1	3.46	0.021
S1 POSTc RPMI ST vs T0	LACTB	2.78	0.013	TEX30	2.12	0.041	SERTAD1	3.25	0.002	LINC02193	-3.36	0.002
S1 POSTc RPMI ST vs T0	TTC23	-6.99	0.007	MIPOL1	-3.12	< 0.001	ZMYM1	-7.65	< 0.001	RP11-552M11.8	-2.42	0.019
S1 POSTc RPMI ST vs T0	FAH	4.16	< 0.001	NUBPL	-3.1	0.026	MAFG	3.05	0.001	RP11-174G6.5	-2.53	0.012
S1 POSTc RPMI ST vs T0	GABPB1	3.5	< 0.001	FER	-2.15	0.016	GAL3ST4	-7.54	0.001	PECAM1	-2.88	0.048
S1 POSTc RPMI ST vs T0	DMXL2	-3.95	0.012	ACAD8	-2.44	0.046	RP11-573D15.8	-4.53	0.002	BBS7-DT	-3.9	< 0.001
S1 POSTc RPMI ST vs T0	BLOC1S6	-1.8	0.03	TEX9	-3.46	0.01	PGAP1	5.05	< 0.001	CTB-31O20.2	-3.75	0.004
S1 POSTc RPMI ST vs T0	SGK3	-5.43	< 0.001	ADAM8	2.41	0.008	SRC	4.22	0.012	HERC2P8	-3.97	< 0.001
S1 POSTc RPMI ST vs T0	LAPTM4B	3.72	< 0.001	ANKAR	-4.37	< 0.001	ZNF772	-3.54	0.041	LINC02605	-3.28	0.002
S1 POSTc RPMI ST vs T0	GDAP1	-3.28	< 0.001	AMN1	-3.46	0.01	ZNF257	-3.29	0.017	RP11-96K19.4	-3.3	< 0.001
S1 POSTc RPMI ST vs T0	NDRG1	4.37	< 0.001	CCDC122	-2.5	0.004	ADAM32	-2.88	< 0.001	LINC00662	-3.27	< 0.001
S1 POSTc RPMI ST vs T0	TRPS1	-3.29	0.017	CENPJ	-6.81	0.012	SERPINA1	-3.19	< 0.001	RP11-691G17.1	-3.29	< 0.001
S1 POSTc RPMI ST vs T0	SPAG1	7.21	0.004	PARP8	-2.71	0.001	BNIP3P1	4.43	< 0.001	RP11-160E2.6	2.91	0.003
S1 POSTc RPMI ST vs T0	SNX16	-7.07	0.005	DST	-4.91	< 0.001	ADARB1	-4.77	< 0.001	LINC00621	-2.52	0.007
S1 POSTc RPMI ST vs T0	INTS10	-3.06	0.007	KCNE4	-2.59	0.011	PDGFA	5.57	< 0.001	RP11-156P1.3	-1.96	0.033
S1 POSTc RPMI ST vs T0	LEPROTL1	-1.85	0.025	RABGAP1L	-2.23	0.009	RPF2	2.03	0.018	ZNF213-AS1	-5.94	< 0.001
S1 POSTc RPMI ST vs T0	KLHDC4	-2.23	0.016	SPC25	-8.03	< 0.001	OR6Y1	-3.09	0.001	NBPF11	-2.77	0.003
S1 POSTc RPMI ST vs T0	ASAH1	-1.73	0.046	PDE3B	-2.15	0.027	GZMM	-2.14	0.041	ZNF407-AS1	-2.59	0.006
S1 POSTc RPMI ST vs T0	BNIP3L	2.27	0.007	ZFP36L2	-2.77	< 0.001	PIGN	-3.72	< 0.001	L3MBTL4-AS1	-2.74	0.008
S1 POSTc RPMI ST vs T0	KCNN4	2.8	0.004	BANK1	-3.72	0.025	CCDC154	-6.9	0.009	TTC39C-AS1	-3.03	0.032
S1 POSTc RPMI ST vs T0	MAP4K1	-1.89	0.034	TXNDC11	-4.48	0.003	CPLANE1	-3.28	0.002	RP11-186B7.4	1.83	0.03
S1 POSTc RPMI ST vs T0	FCGRT	-2.99	0.009	SCOC	1.74	0.043	SERPINB2	8.98	< 0.001	TWSG1-DT	-3.33	< 0.001
S1 POSTc RPMI ST vs T0	ARHGEF18	-4.54	< 0.001	RBMS1	-1.91	0.024	LHFPL5	-2.37	0.026	RP11-728E14.3	-3.35	0.004
S1 POSTc RPMI ST vs T0	DOT1L	2.11	0.019	SCN3A	-6.99	0.007	EME2	-2.7	0.004	TSPOAP1-AS1	-7.85	< 0.001
S1 POSTc RPMI ST vs T0	OAZ1	1.78	0.029	TRAPPC8	-7.29	0.003	KLHDC1	-4.02	0.01	RP11-192H23.5	3.94	0.004
S1 POSTc RPMI ST vs T0	IL4I1	7.21	0.004	UBALD1	7.29	0.003	OCLN	-6.99	0.007	RBM8A	1.8	0.029
S1 POSTc RPMI ST vs T0	TLE5	-1.85	0.03	CEBPG	3.33	< 0.001	MDS2	-8.18	< 0.001	RP11-21J18.1	3.25	< 0.001
S1 POSTc RPMI ST vs T0	KIR3DX1	-5.43	< 0.001	MCOLN2	2.97	0.005	NKIRAS1	3.11	0.021	LINC01892	-4.15	0.008
S1 POSTc RPMI ST vs T0	LILRB1	-7.42	0.002	ZUP1	7.77	< 0.001	CYYR1-AS1	-3.26	0.006	TXNIP	-5.39	< 0.001
S1 POSTc RPMI ST vs T0	RASAL3	-1.9	0.048	GRAP	-7.76	< 0.001	MPZL1	2.41	0.022	RN7SL371P	-6.9	0.009
S1 POSTc RPMI ST vs T0	GPI	2.34	0.004	SLC5A10	-4.79	< 0.001	ZNF273	-2.79	0.031	NBPF15	-2.14	0.014
S1 POSTc RPMI ST vs T0	EBI3	4.37	0.008	AK5	-6.99	0.007	ADH4	-2.37	0.01	RP11-242D8.1	-2.22	0.01
S1 POSTc RPMI ST vs T0	SLC1A5	4.17	< 0.001	RETREG1	-2.72	0.003	ZNF248	-2.95	0.018	UXT-AS1	-2.88	0.048
S1 POSTc RPMI ST vs T0	TJP3	-3.63	0.032	LRRK1	-2.02	0.018	SZT2	-2.02	0.016	ILF3-DT	-2.69	0.016
S1 POSTc RPMI ST vs T0	BBC3	4.63	0.003	ABCA9	-2.68	0.004	CSF2RA	-7.22	0.003	SCAT1	-2.02	0.038
S1 POSTc RPMI ST vs T0	DENND3	3.29	0.002	OBSCN	-7.54	0.001	SLC29A3	-7.85	< 0.001	GEMIN7-AS1	2.17	0.045
S1 POSTc RPMI ST vs T0	CDC37	1.78	0.036	GBP5	2.26	0.007	TMEM116	-3.78	0.001	RP11-47L3.1	-1.97	0.032
S1 POSTc RPMI ST vs T0	CAPS	-3.05	0.013	DIPK1A	-4.21	0.007	UCKL1	3.66	0.01	TAF5LP1	-7.22	0.003
S1 POSTc RPMI ST vs T0	CRTC1	-7.07	0.005	CNTNAP3B	-2.38	0.033	PHETA1	-6.81	0.012	CTC-260E6.6	-2.37	0.026
S1 POSTc RPMI ST vs T0	DDX49	-1.93	0.038	ELOC	1.62	0.05	PIM3	2.81	< 0.001	LINC02073	-1.69	0.044
S1 POSTc RPMI ST vs T0	PBX4	-3.54	0.041	PSMA8	-6.81	0.012	OGA	-1.93	0.027	CTC-425F1.4	2.39	0.039
S1 POSTc RPMI ST vs T0	ATP13A1	-5.35	< 0.001	BTG3	2.07	0.027	TPM2	-7.76	< 0.001	S1PR2	2.61	0.018
S1 POSTc RPMI ST vs T0	ETHE1	2.19	0.024	C21orf91	2.13	0.042	ATL1	-3.75	0.004	AC104532.4	-2.5	0.022
S1 POSTc RPMI ST vs T0	RUNDC3B	-4.21	0.007	TSEN2	-2.93	0.005	ZNF43	-2.34	0.013	CTC-459F4.3	-3.04	0.007
S1 POSTc RPMI ST vs T0	TFPI2	7.37	0.003	SLFN13	-4.21	0.007	CTNND1	-3.8	0.02	RUNDC3A-AS1	-3.54	0.041
S1 POSTc RPMI ST vs T0	NAMPT	3.07	< 0.001	OXNAD1	-2.95	< 0.001	RD3	-4.38	0.004	LIN37	4.14	0.015
S1 POSTc RPMI ST vs T0	DUS4L	-3.63	0.032	PLCL2	-2.53	0.02	CCDC69	-2	0.035	NDUFV2P1	2.75	0.005
S1 POSTc RPMI ST vs T0	ATP6V0A4	3.17	0.018	CCDC144B	-2.24	0.008	MDM4	-2.04	0.012	AC006129.2	-2.17	0.018
S1 POSTc RPMI ST vs T0	ADAP1	4.22	0.012	MPPE1	-1.98	0.041	TTC37	-2.45	0.011	NBPF12	-1.9	0.037
S1 POSTc RPMI ST vs T0	LMBR1	-6.99	0.007	USP25	-2.26	0.033	SLC9A6	-3.05	0.013	CTD-2017D11.1	-2.9	0.002
S1 POSTc RPMI ST vs T0	HIBADH	-2.79	0.015	SLC16A1	1.79	0.044	FAN1	-2.17	0.023	IGFL2-AS1	-4.02	0.01
S1 POSTc RPMI ST vs T0	CPVL	-9.32	< 0.001	NIFK	2.12	0.015	MT-ND6	-1.89	0.022	LINC00664	-7.22	0.003
S1 POSTc RPMI ST vs T0	CHCHD2	1.65	0.049	SLC7A7	-3.88	0.015	F5	-4.38	0.004	CTC-523E23.5	-2.53	0.028
S1 POSTc RPMI ST vs T0	CYP3A5	-2.28	0.016	MIER3	2.24	0.021	ZNF652	-2.17	0.015	ZNF350-AS1	-4.21	0.007
S1 POSTc RPMI ST vs T0	TMEM106B	-1.97	0.018	PIK3AP1	3.72	0.008	RCSD1	-2.47	0.005	AC005614.3	-3.19	< 0.001
S1 POSTc RPMI ST vs T0	GIMAP2	-2.09	0.027	FLACC1	4.14	0.015	FAM169A	-7.22	0.003	ZNF132-DT	-2.39	0.013
S1 POSTc RPMI ST vs T0	TMEM176B	-9.16	< 0.001	PXYLP1	-4.09	0.008	MT-ND5	-1.84	0.025	RP11-370I10.12	-3.72	< 0.001
S1 POSTc RPMI ST vs T0	PSMA2	2.11	0.009	CARNMT1	-4.67	0.001	PNP	2.44	0.004	TMEM185A	7.21	0.004
S1 POSTc RPMI ST vs T0	TMEM248	-3.1	0.026	BATF	2.57	0.007	GK	7.61	< 0.001	C10orf95-AS1	-2.8	0.002
S1 POSTc RPMI ST vs T0	TBL2	5.25	< 0.001	ADAMTSL3	-3.35	< 0.001	UBE2J1	-2.73	0.036	RP11-13J10.1	-2.85	0.001
S1 POSTc RPMI ST vs T0	NMRK1	-2.13	0.023	CXCL13	7.37	0.003	RYR3	-4.15	0.008	NBPF9	-2.17	0.011
S1 POSTc RPMI ST vs T0	CDC37L1	2.12	0.031	RWDD2B	-4.21	0.007	PNMA5	-6.9	0.009	ZIM2-AS1	-2.95	0.01
S1 POSTc RPMI ST vs T0	RIC1	-3.23	0.021	CCT8	1.84	0.026	ITPRIPL1	3.46	0.021	KCNQ1OT1	-3.05	< 0.001
S1 POSTc RPMI ST vs T0	KDM4C	-1.83	0.042	PPP2R2B	-5.18	< 0.001	DZIP3	-5.18	< 0.001	SPACA6P-AS	-3.88	0.015
S1 POSTc RPMI ST vs T0	MPDZ	-7.22	0.003	TYSND1	-7.15	0.004	DMD	-2.34	0.013	ATP6V0D1-DT	-3.88	0.015
S1 POSTc RPMI ST vs T0	NPDC1	-4.1	< 0.001	PHF6	2.71	0.006	KIFBP	7.13	0.005	RP11-157E16.1	-2.61	0.01
S1 POSTc RPMI ST vs T0	ABCA2	-7.94	< 0.001	KAT6B	-2.99	0.001	Y_RNA	-3.63	0.032	NBPF8	-1.95	0.028
S1 POSTc RPMI ST vs T0	PLEKHA1	-2.31	0.007	FBXO32	-3.51	0.008	INF2	-2.28	0.035	SMC2-DT	-2.22	0.022
S1 POSTc RPMI ST vs T0	VSIR	-2.37	0.012	FRRS1	-3.63	0.032	RP11-84A19.2	-2.4	0.017	RP11-331G2.6	-1.79	0.041
S1 POSTc RPMI ST vs T0	BMPR1A	-1.81	0.038	VPS8	-2.81	0.011	LINC01285	-2.01	0.045	IGHV1OR15-1	-3.76	0.001
S1 POSTc RPMI ST vs T0	ACTA2	-3.14	0.01	SEC13	1.79	0.033	OR2L2	-2.24	0.011	IGHV3-30	-3.2	< 0.001
S1 POSTc RPMI ST vs T0	TWNK	2.21	0.037	NRG1	-6.81	0.012	TCP10L3	-4.58	0.002	H4C14	-3.1	0.026
S1 POSTc RPMI ST vs T0	FBXW4	-2.66	0.009	LRP8	2.13	0.035	CR1	-8.65	< 0.001	MAP2K5-DT	-3.54	0.041
S1 POSTc RPMI ST vs T0	CPEB3	-6.9	0.009	SSBP3	-1.9	0.037	C6orf99	-7.29	0.003	TLCD4-RWDD3	-3.54	0.041
S1 POSTc RPMI ST vs T0	GTPBP4	2.2	0.012	GATAD1	-2.95	0.005	FCGR3A	-5.32	< 0.001	CTC-523E23.11	-3.74	< 0.001
S1 POSTc RPMI ST vs T0	PITRM1	2.31	0.006	FCSK	-4.27	0.006	PCMTD2	-2.45	0.017	CCNY-AS1	-2.44	0.046
S1 POSTc RPMI ST vs T0	STN1	-2.14	0.035	TSC22D3	-3.93	< 0.001	LIME1	-8.48	< 0.001	LINC01215	2.28	0.019
S1 POSTc RPMI ST vs T0	MAP3K8	2.5	0.012	KCNJ15	-3.05	< 0.001	LINC00632	-2.92	0.002	DCTN6-DT	-4.97	< 0.001
S1 POSTc RPMI ST vs T0	GLRX3	1.85	0.034	TSPAN18	-7.65	< 0.001	RTL8A	3.1	0.004	TAGAP-AS1	-2.57	0.003
S1 POSTc RPMI ST vs T0	CCNY	-2.13	0.023	WIPI2	-2.97	0.002	NHSL2	-3.95	0.012	RP11-415F23.2	-3.4	0.002
S1 POSTc RPMI ST vs T0	ENO3	-7.36	0.002	LDLRAP1	-3.49	0.001	TMEM273	1.86	0.046	RP1-313I6.12	-3.88	0.015
S1 POSTc RPMI ST vs T0	PSMD11	1.74	0.041	AGAP1	-4.48	0.003	SPIN3	-2.74	0.006	RP11-423P10.2	-2.87	0.005
S1 POSTc RPMI ST vs T0	YWHAE	2	0.014	PAFAH2	-4.09	0.008	PBX2	-7.36	0.002	CASC15	-2.37	0.009
S1 POSTc RPMI ST vs T0	MAP2K6	-7.15	0.004	MRPL17	2.19	0.025	AGER	-8.07	< 0.001	IER3-AS1	3.67	0.004
S1 POSTc RPMI ST vs T0	ALDOC	3.48	< 0.001	DUSP2	1.75	0.033	LAYN	8.55	< 0.001	ILRUN-AS1	-4.38	0.004
S1 POSTc RPMI ST vs T0	RAB34	-4.02	0.01	CUL4B	-2.63	0.002	HSPA1B	3.58	0.005	XXbac-BPGBPG55C20.2	-3.63	0.032
S1 POSTc RPMI ST vs T0	NFKB1	2.2	0.008	AUTS2	-2.74	0.018	HSPA1A	3.16	0.003	LINC01145	-2.61	0.043
S1 POSTc RPMI ST vs T0	MANBA	-2.18	0.019	MITD1	1.67	0.048	VARS1	7.03	0.007	XXbac-BPG299F13.17	-3.31	0.005
S1 POSTc RPMI ST vs T0	MAPK10	-2.81	< 0.001	EIF5B	1.64	0.048	MBD5	-3.65	0.002	RP11-415F23.4	-6.81	0.012
S1 POSTc RPMI ST vs T0	IL2	6.71	< 0.001	NCF1	-3.38	0.004	LST1	-2.73	0.002	GTF2IP13	-2.67	0.043
S1 POSTc RPMI ST vs T0	GRPEL1	2.44	0.005	CPA5	-2.49	0.011	C6orf136	2.7	0.005	LINC02018	-3.06	0.007
S1 POSTc RPMI ST vs T0	GAR1	2.26	0.02	ZFAND2B	-4.83	< 0.001	LILRB3	-2.88	0.048	CHASERR	-2.03	0.015
S1 POSTc RPMI ST vs T0	BST1	-3.88	0.015	GDPD5	-3.99	0.002	HLA-J	2.07	0.019	RP11-517H2.6	-2.68	0.026
S1 POSTc RPMI ST vs T0	SNX25	-3.72	0.025	RNF166	-8.36	< 0.001	OR11A1	-4.42	< 0.001	DGCR5	-3.8	0.02
S1 POSTc RPMI ST vs T0	MS4A6A	-9.49	< 0.001	DEDD	2.78	0.002	OR14J1	-2.81	0.001	RP4-583P15.15	-2.55	0.034
S1 POSTc RPMI ST vs T0	CCDC86	2.21	0.035	DMTN	-7.49	0.002	TCTN1	-5.12	< 0.001	SFTPD-AS1	-3.8	0.02
S1 POSTc RPMI ST vs T0	FBXO3	-3.52	0.003	ADAMTS4	-2.4	0.017	FAM201A	-6.81	0.012	RP11-383I23.2	-3.61	0.006
S1 POSTc RPMI ST vs T0	CD69	2.63	0.001	ATP5MC1	1.78	0.032	PCDHA4	-2.17	0.015	RP11-166O4.6	-1.82	0.038
S1 POSTc RPMI ST vs T0	CAPRIN2	-4.79	< 0.001	ARHGAP27	-2.9	0.021	PSENEN	2.17	0.011	APP-DT	-3.54	0.041
S1 POSTc RPMI ST vs T0	BIN2	-2.96	< 0.001	HK2	3.85	< 0.001	REXO1L1P	-6.99	0.007	RP11-50D16.4	-3.27	< 0.001
S1 POSTc RPMI ST vs T0	IL23A	4.45	< 0.001	THEM4	-2.88	0.002	PDE7A	-2.13	0.03	EPOP	7.29	0.003
S1 POSTc RPMI ST vs T0	BCL7A	2.98	0.036	RGL4	-1.86	0.043	HTN3	-4.21	0.007	CYFIP1	2.39	0.017
S1 POSTc RPMI ST vs T0	MAGOHB	2.22	0.013	RSPRY1	-2.05	0.022	CRYZL1	-1.88	0.049	RN7SL2	-2.88	0.006
S1 POSTc RPMI ST vs T0	GPN3	3.56	< 0.001	ADGRG5	-3.8	0.02	CEMP1	-7.22	0.003	CTD-2302E22.6	-3.23	0.004
S1 POSTc RPMI ST vs T0	CDKN1B	-1.87	0.038	TCAF2P1	2.63	0.012	C21orf62-AS1	-3.03	0.032	LINC01138	-3.14	< 0.001
S1 POSTc RPMI ST vs T0	GSG1	-3.05	0.013	ZNF362	-3.72	0.025	FAM230H	-3.51	0.002	FAM230J	-3.7	0.004
S1 POSTc RPMI ST vs T0	VDR	8.48	< 0.001	ABCG1	-7.54	0.001	GYG2P1	-3.35	0.005	CH17-189H20.1	-2.12	0.014
S1 POSTc RPMI ST vs T0	IFNG	8.53	< 0.001	TMPRSS3	2.82	0.007	HBA1	-4.06	0.001	RP11-326N17.2	-2.78	0.003
S1 POSTc RPMI ST vs T0	MDM1	-4.38	0.004	GAB3	-2.16	0.029	ATP10A	-2.89	0.013	LINC02334	-3.89	< 0.001
S1 POSTc RPMI ST vs T0	GAPDH	2.59	0.001	ZNF66	-2.47	0.004	DUXAP8	-7.07	0.005	ZNF658	-6.99	0.007
S1 POSTc RPMI ST vs T0	TPI1	3.41	< 0.001	C21orf58	-4.27	0.006	MT-TL1	2.5	0.003	TPTE	-7.07	0.005
S1 POSTc RPMI ST vs T0	ENO2	1.88	0.022	ZNF714	-3.27	0.006	MT-TV	5.55	< 0.001	U2	-3.23	0.021
S1 POSTc RPMI ST vs T0	HCFC2	-3.8	0.02	TOR2A	-3.54	0.041	MT-TS1	-2.17	0.01	LINC01297	-4.79	< 0.001
S1 POSTc RPMI ST vs T0	KLRB1	-3.42	< 0.001	PCSK7	-2.1	0.012	MT-TD	2.98	0.036	U2	-4.21	0.007
S1 POSTc RPMI ST vs T0	FRK	-3.39	< 0.001	CD3G	-2.07	0.011	MT-TR	3.23	0.039	LINC00547	-2.95	0.01
S1 POSTc RPMI ST vs T0	PAK1IP1	2.51	0.029	CHTOP	1.91	0.028	GNRHR2	-4.32	< 0.001	CCL4	6.88	< 0.001
S1 POSTc RPMI ST vs T0	ADTRP	-2.28	0.035	FDPS	2.14	0.009	IGKC	-2.92	< 0.001	RP11-615I2.6	-2.79	0.031
S1 POSTc RPMI ST vs T0	RIPOR2	-3.26	< 0.001	RUSC1	-3.95	0.012	IGKV4-1	-2.81	0.003	RP11-322E11.2	-2.42	0.01
S1 POSTc RPMI ST vs T0	STK38	-2.64	0.011	LMNA	1.74	0.043	IGKV3D-20	-2.91	0.001	RP11-368I7.6	-2.19	0.047
S1 POSTc RPMI ST vs T0	IL17A	9.12	< 0.001	PPP1R35	-4.58	0.002	IGKV3D-11	-3.73	< 0.001	SIK1B	-7.15	0.004
S1 POSTc RPMI ST vs T0	IL17F	10.19	< 0.001	GPATCH4	1.86	0.032	IGLV4-69	-3.38	0.004	CCL4L2	6.5	< 0.001
S1 POSTc RPMI ST vs T0	MCM3	2.34	0.018	FCRL3	2.99	0.018	IGLV8-61	-5.12	< 0.001	CCL3L1	9.58	< 0.001
S1 POSTc RPMI ST vs T0	CD83	2.92	< 0.001	NAPEPLD	-4.43	0.003	IGLV6-57	-5.02	< 0.001	RN7SL1	-2.49	0.013
S1 POSTc RPMI ST vs T0	MED23	-2.4	0.009	PSMC2	1.8	0.031	IGLV1-51	-3.83	< 0.001	RP11-116D17.4	-2.51	0.012
S1 POSTc RPMI ST vs T0	GPLD1	-3.95	0.012	PLXDC1	-7.15	0.004	IGLV1-50	-2.91	0.01	IGKV1D-13	-3.03	0.032
S1 POSTc RPMI ST vs T0	GMNN	4.3	0.01	ACOX1	-3.29	0.017	IGLV1-47	-3.21	< 0.001	STAG3L2	-1.79	0.043
S1 POSTc RPMI ST vs T0	HECA	-2.07	0.025	ZNF577	-1.99	0.042	IGLV7-46	-7.22	0.003	CCL3-AS1	8.85	< 0.001
S1 POSTc RPMI ST vs T0	CCR6	-2.77	0.003	TNFSF13	-6.81	0.012	IGLV5-45	-7.76	< 0.001	RP11-146E13.4	-4.21	< 0.001
S1 POSTc RPMI ST vs T0	BICRAL	-4.75	0.001	EIF4A1	2.07	0.011	IGLV1-44	-2.94	0.001	SPANXA2-OT1	-2.7	0.002
S1 POSTc RPMI ST vs T0	VEGFA	2.25	0.014	POLR3K	2.68	0.011	IGLV1-40	-2.91	0.002	CCL3	9.98	< 0.001
S1 POSTc RPMI ST vs T0	SLC29A1	9.8	< 0.001	SPSB3	-1.74	0.042	IGLV1-36	-2.82	0.016	PSMB3	2.18	0.008
S1 POSTc RPMI ST vs T0	LAMA4	-4.14	< 0.001	LBHD1	1.81	0.039	IGLV2-23	-3.43	< 0.001	FAM230A	-3.23	0.007
S1 POSTc RPMI ST vs T0	LY86	-7.07	0.005	RPS6KA4	-7.07	0.005	IGLV3-21	-2.14	0.022	U2	-3.16	0.021
S1 POSTc RPMI ST vs T0	HMGCS1	2.74	0.003	AK4	3.84	< 0.001	IGLV2-14	-3.55	< 0.001	SENP3-EIF4A1	2.12	0.012
S1 POSTc RPMI ST vs T0	NNT	-2.7	0.002	KIAA1522	7.13	0.005	IGLV3-10	-5.05	< 0.001	CTB-58E17.1	2.77	0.034
S1 POSTc RPMI ST vs T0	HSPA9	1.88	0.022	TMCO4	-3.88	0.015	IGLV3-9	-3.81	0.001	CISD3	2.33	0.02
S1 POSTc RPMI ST vs T0	HBEGF	4.13	< 0.001	GBP2	3.27	< 0.001	IGLV3-1	-2.37	0.018	GLIDR	-7.07	0.005
S1 POSTc RPMI ST vs T0	GZMK	-4.87	< 0.001	PEA15	3.17	0.001	IGLC1	-2.85	< 0.001	IGLV2-8	-2.91	< 0.001
S1 POSTc RPMI ST vs T0	HAVCR1	-3.54	0.041	SLAMF6	-2.9	0.009	IGLC2	-3.12	< 0.001	POTEB3	-4.02	0.01
S1 POSTc RPMI ST vs T0	RASGRF2	-2.98	0.007	FCGR3B	-7.42	0.002	IGLC3	-3.14	< 0.001	U2	-2.67	0.043
S1 POSTc RPMI ST vs T0	GABRG2	-3.54	< 0.001	BPNT1	2.01	0.019	IGLC7	-4.09	0.008	C11orf98	1.98	0.025
S1 POSTc RPMI ST vs T0	ARRDC3	-3.04	0.003	FCMR	-2	0.027	TRBV19	-2.7	0.021	RN7SL3	-2.85	0.025
S1 POSTc RPMI ST vs T0	TARS1	2.95	< 0.001	KIAA1841	-3.88	0.015	IGHG4	-2.73	0.003	CTC-448F2.7	-2.47	0.043
S1 POSTc RPMI ST vs T0	IL4	7.45	0.002	IWS1	3.04	0.005	IGHG2	-2.89	< 0.001	RP11-67H24.3	-6.81	0.012
S1 POSTc RPMI ST vs T0	ST8SIA4	2.07	0.041	S100A11	2.67	0.001	IGHG1	-3.27	< 0.001	RP11-39H3.2	-2.47	0.043
S1 POSTc RPMI ST vs T0	SEC24A	3.67	0.004	DHX57	-3.06	0.007	IGHG3	-3.24	< 0.001	CH507-513H4.1	-4.31	< 0.001
S1 POSTc RPMI ST vs T0	HRH2	-2.44	0.046	S100A9	-10.1	< 0.001	IGHM	-2.79	< 0.001	CTC-490E21.11	-2.47	0.009
S1 POSTc RPMI ST vs T0	DBN1	4.85	0.002	S100A12	-7.22	0.003	IGHJ2	-3.8	0.02	RP11-264L1.2	-2.24	0.014
S1 POSTc RPMI ST vs T0	SELENOK	1.71	0.039	MRPS18C	2.72	0.001	IGHV1-2	-3.43	0.004	CTD-2144E22.9	-4.09	0.001
S1 POSTc RPMI ST vs T0	BCL6	2.77	0.034	GPR155	-2.57	0.008	IGHV2-5	-3.15	0.005	CTA-212A2.3	-2.43	0.023
S1 POSTc RPMI ST vs T0	ARL6	-6.81	0.012	PBXIP1	-2.12	0.018	IGHV3-7	-2.56	0.008	CH17-264L24.1	-2.64	0.011
S1 POSTc RPMI ST vs T0	NPHP3	-4.16	< 0.001	EIF4E3	-2.91	0.001	IGHV3-11	-3.4	0.002	PRAL	-2.45	0.007
S1 POSTc RPMI ST vs T0	FAM162A	2.5	0.003	TRIM46	-4.58	0.002	IGHV3-15	-3.19	0.008	RP11-411B10.7	-7.99	< 0.001
S1 POSTc RPMI ST vs T0	CEP70	-3.8	0.02	STT3B	-2.22	0.042	IGHV3-20	-4.43	0.003	RP11-382B18.1	-3.65	< 0.001
S1 POSTc RPMI ST vs T0	IFT57	2.14	0.032	FCRL1	-7.9	< 0.001	IGHV3-21	-3.05	0.005	LA16c-60D12.2	-1.95	0.044
S1 POSTc RPMI ST vs T0	HHLA2	-4.71	0.001	AIM2	4.66	< 0.001	IGHV3-23	-2.87	0.002	RP11-426D19.1	-4.25	< 0.001
S1 POSTc RPMI ST vs T0	IQCG	2.85	0.007	ICA1L	-6.9	0.009	IGHV3-33	-3.13	< 0.001	AP000432.3	-3.84	< 0.001
S1 POSTc RPMI ST vs T0	UMPS	2.77	0.002	ICOS	2.04	0.017	IGHV4-34	-3.72	0.025	RP11-609N14.4	-3.21	< 0.001
S1 POSTc RPMI ST vs T0	FRMD4B	2.67	0.003	CCDC191	-7.49	0.002	IGHV4-39	-2.37	0.022	CTC-304I17.6	-3.04	0.004
S1 POSTc RPMI ST vs T0	SLC41A3	-2.34	0.037	C4orf36	-2.6	0.006	IGHV1-46	-3.27	0.006	RP11-70L8.5	-4.79	< 0.001
S1 POSTc RPMI ST vs T0	CFAP92	-2.52	0.038	PSMD6	1.64	0.05	IGHV3-48	-2.78	0.012	CTA-212A2.2	-4.21	0.007
S1 POSTc RPMI ST vs T0	CISH	2.28	0.008	CXCL3	8.37	< 0.001	IGHV3-53	-4.71	0.001	RP11-700A24.1	-2.44	0.008
S1 POSTc RPMI ST vs T0	TTL	-2.97	0.005	MTHFD2L	-3.88	0.015	IGHV4-61	-2.64	0.011	GS1-124K5.13	-2.5	0.039
S1 POSTc RPMI ST vs T0	CCL20	13.45	< 0.001	PLSCR2	-7.15	0.004	IGHV3-66	-3.03	0.032	RP11-624A21.1	-3.49	< 0.001
S1 POSTc RPMI ST vs T0	NCL	1.78	0.028	SNRK	-2.27	0.021	IGHV1-69	-3.29	0.017	RP11-334E15.1	-3.23	0.001
S1 POSTc RPMI ST vs T0	CYTIP	1.97	0.016	KIF15	-7.15	0.004	RNY4P18	-4.09	0.008	XXbac-BPG283O16.9	-3.79	< 0.001
S1 POSTc RPMI ST vs T0	ITGA4	-2.12	0.027	WDR43	1.82	0.041	LINC01089	-7.29	0.003	RP11-463O12.5	-3.75	0.004
S1 POSTc RPMI ST vs T0	ASB3	-2.07	0.013	ZNF148	-1.9	0.037	SFT2D2	-2.44	0.004	AP000892.6	-2.33	0.013
S1 POSTc RPMI ST vs T0	INO80B	2.05	0.048	NMNAT3	-3.08	< 0.001	LPAL2	-3.2	< 0.001	RP3-466P17.3	-3.85	< 0.001
S1 POSTc RPMI ST vs T0	SPTBN1	-2.83	0.002	POLR2H	2.9	< 0.001	RP11-306O13.1	-2.38	0.011	RP11-145P16.2	-2.73	0.011
S1 POSTc RPMI ST vs T0	HTRA2	3.16	0.001	GNL3	2.14	0.009	FAM24B	-3.54	0.041	LA16c-60D12.1	-2.59	0.006
S1 POSTc RPMI ST vs T0	POLE4	-2.03	0.038	UVSSA	-2.55	0.011	GSTM2	-3.58	< 0.001	RP11-438L7.1	-2.97	0.001
S1 POSTc RPMI ST vs T0	MRPL19	2.13	0.035	ARHGEF3	-4.87	< 0.001	FIRRE	-6.99	0.007	RP11-80P20.3	-2.45	0.017
S1 POSTc RPMI ST vs T0	STAT1	2.41	0.003	ZNF691	-6.99	0.007	SRA1	2.15	0.017	IGHV1-69D	-3.23	0.021
S1 POSTc RPMI ST vs T0	DNAH6	-3.8	0.02	H2AZ1	2.06	0.011	VDAC1	2.35	0.004	CH507-528H12.1	-4.43	< 0.001
S1 POSTc RPMI ST vs T0	ELMOD3	-2.5	0.039	ZNF589	2.37	0.036	CLIC1	1.7	0.038	CH17-172B3.1	-3.08	0.003
S1 POSTc RPMI ST vs T0	CCT4	1.93	0.019	SPRY1	1.94	0.038	ZNF337-AS1	-2.95	0.01	CCDC163	-3.8	0.02
S1 POSTc RPMI ST vs T0	GNLY	1.98	0.014	INTU	-2.63	0.002	GALT	-2.79	0.003	LINC01943	5.21	< 0.001
S1 POSTc RPMI ST vs T0	ST3GAL5	-2.42	0.04	RNF123	4.22	0.012	AP1G2	-2.1	0.019	LINC01232	-2.05	0.017
S1 POSTc RPMI ST vs T0	HSPE1	3.13	< 0.001	MON1A	-3.72	0.025	TTLL3	-2.11	0.032	EIF1B-AS1	-2.11	0.012
S1 POSTc RPMI ST vs T0	IL1R2	7.93	< 0.001	CEP44	-3.06	0.007	MRPL23	1.91	0.028	RP11-294C11.4	-3.76	0.001
S1 POSTc RPMI ST vs T0	IL1R1	4.05	0.02	HPGD	2.42	0.013	LINC02418	-3.54	0.041	GHET1	-4.04	< 0.001
S1 POSTc RPMI ST vs T0	STK25	1.89	0.035	ABCE1	1.93	0.029	SH3D21	2.68	0.018	HELLPAR	-3.02	< 0.001
S1 POSTc RPMI ST vs T0	ID2	1.74	0.034	OTUD4	1.76	0.034	SCART1	-4.02	0.01	ARRDC3-AS1	-3.23	< 0.001
S1 POSTc RPMI ST vs T0	TAF1B	2.82	0.005	ADGRV1	-3.47	0.003	PDPR2P	-4.15	0.008	LINC00506	-3.56	< 0.001
S1 POSTc RPMI ST vs T0	NOL10	1.88	0.034	STARD4	2.99	0.018	KANSL1-AS1	-3.95	0.012	SEPSECS-AS1	-2.96	< 0.001
S1 POSTc RPMI ST vs T0	PLEKHB2	1.74	0.046	SERINC5	-3.88	< 0.001	MS4A4E	-2.02	0.023	CH17-195P21.2	-3.1	0.002
S1 POSTc RPMI ST vs T0	KYNU	-2.6	0.003	CSF2	12.06	< 0.001	COL28A1	-4.63	< 0.001	CH17-118O6.6	-3.1	0.002
S1 POSTc RPMI ST vs T0	ORC4	-3.26	< 0.001	SAMD3	-2.95	0.003	CD27-AS1	-2.26	0.016	LINC00891	-3.05	< 0.001
S1 POSTc RPMI ST vs T0	NFE2L2	2.14	0.018	PI16	-8.73	< 0.001	AC025171.1	-3.89	< 0.001	IGHV7-4-1	-6.9	0.009
S1 POSTc RPMI ST vs T0	EPHA4	-4.43	0.003	DAGLB	-2.43	0.023	RP11-1023L17.1	-2.41	0.03	LINC01002	-2.01	0.045
S1 POSTc RPMI ST vs T0	DNAJC16	-2.72	0.014	PTTG1	1.83	0.034	OR7E122P	-3.79	0.003	IGHV3-69-1	-2.95	0.039
S1 POSTc RPMI ST vs T0	MARK1	-2.65	0.025	SYTL3	3.07	< 0.001	DHRS4-AS1	-3.86	< 0.001	RP11-596C23.6	-2.59	0.005
S1 POSTc RPMI ST vs T0	CACYBP	2.19	0.008	FABP5	1.9	0.041	NPEPL1	-2.38	0.011	RP11-317C20.9	-4.58	0.002
S1 POSTc RPMI ST vs T0	ELAPOR1	-4.63	0.002	KCNV1	-3.74	< 0.001	FAM230B	-2.79	0.015	GTF2IP12	-2.27	0.015
S1 POSTc RPMI ST vs T0	DOCK7	-2.95	0.01	CSMD3	-7.85	< 0.001	TNFRSF25	-2.23	0.008	TCAF2C	2.91	0.043
S1 POSTc RPMI ST vs T0	LEPR	-3.23	0.007	OSGIN2	2.99	0.018	LINC01356	-2.72	0.014	RP11-298A10.3	3.06	< 0.001
S1 POSTc RPMI ST vs T0	GADD45A	2.61	0.003	GEM	5.47	< 0.001	CYB5RL	-3.23	0.007	RP11-57A19.7	-4.16	< 0.001
S1 POSTc RPMI ST vs T0	CFHR3	-3.54	0.041	TMEM67	-3.23	0.021	LY86-AS1	-2.63	0.02	RP11-419I17.1	-2.7	0.001
S1 POSTc RPMI ST vs T0	ADPRS	3.04	0.025	MYORG	-2.21	0.017	RP11-465B22.3	5.54	< 0.001	RP5-1044O17.1	-3.4	0.012
S1 POSTc RPMI ST vs T0	GBP1	2.1	0.014	NFIL3	4.22	0.012	PAM16	1.74	0.045	SCO2	3.39	0.005
S1 POSTc RPMI ST vs T0	CR2	-2.67	0.043	RASEF	-3.12	0.004	MIF-AS1	2.5	0.002	RP11-470M1.2	-3.55	0.001
S1 POSTc RPMI ST vs T0	SLC2A1	1.82	0.043	GKAP1	-7.49	0.002	FAM228B	-2.7	0.001	RP11-340I6.13	-2.66	0.018
S1 POSTc RPMI ST vs T0	PTCH2	-3.72	0.025	KIF27	-3.95	0.012	VAMP2	-2.29	0.011	LINC01226	-2.05	0.035
S1 POSTc RPMI ST vs T0	PRDX1	2.36	0.004	DYNLT3	2.3	0.022	PPP3CB-AS1	-4.09	0.008	RP11-379B18.8	-4.09	< 0.001
S1 POSTc RPMI ST vs T0	FASLG	3.86	0.032	PIGA	4.07	< 0.001	OR2A25	-3.95	0.012	RP11-726G1.2	1.71	0.045
S1 POSTc RPMI ST vs T0	DARS2	2	0.023	MELK	-6.99	0.007	TIGD1	-1.86	0.027	XXbac-BPG171B11.8	-4.95	< 0.001
S1 POSTc RPMI ST vs T0	RCAN3	-2.46	0.004	ARHGAP12	-4.38	0.004	XKR9	-3.5	< 0.001	RP1-58B11.2	-2.5	0.039
S1 POSTc RPMI ST vs T0	RCOR3	-2.38	0.011	TSHR	-2.73	0.003	PPT2	4.37	0.008	RP11-158C6.4	-2.37	0.012
S1 POSTc RPMI ST vs T0	RCN2	-3.75	0.004	CRYL1	-2.27	0.026	POTEM	-3.63	0.032	CCDC39	-3.7	0.004
S1 POSTc RPMI ST vs T0	DDX59	-2.7	0.021	KLHDC2	-2.5	0.022	CYTOR	2.69	0.001	RP11-114N19.3	-2.06	0.013
S1 POSTc RPMI ST vs T0	C1orf54	-6.9	0.009	NUDT5	2.06	0.015	RNU4-62P	-3.95	0.012	RP11-281A20.2	-7.22	0.003
S1 POSTc RPMI ST vs T0	IRAG2	-1.9	0.048	PRDX3	2.12	0.021	LINC02068	-6.9	0.009	CTD-2515O10.6	2.28	0.005
S1 POSTc RPMI ST vs T0	ATP10B	-4	< 0.001	HPRT1	2.18	0.018	RP11-131L23.1	-2	0.027	RP11-240L7.5	-2.11	0.033
S1 POSTc RPMI ST vs T0	SGK1	1.97	0.026	BORCS5	-2.52	0.038	RPL34P26	-2.95	0.039	RP11-274H24.2	-2.85	0.025
S1 POSTc RPMI ST vs T0	SLC16A7	-3.16	< 0.001	DDX21	2.26	0.006	LINC01422	-2.21	0.036	RP11-397E7.6	-2.83	0.002
S1 POSTc RPMI ST vs T0	RXYLT1	-3.91	0.002	NDRG2	-2.09	0.027	LINC01208	-7.07	0.005	RP11-826N14.7	-7.36	0.002
S1 POSTc RPMI ST vs T0	ARMC2	-7.07	0.005	ARHGEF40	-3.72	0.025	CCDC18-AS1	-4.19	< 0.001	LINC00941	-3.1	0.007
S1 POSTc RPMI ST vs T0	KLF12	-4.43	0.003	C12orf50	-2.95	< 0.001	TSSC2	-2.28	0.016	RELA-DT	-7.15	0.004
S1 POSTc RPMI ST vs T0	ELL2	3.89	< 0.001	HSPA12A	-2.87	0.012	LINC00205	-7.22	0.003	RP11-19D22.1	-3.16	< 0.001
S1 POSTc RPMI ST vs T0	C1orf198	4.57	0.004	PSMC3	2.05	0.013	EFCAB6-AS1	-3.24	< 0.001	RP11-253D19.3	-2.14	0.031
S1 POSTc RPMI ST vs T0	HSDL2	-5.18	< 0.001	AGBL2	-3.8	0.02	HLA-DPB1	-1.68	0.043	RP11-172F7.1	-2.87	0.003
S1 POSTc RPMI ST vs T0	NR4A3	2.42	0.032	TC2N	-4.36	< 0.001	LINC01707	-3	0.015	RP11-139D23.7	-4.87	< 0.001
S1 POSTc RPMI ST vs T0	CSF3R	-4.71	0.001	MOAP1	-2.79	0.001	OSER1-DT	-2.11	0.044	CTD-2117H17.2	-2.5	0.039
S1 POSTc RPMI ST vs T0	NEK9	-1.76	0.045	ARL5B	3.14	0.048	RP11-33A14.1	-7.15	0.004	RP11-395N17.3	-2.38	0.033
S1 POSTc RPMI ST vs T0	TTLL5	-2.66	0.018	TCP11L2	-3.21	0.004	RP5-1180C18.1	-3.77	< 0.001	RP11-105G5.2	-3.54	0.041
S1 POSTc RPMI ST vs T0	TGFB3	-2.49	0.032	RAB8B	3.06	0.001	ROR1-AS1	-2.37	0.006	RP11-661D17.1	-3.69	0.001
S1 POSTc RPMI ST vs T0	SLIRP	2.35	0.004	IKBIP	3.78	0.007	CHROMR	-2.32	0.027	RP11-314A5.7	-4.95	< 0.001
S1 POSTc RPMI ST vs T0	GPR68	3.39	0.01	NOLC1	1.74	0.042	IGKV3D-15	-3.22	< 0.001	MICF	-3.03	0.032
S1 POSTc RPMI ST vs T0	COQ6	-2.34	0.037	SGPL1	2.07	0.048	SNHG14	-2.2	0.007	CTD-2143A15.1	-3.25	0.001
S1 POSTc RPMI ST vs T0	ATAD2B	-3.26	0.006	FRS2	4.51	0.005	SLC44A3-AS1	-3.7	0.004	RP11-640I2.2	-3.52	< 0.001
S1 POSTc RPMI ST vs T0	BCL11A	-6.4	< 0.001	CCT2	1.69	0.043	WARS2-IT1	-2.01	0.04	LINC02822	-5.55	< 0.001
S1 POSTc RPMI ST vs T0	IFIT3	2.03	0.038	TPP1	-2.41	0.004	RP11-191L9.4	-3.95	0.012	CH507-528H12.10	-8.51	< 0.001
S1 POSTc RPMI ST vs T0	IFIT2	-3.29	0.017	POTED	-6.9	0.009	IGHV4-59	-2.87	0.01	RP11-342K6.5	-1.86	0.04
S1 POSTc RPMI ST vs T0	DUSP1	-3.96	< 0.001	IFTAP	-2.25	0.007	PRR29	-7.49	0.002	SLFN12L	-4.58	0.002
S1 POSTc RPMI ST vs T0	TEK	-7.07	0.005	ATP9B	-2.58	0.002	OR6D1P	-2.45	0.004	RP11-686F15.4	-8.29	< 0.001
S1 POSTc RPMI ST vs T0	CD274	3.34	0.011	ZMAT1	-4.16	< 0.001	HSP90AA2P	2.07	0.022	RP11-622O11.6	-2.87	0.001
S1 POSTc RPMI ST vs T0	MTHFD1L	3.62	< 0.001	TRIM66	-7.6	0.001	PRKAR2A-AS1	-3.63	0.032	AC006115.7	-3.43	< 0.001
S1 POSTc RPMI ST vs T0	CYSTM1	3.74	< 0.001	NDST2	-2.49	0.032	LINC00539	-6.99	0.007	RP11-123O22.2	-7.15	0.004
S1 POSTc RPMI ST vs T0	TCP1	2.51	0.003	CLEC4E	-7.99	< 0.001	LINC01087	-3.03	0.032	CH507-528H12.12	-8.42	< 0.001
S1 POSTc RPMI ST vs T0	SNX19	-2.91	0.01	CENPV	-7.22	0.003	LINC01886	-6.81	0.012	AC003099.2	-3.42	< 0.001
S1 POSTc RPMI ST vs T0	NUDCD1	1.92	0.032	CIAO2B	2.96	< 0.001	RP11-153F1.1	-3.63	0.032	CH507-528H12.3	-7.42	0.002
S1 POSTc RPMI ST vs T0	ENY2	1.66	0.046	BLCAP	-2.09	0.024	RTCA-AS1	-2.39	0.004	CH507-513H4.7	-7.42	0.002
S1 POSTc RPMI ST vs T0	MASTL	-6.81	0.012	SLFN5	-2.24	0.009	IGHV3-74	-3.83	0.003	AC007666.5	-2.17	0.022
S1 POSTc RPMI ST vs T0	EPC1	-1.85	0.029	FAM111A	-2.1	0.016	SH3BP5-AS1	-2.85	0.014	VIM2P	-3.14	0.001
S1 POSTc RPMI ST vs T0	MTRF1	-3.41	0.004	PCLAF	-3.32	0.005	RASAL2-AS1	-2.96	0.001	CH507-513H4.10	-8.57	< 0.001
S1 POSTc RPMI ST vs T0	HSPH1	2.46	0.004	NAB2	3.13	0.012	RP11-538D16.2	-3.66	< 0.001	RP11-1077A2.2	2.57	0.021
S1 POSTc RPMI ST vs T0	TGFBI	-8.6	< 0.001	ATP23	-3.87	< 0.001	RP11-535M15.1	-7.49	0.002	RP11-783K16.16	2.19	0.012
S1 POSTc RPMI ST vs T0	PAIP2	1.68	0.042	C15orf48	3.39	0.001	POT1-AS1	-3.93	< 0.001	CH507-528H12.4	-7.42	0.002
S1 POSTc RPMI ST vs T0	EGR1	5.45	< 0.001	MS4A7	-6.81	0.012	AP001347.6	-3.95	0.012	RP11-510D4.1	-1.87	0.037
S1 POSTc RPMI ST vs T0	ARL1	2.2	0.015	B4GALNT2	-4.43	0.003	RP11-441O15.3	-2.74	0.003	CTB-53D8.2	-3.39	< 0.001
S1 POSTc RPMI ST vs T0	DUSP4	3.17	< 0.001	PBX3	-6.99	0.007	XXbac-BPG55C20.7	-9.52	< 0.001	RP11-454P7.5	-3.65	< 0.001
S1 POSTc RPMI ST vs T0	EPHX2	-9.24	< 0.001	PHB	2.53	0.002	GOLGA2P7	3.76	< 0.001	RP11-512C24.4	-4.15	0.008
S1 POSTc RPMI ST vs T0	TRIM25	3.15	< 0.001	FAM102A	-1.89	0.041	PLEKHM1	-2.45	0.017	RP11-2G16.1	-3.52	0.003
S1 POSTc RPMI ST vs T0	ECHDC2	-2.53	0.012	HDHD2	-2.49	0.032	LINC01427	-2.49	0.005	RP1-300H18.1	-3.63	0.032
S1 POSTc RPMI ST vs T0	PLBD1	-3.54	0.041	ZNF91	-2.54	0.007	BOLA3-AS1	-6.9	0.009	RP11-391D19.1	-8.07	< 0.001
S1 POSTc RPMI ST vs T0	CSTA	-4.43	0.003	DPEP2	-8.98	< 0.001	MKRN2OS	-3.8	0.02	RP11-816B18.1	-3.2	< 0.001
S1 POSTc RPMI ST vs T0	NAA50	2.03	0.027	ENGASE	-4.15	0.008	LINC01821	-2.79	0.015	RP4-738P15.7	-3.24	< 0.001
S1 POSTc RPMI ST vs T0	CSMD2	-7.22	0.003	NIBAN3	-2.83	0.013	LINC01623	-2.88	0.048	RP11-56L13.8	-7.99	< 0.001
S1 POSTc RPMI ST vs T0	ACVR2A	-7.15	0.004	PROCA1	-6.9	0.009	MCRIP1	1.66	0.048	RP1-199L16.2	-2.89	< 0.001
S1 POSTc RPMI ST vs T0	MRPS2	3.09	0.013	TUBA1C	3.4	< 0.001	PTPRD-AS1	-3.91	0.002	RP4-644F6.4	-2.69	0.016
S1 POSTc RPMI ST vs T0	ODF2L	-2.38	0.004	LAIR1	-2.71	0.023	MIAT	-2.01	0.015	RP3-487J7.4	-3.55	< 0.001
S1 POSTc RPMI ST vs T0	RWDD3	-3.1	0.001	KIR3DL1	7.13	0.005	ERCC6	-4.15	0.008	RP4-681L3.3	-2.69	0.009
S1 POSTc RPMI ST vs T0	RPAP2	-3.29	< 0.001	TMIGD2	-7.22	0.003	AC074289.1	-8.87	< 0.001	RP11-124O5.2	-4.02	0.01
S1 POSTc RPMI ST vs T0	EEPD1	-3.8	0.02	WDR81	-7.15	0.004	TSBP1-AS1	-2.39	0.004	RP11-399E6.5	-7.6	0.001
S1 POSTc RPMI ST vs T0	HERPUD2	-1.87	0.026	SRR	3.86	0.032	PCA3	-3.73	< 0.001	CTC-352D11.1	-4.87	< 0.001
S1 POSTc RPMI ST vs T0	INHBA	4.42	< 0.001	CDK2AP2	3.2	< 0.001	AC009950.2	-2.73	0.036	RP11-2B2.1	-3.67	< 0.001
S1 POSTc RPMI ST vs T0	NT5C3A	1.83	0.041	TMC8	-3.21	< 0.001	NRIR	-6.99	0.007	RP11-237N2.1	-2.68	0.001
S1 POSTc RPMI ST vs T0	CALD1	5	0.001	TK1	-2.67	0.043	RP11-57H12.3	-2.68	0.002	RP1-168L15.7	-2.49	0.006
S1 POSTc RPMI ST vs T0	SRGN	2.02	0.012	TMEM99	-2.9	0.009	LINC01776	-4.02	0.01	RP11-20M7.1	-2.7	0.021
S1 POSTc RPMI ST vs T0	CISD1	2.19	0.014	RAB26	5.5	< 0.001	LINC00685	2.64	0.046	RP11-108K14.13	-3.63	0.032
S1 POSTc RPMI ST vs T0	EGR2	11.42	< 0.001	MLST8	-7.42	0.002	AC058791.1	2.9	0.002	RP11-567P17.5	-2.17	0.008
S1 POSTc RPMI ST vs T0	P4HA1	3.89	< 0.001	ABCA3	-6.81	0.012	SLC16A1-AS1	-2.33	0.015	CTD-2215E18.4	-3.73	< 0.001
S1 POSTc RPMI ST vs T0	CCDC91	-2.59	0.006	NLRC3	-2.92	0.003	LINC01748	-7.42	0.002	RP11-725P16.3	-3.39	< 0.001
S1 POSTc RPMI ST vs T0	ACOT9	1.74	0.043	SLC3A2	1.96	0.018	LINC00343	-1.84	0.033	RP11-490F3.3	-3.26	< 0.001
S1 POSTc RPMI ST vs T0	PRDX4	3.27	< 0.001	TRANK1	-5.55	< 0.001	ENTPD1-AS1	-2.32	0.007	RP11-58N22.1	-3.1	0.004
S1 POSTc RPMI ST vs T0	DDX39A	1.8	0.034	ULK4	-2.64	0.03	FAM30A	-3.8	0.02	RP4-660H19.2	-4.79	< 0.001
S1 POSTc RPMI ST vs T0	SPRYD7	3.42	0.001	LTBP3	-3.88	0.015	TBCAP1	-3.03	0.032	RP11-645I23.1	-3.38	< 0.001
S1 POSTc RPMI ST vs T0	CENPK	-1.95	0.035	RBPJ	1.7	0.04	LINC02611	-9	< 0.001	RP11-663P9.3	-7.07	0.005
S1 POSTc RPMI ST vs T0	NR4A1	2.49	0.004	TTC39C	-3	0.002	LTA	3.53	< 0.001	RP4-592A1.5	-2.63	0.003
S1 POSTc RPMI ST vs T0	TUBA1B	2.25	0.006	IRF2BP2	-1.88	0.039	SLC8A1-AS1	-6.81	0.012	CTA-392G7.1	-3.28	0.003
S1 POSTc RPMI ST vs T0	NDUFAF4	2.17	0.017	MFSD2A	4.9	0.001	LINC00629	-2.79	0.001	RP11-76P17.4	-3.22	< 0.001
S1 POSTc RPMI ST vs T0	RAB9A	2.83	0.029	TAP1	1.89	0.028	LMCD1-AS1	-3.38	0.002	RP11-753A21.3	-2.11	0.044
S1 POSTc RPMI ST vs T0	BATF3	5.47	< 0.001	CMAHP	2.59	0.007	LINC01630	-4.09	0.008	RP11-316A16.2	-2.64	0.03
S1 POSTc RPMI ST vs T0	COQ8B	-2.9	0.006	STIP1	2.41	0.004	RP11-165F24.3	-7.76	< 0.001	RP3-466I7.2	-2.85	0.025
S1 POSTc RPMI ST vs T0	CKS2	2.59	0.011	RAB31	-7.99	< 0.001	RP11-203J24.8	-2.44	0.046	RP11-259K21.6	-2.03	0.038
S1 POSTc RPMI ST vs T0	CTCFL	-3.79	0.003	POLR3D	2.43	0.011	AC105760.2	-1.95	0.026	RP13-512J5.2	-2.71	0.005
S1 POSTc RPMI ST vs T0	SDC4	3.72	0.008	IL7R	-2.26	0.006	TP73-AS1	-4.02	0.01	RP11-412N9.1	-6.81	0.012
S1 POSTc RPMI ST vs T0	ZNF831	-4.25	< 0.001	TMEM208	1.75	0.045	RP13-188A5.1	-3.2	< 0.001	RP1-274L7.5	-3.1	< 0.001
S1 POSTc RPMI ST vs T0	ZBP1	-4.79	< 0.001	NSG1	-2.93	0.003	LTB	-2.95	< 0.001	RP11-362H12.2	-2	0.043
S1 POSTc RPMI ST vs T0	ATP8A1	-8.03	< 0.001	SFTPB	-4.09	0.008	RP11-301G19.1	-3.85	< 0.001	RP11-23I22.1	-7.6	0.001
S1 POSTc RPMI ST vs T0	TRERF1	-3.67	0.002	TMEM150A	4.22	< 0.001	RP1-283E3.4	-4.48	0.003	RP1-154K9.3	-3.1	0.026
S1 POSTc RPMI ST vs T0	SIRT5	-1.85	0.047	RNF181	1.78	0.032	AC007383.3	-3.88	0.015	RP11-205A6.1	-6.99	0.007
S1 POSTc RPMI ST vs T0	WRNIP1	1.87	0.047	LRRC28	-3.88	0.015	LINC01515	-7.65	< 0.001	RP3-425C14.8	-4.01	< 0.001
S1 POSTc RPMI ST vs T0	ABCC10	-2.52	0.038	HSPBAP1	-2.9	0.009	AC003991.3	-3.73	< 0.001	RP11-799O21.2	-3.04	< 0.001
S1 POSTc RPMI ST vs T0	MAD2L1BP	1.86	0.037	IL13	9.7	< 0.001	OR2M3	-3.72	< 0.001	RP11-404C6.6	-3.64	< 0.001
S1 POSTc RPMI ST vs T0	CDKN1A	3.45	< 0.001	OR10G3	-3.04	0.004	GRASLND	-1.76	0.047	RP11-26A3.1	-2.78	0.012
S1 POSTc RPMI ST vs T0	SOX4	-4.34	< 0.001	RAB3B	-2.32	0.009	IGKV3D-7	-3.79	0.003	AC006296.4	-4.81	< 0.001
S1 POSTc RPMI ST vs T0	SLC35B3	-2.15	0.043	CA5B	-2.63	0.005	OR9H1P	-2.33	0.005	RP11-379L12.1	-7.29	0.003
S1 POSTc RPMI ST vs T0	RUNX2	-2.26	0.01	CXCL10	7.13	0.005	LINC02263	-3.51	0.008	RP11-154D6.3	-4	< 0.001
S1 POSTc RPMI ST vs T0	AHNAK	-2.39	0.006	SNUPN	1.93	0.04	AC015971.2	-3.23	0.021	RP11-339H12.2	-2.95	0.005
S1 POSTc RPMI ST vs T0	SH3TC1	-4.09	0.008	CRADD	2.48	0.006	AC004951.6	-2.09	0.041	RP11-511B7.2	-3.99	0.002
S1 POSTc RPMI ST vs T0	BBS2	-3.55	< 0.001	PTK2	-4.87	< 0.001	LINC01546	-7.81	< 0.001	CTD-2007H18.2	-3.03	< 0.001
S1 POSTc RPMI ST vs T0	MT2A	3.01	< 0.001	CXCL8	4.11	< 0.001	SPCS2P4	1.79	0.04	RP11-33M22.3	-7.22	0.003
S1 POSTc RPMI ST vs T0	IRF1	1.83	0.027	SCN9A	-7.9	< 0.001	AC096558.1	-4.15	0.008	RP11-335E8.3	-2.61	0.005
S1 POSTc RPMI ST vs T0	SLC25A19	3.31	< 0.001	CD52	-4.01	< 0.001	RP1-223B1.1	-4.33	0.005	RP11-527D7.1	-2.37	0.022
S1 POSTc RPMI ST vs T0	MBOAT7	4.05	0.02	HTRA4	-2.09	0.048	RP11-110G21.1	-3.1	0.026	RP1-81D8.7	-2.85	0.001
S1 POSTc RPMI ST vs T0	IL1B	2.82	0.012	GPR183	2.07	0.013	MIR4500HG	-3.35	0.014	RP1-259A10.2	-2.55	0.034
S1 POSTc RPMI ST vs T0	TRIP10	3.71	0.003	DFFB	-5.55	< 0.001	AC010745.2	-3.84	< 0.001	RP11-812F18.1	-2.79	0.031
S1 POSTc RPMI ST vs T0	TNFSF14	2.02	0.045	HEXD	-4.15	0.008	SEPTIN7-DT	-7.29	0.003	RP11-178F10.5	-2.35	0.014
S1 POSTc RPMI ST vs T0	FOSB	-1.8	0.034	BCRP2	-2.88	0.048	CCDC26	-2.65	0.002	RP11-728E14.5	-2.2	0.013
S1 POSTc RPMI ST vs T0	TMX4	-2.79	0.031	ASPSCR1	-3.88	0.015	TTTY10	-3.15	< 0.001	RP11-506N21.1	-2.24	0.008
S1 POSTc RPMI ST vs T0	AP5S1	-3.87	0.002	FASN	3.19	0.002	SNHG31	-3.39	< 0.001	RP5-1128N12.4	-2.24	0.016
S1 POSTc RPMI ST vs T0	PCSK2	-6.81	0.012	MT1E	3.15	0.001	AJ006998.2	-7.81	< 0.001	RP11-536K17.2	-2.7	0.004
S1 POSTc RPMI ST vs T0	FAM110A	-4.68	< 0.001	TAPT1	-2.61	0.043	PATL2	-3.29	< 0.001	RP11-50H7.1	-2.97	0.004
S1 POSTc RPMI ST vs T0	EIF2S2	1.76	0.034	BTD	-2.89	0.013	XIST	-1.64	0.048	RP11-667L17.1	-2.75	0.013
S1 POSTc RPMI ST vs T0	IGFLR1	1.94	0.025	ROBO1	-7.36	0.002	RP11-206L10.4	-6.81	0.012	RP11-279E17.1	-4.02	0.002
S1 POSTc RPMI ST vs T0	THRA	-2.62	0.016	TRIM56	-1.68	0.048	RPS4XP5	-4.71	0.001	RP11-702N8.3	-3.02	< 0.001
S1 POSTc RPMI ST vs T0	PRMT1	2.67	0.001	GUSB	-2.23	0.012	MIR181A1HG	-2.88	0.048	RP11-168F16.1	-2.95	0.001
S1 POSTc RPMI ST vs T0	HTN1	-2.96	0.002	MAP3K2	-2.06	0.048	ELOVL2-AS1	-5.55	< 0.001	RP11-986E7.8	-2.88	0.048
S1 POSTc RPMI ST vs T0	CFP	-6.81	0.012	YWHAG	2.55	0.008	LINC01036	-3.56	0.007	RP11-371H1.1	-3.39	0.005
S1 POSTc RPMI ST vs T0	L3HYPDH	-3.14	0.01	FAM153A	-3.4	0.002	LINC00276	-3.43	0.004	RP11-513H8.2	-2.23	0.016
S1 POSTc RPMI ST vs T0	PLEKHG3	-9.29	< 0.001	UBE2E1	3.48	0.001	FTX	-2.39	0.003	RP11-363F12.1	-3.88	0.015
S1 POSTc RPMI ST vs T0	PRDM7	-6.81	0.012	CCDC144A	-1.88	0.026	AC159540.1	-2.19	0.01	RP11-220I15.1	-2.9	0.001
S1 POSTc RPMI ST vs T0	FAM78A	-3.28	0.002	SLC16A5	-7.29	0.003	AC004237.1	-3.1	0.026	RP11-490P18.1	-4.15	0.008
S1 POSTc RPMI ST vs T0	SLC10A3	-4.43	0.003	STX8	-2.11	0.025	AC024084.1	-3.54	0.041	RP11-354P17.16	-3.23	0.021
S1 POSTc RPMI ST vs T0	BCL11B	-3.24	< 0.001	FRMPD2	-6.9	0.009	KLHL7-DT	-2.57	0.014	AC018730.4	-4.27	0.006
S1 POSTc RPMI ST vs T0	IL22	4.9	0.001	SEMA3E	-2.06	0.014	LINC02558	-2.79	0.003	LINC01949	-3.66	< 0.001
S1 POSTc RPMI ST vs T0	IDUA	-6.9	0.009	CD14	-7.81	< 0.001	LINC00486	-4.02	0.01	RP11-15G6.1	-3.1	0.026
S1 POSTc RPMI US vs T0	TMEM176A	-3.89	0.029	ARMCX5	-4.92	0.002	DELEC1	-2.69	0.02	LINC01934	-2.82	0.013
S1 POSTc RPMI US vs T0	ICA1	-4.69	0.003	HCST	-1.99	0.034	PARP15	-2.38	0.011	LERFS	-7.4	0.005
S1 POSTc RPMI US vs T0	ALS2	-2.41	0.017	HTN1	-2.1	0.037	MAB21L3	-2.17	0.013	LINC00458	-6.96	0.013
S1 POSTc RPMI US vs T0	TFPI	-2.15	0.024	PLEKHG3	-2.92	0.007	KCNK7	-3.74	0.044	RP11-90C4.1	-3.89	0.005
S1 POSTc RPMI US vs T0	CD38	-2.39	0.034	HIVEP3	-6.96	0.013	CEP83	-3.81	0.006	MIR155HG	4.43	0.013
S1 POSTc RPMI US vs T0	SLC25A13	-7.46	0.004	TMEM175	-4.21	0.001	SULT1B1	-2.4	0.008	ANKRD65	-7.63	0.003
S1 POSTc RPMI US vs T0	ST7	7.25	0.009	KDM4B	7.91	0.001	NUDT4	-2.16	0.036	HIPK1-AS1	-7.33	0.006
S1 POSTc RPMI US vs T0	SKAP2	-7.12	0.011	HIP1	-4.03	0.019	RCE1	3.35	0.024	FBXO30-DT	-1.96	0.035
S1 POSTc RPMI US vs T0	MCUB	1.97	0.044	FGL2	-3.89	0.029	C11orf80	-3.96	0.023	OLMALINC	-2.46	0.005
S1 POSTc RPMI US vs T0	WDR54	2.52	0.007	ATF4	1.84	0.044	CMB9-22P13.1	3.79	0.001	RBMS3-AS3	-3.42	0.002
S1 POSTc RPMI US vs T0	PROM1	-6.88	0.017	FOXP2	-7.73	0.002	FAM241A	-1.91	0.036	LINC02889	-2.18	0.044
S1 POSTc RPMI US vs T0	GAS7	-6.96	0.013	IRF5	-3.57	0.009	PDZK1	-3.89	0.029	RP11-525G13.2	-2.69	0.016
S1 POSTc RPMI US vs T0	MATK	-3.55	0.013	ARHGAP22	-3.27	0.007	ADGRE1	-4.52	0.005	ANKRD20A7P	-7.91	0.001
S1 POSTc RPMI US vs T0	CDKL5	-2.18	0.02	PALLD	-4.21	0.011	PARL	-2.31	0.039	NIFK-AS1	3.95	0.011
S1 POSTc RPMI US vs T0	MGST1	-7.12	0.011	QRICH2	7.41	0.005	DDIT3	3.65	< 0.001	RP11-544A12.4	-3.89	0.029
S1 POSTc RPMI US vs T0	POMT2	2.63	0.033	FGF13	-2.5	0.024	TP53I11	4.02	0.044	CTDSPL2P1	-3.4	0.019
S1 POSTc RPMI US vs T0	NCAPD2	-3.23	0.032	SYT5	-3.89	0.029	ZNF519	-2.77	0.047	LINC01792	-4.15	0.013
S1 POSTc RPMI US vs T0	SCMH1	-4.25	0.001	MOSPD2	-3.81	0.006	RUVBL1	-2.96	0.026	LINC01358	-1.9	0.042
S1 POSTc RPMI US vs T0	MKS1	-3.35	0.009	ECSIT	-3.17	0.038	MSRA	-7.51	0.003	AL163953.3	-7.26	0.007
S1 POSTc RPMI US vs T0	PLAUR	-4.03	0.002	RTN4IP1	-3.1	0.044	BNIP3	4.03	< 0.001	RP11-554F20.1	-2.7	0.008
S1 POSTc RPMI US vs T0	TYROBP	-3.42	< 0.001	KLHDC7B	2.89	0.028	RTTN	-2.11	0.026	RP5-947P14.1	-4.56	0.004
S1 POSTc RPMI US vs T0	BRCA1	-7.26	0.007	LSM4	-2.28	0.013	WDR25	-4.21	0.011	LINC01684	-3.86	< 0.001
S1 POSTc RPMI US vs T0	MAP4K5	-4.77	0.002	ADRM1	2.2	0.038	OR5AN1	-5.44	< 0.001	WAKMAR2	-2.19	0.049
S1 POSTc RPMI US vs T0	AGPS	-2.44	0.014	LILRB2	-7.46	0.004	RMDN1	-2.89	0.033	SHISA9	-2.45	0.01
S1 POSTc RPMI US vs T0	SNAPC1	2.4	0.048	SH3BP5	-4.42	< 0.001	OR4F17	-2.39	0.034	LINC02245	-3.82	0.036
S1 POSTc RPMI US vs T0	SLAMF7	-4.37	0.007	PSME3	-2.76	0.011	BASP1	4.02	0.044	AC073130.1	-2.59	0.016
S1 POSTc RPMI US vs T0	IKZF2	-5.18	< 0.001	C1orf159	-4.15	0.013	FAM91A1	-7.26	0.007	KCNMB2-AS1	-3.28	0.003
S1 POSTc RPMI US vs T0	EIPR1	-4.42	0.006	NPHP4	4.02	0.044	TYMS	-2.53	0.044	LINC01410	-5.15	< 0.001
S1 POSTc RPMI US vs T0	CYP46A1	-3.05	0.002	STARD3	-1.92	0.044	HIC1	8.58	< 0.001	RNY4P25	-3.96	0.023
S1 POSTc RPMI US vs T0	VCAN	-2.85	0.006	CCT6B	-2.82	0.011	NAALADL2	-3.82	0.036	SNORD13	-4.35	< 0.001
S1 POSTc RPMI US vs T0	PNKP	-3.45	0.016	ENOSF1	-3.38	0.002	ZNF518A	-4.92	0.002	SNORD13P3	-4.47	0.006
S1 POSTc RPMI US vs T0	CTNS	-6.78	0.022	RAP1GAP2	-5.26	< 0.001	DMAP1	-2.83	0.018	ST3GAL6-AS1	-2.59	0.016
S1 POSTc RPMI US vs T0	INPP4A	-2.38	0.013	JCHAIN	-4.4	< 0.001	ALS2CL	-4.03	0.019	IGKV2D-30	-2.76	0.033
S1 POSTc RPMI US vs T0	PARP3	-7.63	0.003	XAF1	-1.88	0.05	ZC3H12D	2.21	0.014	IGKV1-6	-3.64	0.011
S1 POSTc RPMI US vs T0	SPATA7	-4.47	0.006	PPP1R3D	3.72	0.019	DTX3	-3.66	0.044	CTD-2643I7.5	-3.74	0.044
S1 POSTc RPMI US vs T0	CAPG	-2.04	0.044	ATP8A2	-7.12	0.011	SLC25A20	-5.54	< 0.001	IGKV3-20	-3.5	< 0.001
S1 POSTc RPMI US vs T0	TRIT1	3.4	0.018	CDK8	-6.78	0.022	ERBB4	-7.04	0.011	IGKV1D-33	-3.17	0.029
S1 POSTc RPMI US vs T0	CTPS2	-4.09	0.016	EPSTI1	-2.92	0.019	PARP10	-6.96	0.013	ZNF542P	-5.02	0.001
S1 POSTc RPMI US vs T0	HDAC9	-4.32	0.008	TBC1D8B	-2.53	0.005	HYI	-3.12	0.033	CDKN2B-AS1	-3.53	0.002
S1 POSTc RPMI US vs T0	TSPAN17	-3.89	0.029	MORC2	-4.65	0.003	LINC00670	-2.31	0.019	IGKV1-16	-4.37	0.007
S1 POSTc RPMI US vs T0	PER3	-7.68	0.002	LARGE1	-7.68	0.002	LINC00174	-3.03	0.044	MIF	2.05	0.021
S1 POSTc RPMI US vs T0	SLC4A8	-6.88	0.017	SLC2A11	-2.19	0.025	TSHZ1	7.74	0.002	IGKV1D-16	-3.73	0.008
S1 POSTc RPMI US vs T0	HERPUD1	2.06	0.025	AGAP3	2.36	0.021	SLC9A4	-3.23	0.001	SUCLG2-AS1	-2.33	0.011
S1 POSTc RPMI US vs T0	RAD51	-7.19	0.009	DYDC2	-7.82	0.002	PRF1	-3.38	< 0.001	IGKV3-11	-2.54	0.01
S1 POSTc RPMI US vs T0	KIF1B	-3.7	0.003	ELP3	-2.25	0.027	FAM83H	-7.26	0.007	LINC01192	-2.61	0.045
S1 POSTc RPMI US vs T0	ATG5	-2.74	0.017	GSTM3	2.15	0.044	OGFOD3	-3.66	0.044	ZBTB20-AS1	-7.04	0.011
S1 POSTc RPMI US vs T0	TBXAS1	-8.08	< 0.001	LDHA	2.59	0.003	ACBD4	3.45	0.005	XACT	-2.29	0.009
S1 POSTc RPMI US vs T0	GATB	-4.09	0.016	TMEM241	-2.36	0.022	FANCB	-7.78	0.002	IGKV1-9	-2.28	0.039
S1 POSTc RPMI US vs T0	CDK17	-4.03	0.003	YARS1	2.14	0.022	OR5AS1	-2.86	0.003	C8orf58	-7.19	0.009
S1 POSTc RPMI US vs T0	GNA15	3.29	0.009	CEMIP2	-2.15	0.024	MGAT4C	-3.82	0.003	CTC-340A15.2	-2.88	0.003
S1 POSTc RPMI US vs T0	LIMCH1	-7.46	0.004	ADAM19	-2.27	0.043	CREB3L2	-3.32	0.009	IGKV1-33	-3.25	0.022
S1 POSTc RPMI US vs T0	TM7SF3	-4.15	0.013	CD36	-7.04	0.011	TSEN54	-3.08	0.038	MTFP1	2.2	0.026
S1 POSTc RPMI US vs T0	TSPAN32	-4.89	0.002	HILPDA	9.84	< 0.001	UBA7	-2.83	0.006	TCP10L	-2.2	0.043
S1 POSTc RPMI US vs T0	ATP2C2	3.45	0.005	TAF5L	-2.75	0.01	FAM153B	-3.12	0.033	IGKV1-39	-3.98	< 0.001
S1 POSTc RPMI US vs T0	TMEM161A	-4.61	0.004	PLXNC1	-6.96	0.013	SYNM	4.02	0.044	LINC01206	-2.84	0.002
S1 POSTc RPMI US vs T0	CHI3L2	-4.19	0.002	NEK3	4.28	0.019	SPNS3	-3.68	0.009	CCDC169	-2.53	0.026
S1 POSTc RPMI US vs T0	IPO5	-2.21	0.045	MYO1G	-2.3	0.028	PLCB1	-4.99	0.001	RP11-716O23.2	-2.24	0.029
S1 POSTc RPMI US vs T0	WDR18	-4.96	0.001	SCN2A	-4.32	0.008	CRIP2	-4.32	0.008	LINC00882	-2.5	0.013
S1 POSTc RPMI US vs T0	ASPM	-3.66	0.044	VPS45	-3	0.026	NEB	-6.88	0.017	SOX2-OT	-2.35	0.034
S1 POSTc RPMI US vs T0	CD84	-2.53	0.019	IL1RN	-7.04	0.011	POTEC	-4.07	< 0.001	IGKV2-30	-2.65	0.042
S1 POSTc RPMI US vs T0	FGFR2	-7.04	0.011	KLF4	-7.46	0.004	BCOR	6.15	< 0.001	EFNA4	7.62	0.003
S1 POSTc RPMI US vs T0	FECH	-3.5	0.013	DDX60	-2.5	0.048	OR56A4	-3.89	< 0.001	IGKV1-5	-3.53	0.001
S1 POSTc RPMI US vs T0	IFI35	-3.92	0.004	YAP1	-7.26	0.007	HMCES	3.14	0.002	WDR86-AS1	-3.1	0.044
S1 POSTc RPMI US vs T0	PRR11	-4.32	0.008	SLC37A4	-4.15	0.013	TBK1	-2.31	0.044	LINC01322	-4.56	0.004
S1 POSTc RPMI US vs T0	ATP11A	-3.1	0.044	ALKBH8	-7.51	0.003	SDR42E2	-4.32	0.008	IGKV3-15	-2.71	0.006
S1 POSTc RPMI US vs T0	PYGM	4.02	0.044	ZNF280D	-3.1	0.018	OR1D2	-3.84	< 0.001	IGKV1-27	-3.82	0.036
S1 POSTc RPMI US vs T0	SDK2	2.48	0.036	IFI44L	-2.53	0.044	TSPYL2	2.13	0.024	HBB	-7.51	0.003
S1 POSTc RPMI US vs T0	BCL3	3.11	0.044	TACC2	-2.52	0.013	CCR10	-3.66	0.044	LINC00861	-2.33	0.01
S1 POSTc RPMI US vs T0	ABCC9	-2.7	0.004	EXOC6	-4.12	< 0.001	WDR27	3.52	0.032	RP11-10K16.1	-2.37	0.016
S1 POSTc RPMI US vs T0	CLEC2D	1.88	0.038	ATIC	-3.01	0.01	ZFP1	7.16	0.011	RP11-712B9.2	-1.87	0.044
S1 POSTc RPMI US vs T0	HDHD5	2.85	0.011	ITPRID2	-2.85	0.037	PIWIL3	-6.78	0.022	SBF2-AS1	-1.9	0.049
S1 POSTc RPMI US vs T0	PTPN3	-7.19	0.009	SCARB2	-3.66	0.007	MED12	2.68	0.017	MIR210HG	6.06	< 0.001
S1 POSTc RPMI US vs T0	SLC44A1	-4.99	0.001	SUOX	4.5	0.011	ZBTB40	-2.31	0.044	CTD-2260A17.2	-4.32	0.008
S1 POSTc RPMI US vs T0	PABPC1	1.81	0.044	BRCA2	-4.03	0.019	SATL1	-2.56	0.014	RP11-373N22.3	-2.37	0.008
S1 POSTc RPMI US vs T0	ARHGAP10	-4.21	0.011	KANSL2	2.37	0.012	MAFF	2.63	0.033	CTC-441N14.2	-4.49	< 0.001
S1 POSTc RPMI US vs T0	LIMS2	-6.96	0.013	SLAIN1	-3.66	0.044	TNFAIP2	-4.77	0.002	STX18-AS1	-2.03	0.028
S1 POSTc RPMI US vs T0	PTGS2	-3.96	0.023	RTN1	-7.04	0.011	ZNF445	-2	0.036	LINC02268	-2.19	0.024
S1 POSTc RPMI US vs T0	FRY	-8.36	< 0.001	SLC24A4	-6.78	0.022	KLHL33	-3.02	0.002	LINC00504	-2.05	0.022
S1 POSTc RPMI US vs T0	EED	1.85	0.05	DNAJA4	7.33	0.006	METTL7A	-5.63	< 0.001	RP11-553P9.2	-3.1	0.044
S1 POSTc RPMI US vs T0	ENO1	2.76	0.002	BBS4	-2.24	0.045	SHC4	-2.47	0.039	RP5-1000K24.2	-2.25	0.044
S1 POSTc RPMI US vs T0	TXK	-2.33	0.036	NTRK3	-4.37	0.007	DNAH14	-4.15	0.013	C8orf34-AS1	-2.35	0.034
S1 POSTc RPMI US vs T0	ICAM3	-1.94	0.047	FURIN	3.02	0.003	SETD4	-3.1	0.044	FMN1	-4.15	0.013
S1 POSTc RPMI US vs T0	DNAJC10	-2.01	0.027	ITGAX	-7.04	0.011	NKAIN3	-2.51	0.006	RP11-317M11.1	-6.88	0.017
S1 POSTc RPMI US vs T0	SYNJ2	-5.02	0.001	MYLK3	-2.61	0.015	TMLHE	-4.09	0.016	UGDH-AS1	-2.43	0.008
S1 POSTc RPMI US vs T0	RBFOX1	-6.78	0.022	MEAK7	3.15	0.012	GSAP	-3.89	0.029	LINC02503	-2.98	0.002
S1 POSTc RPMI US vs T0	RUNX1T1	-7.87	0.001	IRF8	-3.34	0.022	EDARADD	7.07	0.013	LINC02465	-6.88	0.017
S1 POSTc RPMI US vs T0	FKBP7	-7.78	0.002	BCAS3	-5.65	< 0.001	MRTFB	-2.9	0.007	OR7E94P	-2.57	0.013
S1 POSTc RPMI US vs T0	OPHN1	-1.98	0.03	ASXL3	-7.4	0.005	ANKRD37	2.5	0.026	RP11-346J10.1	-7.4	0.005
S1 POSTc RPMI US vs T0	PGM1	3.81	0.003	FBXO15	-3.3	0.001	LINC00643	-4.15	0.013	LINC02742	-2.5	0.036
S1 POSTc RPMI US vs T0	KEAP1	-3.66	0.044	PRDM15	4.15	0.005	OR10H1	-2.96	0.026	RP11-381K20.2	-2.08	0.037
S1 POSTc RPMI US vs T0	SLC4A4	-7.78	0.002	PFKL	-3.51	0.005	LILRB4	-3.89	0.005	LINC02762	-8.04	< 0.001
S1 POSTc RPMI US vs T0	CPOX	2.3	0.042	SCYL1	8.55	< 0.001	ZNF395	1.93	0.044	RP11-4O3.1	-2.89	0.015
S1 POSTc RPMI US vs T0	AP4E1	-2.85	0.037	ADAMTS10	-7.04	0.011	RHD	2.86	0.008	LINC00989	-7.46	0.004
S1 POSTc RPMI US vs T0	MEF2C	-8.7	< 0.001	NLRP12	-7.26	0.007	GPR141	-3.68	0.009	LINC01182	-7.46	0.004
S1 POSTc RPMI US vs T0	ZMPSTE24	-4.69	0.003	CARM1	-4.03	0.019	SHTN1	-6.78	0.022	RP11-582J16.4	-2.32	0.013
S1 POSTc RPMI US vs T0	SLCO1A2	-2.96	0.026	ARHGEF19	-3.74	0.044	MAGI2	-2.31	0.049	CTD-2035E11.3	-3.29	0.019
S1 POSTc RPMI US vs T0	FCN1	-5.61	< 0.001	PLK4	-7.51	0.003	OR6C75	-3.12	0.002	RP11-37B2.1	-2.77	0.003
S1 POSTc RPMI US vs T0	PILRA	-7.33	0.006	C1orf162	-2.66	0.008	RP11-43F13.1	-7.46	0.004	RP11-281P23.1	-2.19	0.026
S1 POSTc RPMI US vs T0	USP40	-7.68	0.002	GPR161	-6.78	0.022	ARL4C	-2.06	0.021	LINC02475	-7.4	0.005
S1 POSTc RPMI US vs T0	IPO11	-4.21	0.011	NUF2	-3.17	0.038	ZNF793	-4.77	0.002	IGKV1D-39	-3.98	< 0.001
S1 POSTc RPMI US vs T0	FOLH1	-6.78	0.022	FCRL5	-2.59	0.018	CIBAR1	-6.96	0.013	RNA5-8SP6	-3.47	0.004
S1 POSTc RPMI US vs T0	SNX10	-8.23	< 0.001	INTS7	-7.51	0.003	ZP3	-3.1	0.044	RNY4	-2.53	0.044
S1 POSTc RPMI US vs T0	NOX4	-7.12	0.011	TAF1A	-6.88	0.017	HBA2	-8.08	< 0.001	LINC01609	-2.29	0.015
S1 POSTc RPMI US vs T0	L2HGDH	-2.81	0.004	SUSD4	-6.78	0.022	OR2G6	-2.68	0.009	RP11-566H8.3	-2.94	0.013
S1 POSTc RPMI US vs T0	KLHL42	-7.51	0.003	ATP8B2	-3.08	0.003	CFAP54	-1.92	0.039	PCAT1	-4.09	0.016
S1 POSTc RPMI US vs T0	CASS4	-2.55	0.024	RAB13	2.72	0.026	DPYD	-8.54	< 0.001	RP11-473J6.1	-2.92	0.006
S1 POSTc RPMI US vs T0	SULT2B1	4.57	0.01	S100A8	-6.3	< 0.001	UROS	-2.5	0.029	IGHGP	-3.17	0.038
S1 POSTc RPMI US vs T0	P2RX7	-3.82	0.036	PSEN2	-2.88	0.003	FSIP2	-2.81	0.005	LINC01608	-2.16	0.017
S1 POSTc RPMI US vs T0	OAS1	-2.2	0.013	PPFIA4	9.13	< 0.001	RELN	-8	< 0.001	RP11-61L23.2	3.45	< 0.001
S1 POSTc RPMI US vs T0	ARHGAP4	-2.17	0.018	TMEM177	4.02	0.044	TSPYL1	-2.16	0.047	RP11-17A4.2	-2.83	0.003
S1 POSTc RPMI US vs T0	GPATCH2L	-2.95	0.017	SCN1A	-7.87	0.001	ZKSCAN3	-2.33	0.014	AP000662.4	-7.51	0.003
S1 POSTc RPMI US vs T0	LTBP4	-2.69	0.026	SLC4A10	-7.91	0.001	USP32P3	-2.22	0.019	LINC02682	-4.03	0.019
S1 POSTc RPMI US vs T0	ICAM1	2.95	0.024	UNC80	-2.28	0.039	IL1RAP	-3.33	0.017	IGLL5	-2.94	0.001
S1 POSTc RPMI US vs T0	LYZ	-4.63	< 0.001	RBMS3	-3.96	0.004	CCDC189	-6.96	0.013	CTD-2184C24.2	-2.44	0.044
S1 POSTc RPMI US vs T0	FLT3LG	-1.83	0.047	SHQ1	-3.96	0.023	ZNF79	-6.78	0.022	RP11-805J14.5	4.43	0.013
S1 POSTc RPMI US vs T0	CERS4	-4.09	0.016	LPP	-2.2	0.014	S100A4	-2.3	0.009	FAM66D	-4.32	0.008
S1 POSTc RPMI US vs T0	NRCAM	-6.78	0.022	MARCHF1	-4.42	0.006	PLEKHG4	-3.74	0.044	STX17-AS1	-2.03	0.034
S1 POSTc RPMI US vs T0	LAMB1	-3.96	0.023	SRD5A1	-2.5	0.008	COLCA1	-2.26	0.019	MIR100HG	-1.94	0.049
S1 POSTc RPMI US vs T0	ITGA6	-2.15	0.035	OTULINL	-3.89	0.029	ZNF471	-2.07	0.037	CCND2-AS1	-6.96	0.013
S1 POSTc RPMI US vs T0	G2E3	-4.05	0.002	PAM	2.41	0.019	SUPT3H	-2.2	0.029	CTSO	-3.31	0.003
S1 POSTc RPMI US vs T0	CDC45	-6.96	0.013	FBXL17	-7.19	0.009	POM121	2.05	0.022	COA8	1.95	0.046
S1 POSTc RPMI US vs T0	ADA2	-2.33	0.013	ARHGAP26	-1.99	0.034	AFAP1	-4.15	0.013	LINC00507	-2.14	0.023
S1 POSTc RPMI US vs T0	WHRN	2.67	0.023	KLHL3	-8.12	< 0.001	SULF2	-4.27	0.01	ZNF10	-3.96	0.023
S1 POSTc RPMI US vs T0	CREM	2.76	0.003	SCML4	-1.94	0.044	TCF4	-2.6	0.021	RP11-1143G9.4	-5.17	< 0.001
S1 POSTc RPMI US vs T0	IL12RB1	-2.88	0.011	SLC18B1	-7.26	0.007	TRPV1	-4.92	0.002	LINC00485	-2.49	0.022
S1 POSTc RPMI US vs T0	ACOT7	-7.73	0.002	GNA12	-7.57	0.003	VKORC1L1	-6.78	0.022	RP11-111A21.1	-2.19	0.036
S1 POSTc RPMI US vs T0	PCSK5	-2.43	0.017	NCAPG2	-4.25	0.002	DAPK1	-7.46	0.004	LINC02328	-2.85	0.037
S1 POSTc RPMI US vs T0	NRP1	-4.61	0.004	PRPS1	-3.12	0.033	ARID5A	2.14	0.031	LINC02301	-3.6	< 0.001
S1 POSTc RPMI US vs T0	IZUMO4	7.41	0.005	DOCK5	-3.17	0.038	KPNA5	-2.23	0.013	RP11-80A15.1	-6.88	0.017
S1 POSTc RPMI US vs T0	CECR2	-6.78	0.022	AK3	-7.68	0.002	SCOC-AS1	-3.28	0.026	FPGT-TNNI3K	-6.88	0.017
S1 POSTc RPMI US vs T0	LRP5L	7.16	0.011	AOPEP	-3.82	0.036	IGF2R	-2	0.027	LINC00648	-6.96	0.013
S1 POSTc RPMI US vs T0	LGALS2	-7.19	0.009	ASTN2	-2.15	0.033	GAL3ST4	-7.51	0.003	RP11-346D14.1	-2.76	0.002
S1 POSTc RPMI US vs T0	TPTEP1	-2.65	0.01	RSU1	-2.12	0.034	ZNF257	-4.15	0.013	ST20-AS1	-3.45	0.016
S1 POSTc RPMI US vs T0	KCTD17	7.55	0.003	RGR	-2.8	0.011	ADAM32	-2.3	0.011	LINC02254	-1.97	0.037
S1 POSTc RPMI US vs T0	SDR39U1	-2.02	0.042	FUOM	-3.74	0.044	SERPINA1	-10.2	< 0.001	IQCH-AS1	-4.56	0.004
S1 POSTc RPMI US vs T0	CDKN3	-4.03	0.019	HYOU1	2.1	0.029	BLM	-7.26	0.007	RP5-1024G6.7	-3.69	0.006
S1 POSTc RPMI US vs T0	ZFYVE21	-7.04	0.011	KAT14	-5.73	< 0.001	BNIP3P1	4.6	< 0.001	PWRN1	-7.68	0.002
S1 POSTc RPMI US vs T0	PCNX1	-2.22	0.026	CHEK1	-3.23	0.032	ADARB1	-2.33	0.023	MIR762HG	-2.67	0.013
S1 POSTc RPMI US vs T0	RPS6KA5	-2.54	0.011	TM7SF2	-3.82	0.036	PIGN	-2.95	0.001	AQP4-AS1	-4.15	0.013
S1 POSTc RPMI US vs T0	ZMYND8	-2.06	0.036	ALDOA	2.07	0.019	PSAP	-2.21	0.013	RP11-410C4.5	-3.22	0.008
S1 POSTc RPMI US vs T0	RAB5IF	-4.96	0.001	KIAA1328	-3.4	< 0.001	MDS2	-3.36	0.015	ERVK13-1	-2.99	0.05
S1 POSTc RPMI US vs T0	SAMHD1	-2.38	0.008	DLG2	-3.66	0.044	NKIRAS1	4.13	0.001	HERC2P5	-2.81	0.004
S1 POSTc RPMI US vs T0	CST3	-6.37	< 0.001	ITPR1	-3.68	0.003	PLCG2	-3.8	0.036	BBS7-DT	-2.93	0.003
S1 POSTc RPMI US vs T0	DHX35	-4.61	0.004	CACNA1C	-6.88	0.017	ZNF71	-3.74	0.044	HERC2P8	-2.71	0.005
S1 POSTc RPMI US vs T0	CELF4	-6.88	0.017	OXSM	2.48	0.047	ZNF273	-3.28	0.026	LINC02605	-3.47	0.004
S1 POSTc RPMI US vs T0	NOL4	-7.57	0.003	C12orf45	-2.32	0.009	SLC29A3	-4.52	0.005	RP11-96K19.4	-2.72	0.003
S1 POSTc RPMI US vs T0	STS	-2.41	0.025	MIPOL1	-2.39	0.008	PHETA1	-6.78	0.022	LINC00662	-2.68	0.003
S1 POSTc RPMI US vs T0	PRPS2	-3.96	0.023	FER	-2.5	0.012	FLVCR1-DT	-3.74	0.044	RP11-691G17.1	-2.9	0.003
S1 POSTc RPMI US vs T0	MCF2	-3.74	0.044	ANKAR	-2.37	0.044	TOGARAM1	-3.89	0.029	CORO7	-2.46	0.029
S1 POSTc RPMI US vs T0	SLC25A14	-7.04	0.011	MFSD6	-4.21	0.011	GK	3.85	0.002	LINC00621	-2.04	0.044
S1 POSTc RPMI US vs T0	PGK1	2.44	0.006	BICD1	-3.66	0.044	RYR3	-7.4	0.005	ENSG00000263963	2.21	0.025
S1 POSTc RPMI US vs T0	MAGT1	-2.63	0.021	CCDC122	-2.02	0.031	R3HDM4	1.95	0.033	L3MBTL4-AS1	-2.5	0.024
S1 POSTc RPMI US vs T0	FNDC3A	-2.68	0.042	DST	-4.85	0.002	GRK5	4.63	0.008	TWSG1-DT	-2.18	0.023
S1 POSTc RPMI US vs T0	SUPT20H	-2.5	0.011	KCNE4	-3.68	0.003	RNU5F-1	-6.96	0.013	RP11-192H23.5	4.06	0.007
S1 POSTc RPMI US vs T0	DHRS12	-4.21	0.011	SETBP1	-7.4	0.005	INF2	-2.89	0.022	TXNIP	-3.07	< 0.001
S1 POSTc RPMI US vs T0	CLN5	-1.91	0.039	HOMER1	-3.66	0.044	OR2L2	-2.18	0.025	RP11-476K15.1	-2.49	0.022
S1 POSTc RPMI US vs T0	CCL22	9.72	< 0.001	SUV39H2	-3.66	0.044	TCP10L3	-4.52	0.005	MYO15B	-3.44	0.013
S1 POSTc RPMI US vs T0	PARD6A	7.07	0.013	RBMS1	-1.98	0.035	C6orf99	-3.96	0.023	RP11-242D8.1	-1.94	0.044
S1 POSTc RPMI US vs T0	VAC14	-3.66	0.044	SCN3A	-6.96	0.013	PRDX6-AS1	-4.69	0.003	UXT-AS1	-3.74	0.044
S1 POSTc RPMI US vs T0	COG4	-2.83	0.006	ASAP1	-3.38	0.008	FCGR3A	-5.26	< 0.001	CTC-459F4.3	-2.72	0.024
S1 POSTc RPMI US vs T0	NAGPA	4.63	0.008	CEBPG	2.44	0.044	LIME1	-3.26	0.011	LIN37	4.5	0.011
S1 POSTc RPMI US vs T0	LMF1	-6.88	0.017	ROBO3	-7.4	0.005	RTL8A	2.68	0.029	AC005614.3	-2.71	0.004
S1 POSTc RPMI US vs T0	SLC7A5	3.11	0.044	ABCA9	-2.07	0.044	RUFY2	-2.5	0.036	RP11-370I10.12	-2.8	0.002
S1 POSTc RPMI US vs T0	MEFV	-3.82	0.036	ABCA6	-3.66	0.044	ZDBF2	5.57	< 0.001	RP11-13J10.1	-2.1	0.026
S1 POSTc RPMI US vs T0	BCKDK	5.32	0.001	OBSCN	-4.21	0.011	PFDN6	-2.68	0.012	KCNQ1OT1	-2.4	0.007
S1 POSTc RPMI US vs T0	TTC23	-6.96	0.013	CNTNAP3B	-2.53	0.044	SPIN3	-3	0.006	IGHV3-30	-3.14	0.001
S1 POSTc RPMI US vs T0	ATP8B4	-7.91	0.001	PSMA8	-6.78	0.022	LAYN	7.62	0.003	LPP-AS2	-3.82	0.036
S1 POSTc RPMI US vs T0	BLOC1S6	-1.85	0.045	TSEN2	-2.67	0.017	SNHG32	1.81	0.044	DCTN6-DT	-2.15	0.033
S1 POSTc RPMI US vs T0	GDAP1	-2.22	0.022	CCDC174	1.87	0.047	HSPA1B	3.69	0.009	TAGAP-AS1	-2.99	0.002
S1 POSTc RPMI US vs T0	NDRG1	2.41	0.008	CCDC144B	-1.96	0.037	HSPA1A	3.13	0.008	RP11-423P10.2	-2.35	0.029
S1 POSTc RPMI US vs T0	NCALD	-7.4	0.005	SLC7A7	-3.82	0.036	GPANK1	2.1	0.025	POM121C	2.1	0.02
S1 POSTc RPMI US vs T0	KLHDC4	-3.15	0.004	CARNMT1	-4.61	0.004	LST1	-2.82	0.003	SAP30-DT	2.54	0.011
S1 POSTc RPMI US vs T0	BNIP3L	3.1	< 0.001	ADAMTSL3	-3.34	< 0.001	HLA-J	2.01	0.044	RP11-517H2.6	-3.89	0.005
S1 POSTc RPMI US vs T0	TULP2	-2.22	0.029	TIAM1	-2.28	0.026	OR14J1	-2.65	0.005	FAM106A	-2.37	0.044
S1 POSTc RPMI US vs T0	GYS1	7.48	0.004	BRPF1	-5.47	< 0.001	TCTN1	-2.14	0.03	RP11-50D16.4	-2.42	0.015
S1 POSTc RPMI US vs T0	FCGRT	-3.89	0.005	NRG1	-6.78	0.022	ZBTB10	-7.26	0.007	LINC02334	-3.03	0.007
S1 POSTc RPMI US vs T0	TRMT1	-5.37	< 0.001	KCNJ15	-2.36	0.011	FAM230H	-2.46	0.023	ZNF658	-6.96	0.013
S1 POSTc RPMI US vs T0	DMPK	-3.28	0.026	TSPAN18	-4.32	0.008	GYG2P1	-8.08	< 0.001	TPTE	-7.04	0.011
S1 POSTc RPMI US vs T0	LILRB1	-4.09	0.016	PALM2AKAP2	-4.03	0.003	HBA1	-4.92	0.002	U2	-3.17	0.038
S1 POSTc RPMI US vs T0	URI1	-2.44	0.025	CUL4B	-1.85	0.044	DUXAP8	-7.04	0.011	LINC02371	-7.19	0.009
S1 POSTc RPMI US vs T0	GPI	3.67	< 0.001	FAM86C1P	-3.82	0.036	RNVU1-30	-4.03	0.019	LINC01297	-4.73	0.003
S1 POSTc RPMI US vs T0	FZR1	2.3	0.029	DMTN	-7.46	0.004	MT-TV	4.09	< 0.001	U2	-3.17	0.038
S1 POSTc RPMI US vs T0	BBC3	5.43	< 0.001	ADAMTS4	-3.32	0.006	GNRHR2	-3.68	< 0.001	RNA5-8SN3	-2.83	0.002
S1 POSTc RPMI US vs T0	NKG7	-1.91	0.046	FCER1G	-5.32	< 0.001	IGKC	-3.22	< 0.001	LINC00547	-3.6	0.008
S1 POSTc RPMI US vs T0	TYK2	-2.26	0.019	HK2	3.49	0.004	IGKV4-1	-3.73	0.001	U2	-3.17	0.038
S1 POSTc RPMI US vs T0	ARRDC2	2.84	0.002	ADGRG5	-3.74	0.044	IGKV3D-20	-3.35	0.001	TUBGCP5	-3.82	0.036
S1 POSTc RPMI US vs T0	RUNDC3B	-4.15	0.013	TCAF2P1	3.33	0.003	IGKV3D-11	-2.68	0.01	CH17-373J23.1	-4.47	0.006
S1 POSTc RPMI US vs T0	CDK6	-2.13	0.044	ATAD3B	-6.88	0.017	IGLV4-69	-2.53	0.033	U2	-3.1	0.044
S1 POSTc RPMI US vs T0	LMBR1	-3.66	0.044	ZNF66	-1.89	0.047	IGLV8-61	-3.57	0.009	RP11-146E13.4	-3.48	0.001
S1 POSTc RPMI US vs T0	CPVL	-9.29	< 0.001	C21orf58	-3.28	0.026	IGLV6-57	-4.96	< 0.001	SPANXA2-OT1	-1.87	0.049
S1 POSTc RPMI US vs T0	IMPDH1	2.88	0.015	CD3G	-1.88	0.039	IGLV1-51	-2.61	0.017	5_8S_rRNA	-2.82	0.002
S1 POSTc RPMI US vs T0	MEST	-4.64	0.004	LMNA	-3.49	0.003	IGLV1-50	-3.81	0.006	U2	-3.68	0.044
S1 POSTc RPMI US vs T0	TMEM176B	-9.13	< 0.001	PPP1R35	-4.52	0.005	IGLV1-47	-4.71	< 0.001	GLIDR	-3.74	0.044
S1 POSTc RPMI US vs T0	TBL2	4.75	0.006	MGAT4B	-7.12	0.011	IGLV5-45	-7.73	0.002	RNA5-8SN1	-2.83	0.002
S1 POSTc RPMI US vs T0	FKTN	-3.08	0.038	MFSD12	-3.4	0.015	IGLV1-44	-5.01	< 0.001	IGLV2-8	-2.36	0.012
S1 POSTc RPMI US vs T0	TGFBR1	-7.91	0.001	PLXDC1	-7.12	0.011	IGLV1-40	-3.33	0.002	RNA5-8SN2	-2.83	0.002
S1 POSTc RPMI US vs T0	TESK1	4.28	0.019	ZNF577	-3.66	0.002	IGLV1-36	-3.07	0.021	GRAMD4P3	-2.53	0.044
S1 POSTc RPMI US vs T0	MPDZ	-7.19	0.009	TAMALIN	-7.04	0.011	IGLV2-23	-2.46	0.008	POTEB3	-7.26	0.007
S1 POSTc RPMI US vs T0	NPDC1	-9.22	< 0.001	TNFSF13	-6.78	0.022	IGLV2-14	-1.84	0.044	ACACA	-4.89	0.002
S1 POSTc RPMI US vs T0	ABCA2	-7.91	0.001	SLC25A45	-2.79	0.005	IGLV2-11	-2.49	0.022	U2	-3.17	0.038
S1 POSTc RPMI US vs T0	DVL1	4.02	0.044	RPS6KA4	-3.74	0.044	IGLV3-10	-3.5	0.011	IGKV1D-12	-4.37	0.007
S1 POSTc RPMI US vs T0	NSMCE4A	-2.97	0.009	TPCN2	-3.74	0.044	IGLV3-1	-2.31	0.039	CTC-448F2.7	-3.12	0.033
S1 POSTc RPMI US vs T0	PLEKHA1	-2.28	0.015	AK4	3	0.011	IGLC1	-2.87	0.002	RP11-67H24.3	-6.78	0.022
S1 POSTc RPMI US vs T0	VSIR	-2.65	0.011	NEXN	-3.82	0.036	IGLC2	-2.37	0.008	CH507-513H4.1	-3.05	0.007
S1 POSTc RPMI US vs T0	NPM3	-4.27	0.01	GBP2	2.08	0.025	IGLC3	-2.34	0.008	CTD-2144E22.9	-8.26	< 0.001
S1 POSTc RPMI US vs T0	RGS9	-6.96	0.013	SLAMF6	-2.42	0.038	IGHG4	-2.77	0.008	RP11-159D12.8	-3.66	0.044
S1 POSTc RPMI US vs T0	ABI3	-3.66	0.044	FCGR3B	-7.4	0.005	IGHG2	-3.11	< 0.001	CH17-264L24.1	-2.41	0.032
S1 POSTc RPMI US vs T0	MRPL27	-3.82	0.002	ATF3	-3.66	0.044	IGHG1	-2.7	0.003	RP11-382B18.1	-2.35	0.01
S1 POSTc RPMI US vs T0	FAM20A	4.69	0.007	DISC1	-3.33	0.017	IGHG3	-2.67	0.004	CTD-3014M21.1	-4.47	0.006
S1 POSTc RPMI US vs T0	TMEM104	-3.74	0.044	TYW5	-2.13	0.037	IGHM	-4.26	< 0.001	AP000432.3	-3.19	0.001
S1 POSTc RPMI US vs T0	ALDOC	3.17	< 0.001	SMARCAD1	-2.82	0.026	IGHV1-2	-2.65	0.042	RP11-609N14.4	-2.94	0.003
S1 POSTc RPMI US vs T0	MAPK10	-2.19	0.016	CTSS	-3.3	< 0.001	IGHV1-3	-6.88	0.017	RP11-70L8.5	-4.73	0.003
S1 POSTc RPMI US vs T0	INPP4B	-3.86	< 0.001	DHX57	-3	0.026	IGHV2-5	-3.4	0.008	CTA-212A2.2	-4.15	0.013
S1 POSTc RPMI US vs T0	BST1	-7.12	0.011	S100A9	-10.07	< 0.001	IGHV3-7	-5.94	< 0.001	RP11-624A21.1	-2.37	0.009
S1 POSTc RPMI US vs T0	SNX25	-3.66	0.044	S100A12	-7.19	0.009	IGHV3-11	-3.65	0.003	RP11-334E15.1	-2.44	0.018
S1 POSTc RPMI US vs T0	MS4A6A	-5.23	< 0.001	EIF4E3	-2.05	0.037	IGHV3-15	-4.61	0.004	XXbac-BPG283O16.9	-2.55	0.012
S1 POSTc RPMI US vs T0	CPT1A	-2.59	0.014	FCRL1	-7.87	0.001	IGHV3-21	-3.96	0.003	RP3-466P17.3	-2.43	0.023
S1 POSTc RPMI US vs T0	BIN2	-2.54	0.005	C4orf36	-2.24	0.033	IGHV3-23	-2.99	0.003	LA16c-60D12.1	-2.94	0.005
S1 POSTc RPMI US vs T0	IL23A	2.69	0.033	PLSCR2	-7.12	0.011	IGHV4-28	-4.47	0.006	RP11-438L7.1	-2.12	0.031
S1 POSTc RPMI US vs T0	GLI1	7.07	0.013	KIF15	-7.12	0.011	IGHV3-33	-3.33	< 0.001	IGHV1-69D	-4.09	0.016
S1 POSTc RPMI US vs T0	MAGOHB	2.31	0.018	NMNAT3	-2.41	0.007	IGHV4-34	-6.96	0.013	CH507-528H12.1	-2.8	0.005
S1 POSTc RPMI US vs T0	CDK2AP1	-2.85	0.007	SENP2	-3.07	0.021	IGHV4-39	-3.46	0.006	EIF1B-AS1	-2.04	0.026
S1 POSTc RPMI US vs T0	OAS3	-2.5	0.036	INTU	-2.35	0.009	IGHV1-46	-8	< 0.001	GHET1	-2.85	0.006
S1 POSTc RPMI US vs T0	GTF2H3	-3.53	0.005	MAP9	-4.42	0.006	IGHV3-48	-4.25	0.002	HELLPAR	-2.17	0.013
S1 POSTc RPMI US vs T0	GAPDH	2.67	0.003	ADGRV1	-3.09	0.012	IGHV5-51	-2.89	0.033	ARRDC3-AS1	-2.07	0.033
S1 POSTc RPMI US vs T0	TPI1	3.1	< 0.001	PI16	-8.7	< 0.001	IGHV4-61	-3.56	0.005	LINC00506	-2.52	0.006
S1 POSTc RPMI US vs T0	SPSB2	3.05	0.016	MIOS	-3.89	0.029	IGHV1-69	-4.15	0.013	SEPSECS-AS1	-2.37	0.009
S1 POSTc RPMI US vs T0	ENO2	2.3	0.01	KCNV1	-2.57	0.015	SFT2D2	-1.88	0.045	LINC00891	-2.57	0.008
S1 POSTc RPMI US vs T0	SRSF9	-2.28	0.023	CSMD3	-7.82	0.002	LPAL2	-2.79	0.007	IGHV3-69-1	-7.12	0.011
S1 POSTc RPMI US vs T0	FRK	-2.71	0.003	NOS3	-6.78	0.022	RP11-306O13.1	-3.02	0.003	RP5-912I13.2	-2.87	0.007
S1 POSTc RPMI US vs T0	NEDD9	-3.4	0.019	SLC4A2	-6.88	0.017	GSTM2	-2.11	0.047	TCAF2C	3.81	0.003
S1 POSTc RPMI US vs T0	PTP4A1	-2.02	0.035	PDP1	-3.1	0.018	ARHGAP19	-4.21	0.011	RP11-298A10.3	3.54	< 0.001
S1 POSTc RPMI US vs T0	VNN2	-4.96	0.001	TMEM67	-7.4	0.005	HAUS7	-3.45	0.004	RP11-57A19.7	-3.14	0.016
S1 POSTc RPMI US vs T0	CCR6	-3.69	< 0.001	SYK	-7.87	0.001	LCAT	4.2	0.023	RP11-419I17.1	-2.06	0.025
S1 POSTc RPMI US vs T0	QKI	-3.33	0.004	RASEF	-3.32	0.006	NCKIPSD	4.28	0.019	RP11-470M1.2	-2.25	0.044
S1 POSTc RPMI US vs T0	CCND3	-2.6	0.003	MELK	-6.96	0.013	RPL17P50	3.05	0.016	RP11-379B18.8	-3.24	0.001
S1 POSTc RPMI US vs T0	VEGFA	2.51	0.013	FAAH2	2.4	0.048	MRPL23	-5.29	< 0.001	XXbac-BPG171B11.8	-3.13	0.005
S1 POSTc RPMI US vs T0	LAMA4	-3.36	0.005	ENTR1	-2.28	0.023	TSPAN4	-7.04	0.011	RP11-331G2.8	-2.78	0.022
S1 POSTc RPMI US vs T0	NNT	-1.94	0.038	BORCS5	-2.77	0.047	ARL16	-2.34	0.016	CCDC39	-4.56	0.004
S1 POSTc RPMI US vs T0	HMGCR	-2.57	0.011	C12orf50	-2.66	0.004	SH3D21	3.02	0.013	RP11-114N19.3	-2.07	0.023
S1 POSTc RPMI US vs T0	HAVCR1	-6.78	0.022	HSPA12A	-2.81	0.043	SCART1	-7.26	0.007	RP11-281A20.2	-7.19	0.009
S1 POSTc RPMI US vs T0	GABRG2	-3.33	< 0.001	TTC7B	-3.25	0.022	LINC01588	-3.34	0.006	CTD-2515O10.6	2.08	0.019
S1 POSTc RPMI US vs T0	TRAPPC13	-3.59	0.012	AGBL2	-7.04	0.011	COL28A1	-3.13	0.002	RP11-397E7.6	-1.97	0.047
S1 POSTc RPMI US vs T0	MACROH2A1	-2.15	0.035	CACNB2	-2.72	0.01	OR7E122P	-3.17	0.029	RP11-826N14.7	-3.1	0.044
S1 POSTc RPMI US vs T0	SMAD5	-7.19	0.009	TAF1D	2.09	0.018	LINC02649	4.2	0.005	LINC00941	-3.75	0.005
S1 POSTc RPMI US vs T0	CPEB4	-2.43	0.029	IKBIP	3.52	0.032	RP11-43F13.3	-3.23	0.032	XXbac-BPG254B15.11	3.37	0.044
S1 POSTc RPMI US vs T0	HRH2	-3.34	0.022	POLL	2.88	0.009	NPEPL1	-2.9	0.006	RP11-19D22.1	-2.26	0.022
S1 POSTc RPMI US vs T0	ARL6	-6.78	0.022	CUL5	-2.34	0.044	TNFRSF25	-1.91	0.041	RP11-172F7.1	-2.14	0.035
S1 POSTc RPMI US vs T0	FAM162A	2.8	0.003	IFTAP	-2.46	0.007	CYB5RL	-4.13	0.002	RP11-139D23.7	-2.61	0.045
S1 POSTc RPMI US vs T0	PFKFB4	4	0.002	ATP9B	-2.02	0.028	MIF-AS1	2.19	0.015	RP11-395N17.3	-2.53	0.044
S1 POSTc RPMI US vs T0	C3orf14	-3.66	0.044	CENPV	-3.89	0.029	FAM228B	-2.89	0.002	RP11-105G5.2	-6.78	0.022
S1 POSTc RPMI US vs T0	DNAH1	-2.53	0.044	PCLAF	-3.66	0.007	XKR9	-3.81	< 0.001	RP11-661D17.1	-2.33	0.036
S1 POSTc RPMI US vs T0	TTL	-2.55	0.021	ATP23	-2.66	0.005	FAM185A	-4.21	0.011	RP11-314A5.7	-2.68	0.042
S1 POSTc RPMI US vs T0	CCL20	7.16	0.011	MTMR10	-3.64	0.011	LINC02068	-6.88	0.017	CTD-2143A15.1	-2.2	0.036
S1 POSTc RPMI US vs T0	EPB41L5	-3.66	0.044	MS4A7	-6.78	0.022	RP11-33A14.1	-3.82	0.036	RP11-640I2.2	-3.08	0.003
S1 POSTc RPMI US vs T0	MOGS	-2.72	0.037	DIS3L	-3.82	0.036	RP5-1180C18.1	-2.26	0.025	CERNA2	-3.82	0.036
S1 POSTc RPMI US vs T0	DOK1	-3.82	0.036	PBX3	-3.66	0.044	IGKV3D-15	-2.78	0.005	LINC02822	-3.31	< 0.001
S1 POSTc RPMI US vs T0	POLE4	-2.31	0.033	NOD2	-3.96	0.023	SLC44A3-AS1	-3.64	0.011	CH507-528H12.10	-5.18	< 0.001
S1 POSTc RPMI US vs T0	DNAH6	-3.74	0.044	DPEP2	-2.33	0.031	DNAJC27-AS1	3.37	0.044	RP11-686F15.4	-4.96	0.001
S1 POSTc RPMI US vs T0	EHBP1	-3.21	0.025	POP5	-2.39	0.034	IGHV4-59	-3.38	0.008	RP11-622O11.6	-2.28	0.016
S1 POSTc RPMI US vs T0	IL1RL1	-3.96	0.023	UBXN6	-7.19	0.009	PRKAR2A-AS1	-6.88	0.017	AC006115.7	-2.11	0.022
S1 POSTc RPMI US vs T0	STK16	-4.61	0.004	WDR81	-7.13	0.011	LINC00539	-6.96	0.013	CH507-528H12.12	-5.09	< 0.001
S1 POSTc RPMI US vs T0	DCAF17	-3.17	0.038	CDK2AP2	2.88	0.003	LINC01886	-6.78	0.022	AC003099.2	-2.39	0.007
S1 POSTc RPMI US vs T0	KYNU	-1.87	0.048	TMC8	-1.83	0.047	RP11-153F1.1	-6.88	0.017	CH507-528H12.3	-7.4	0.005
S1 POSTc RPMI US vs T0	ORC4	-2.69	0.003	FAM234A	2.8	0.021	RTCA-AS1	-1.98	0.029	CH507-513H4.7	-7.4	0.005
S1 POSTc RPMI US vs T0	ELAPOR1	-4.56	0.004	ULK4	-3.85	0.005	IGHV3-74	-4.69	0.003	AC007666.5	-2.2	0.043
S1 POSTc RPMI US vs T0	MECR	-4.27	0.01	CCDC88B	-2.3	0.022	RASAL2-AS1	-1.94	0.048	CH507-513H4.10	-5.23	< 0.001
S1 POSTc RPMI US vs T0	DOCK7	-3.85	0.005	RNF187	2.34	0.044	RP11-538D16.2	-2.66	0.006	CH507-528H12.4	-7.4	0.005
S1 POSTc RPMI US vs T0	CFHR3	-6.78	0.022	RAB31	-7.96	0.001	POT1-AS1	-2.51	0.017	RP11-510D4.1	-2.13	0.029
S1 POSTc RPMI US vs T0	CRYZ	-4.73	0.003	ZNF30	4.5	0.011	XXbac-BPG55C20.7	-9.49	< 0.001	CTB-53D8.2	-2.94	0.003
S1 POSTc RPMI US vs T0	SLC2A1	1.97	0.044	ZNF507	-4.65	0.003	LINC01821	-3.12	0.033	RP11-454P7.5	-3.15	0.001
S1 POSTc RPMI US vs T0	PTCH2	-6.96	0.013	TMEM150A	3.23	0.033	SLC26A6	4.28	0.019	RP11-512C24.4	-4.09	0.016
S1 POSTc RPMI US vs T0	ABCD3	-8.26	< 0.001	OR10G3	-2.78	0.012	PTPRD-AS1	-2.89	0.033	RP11-2G16.1	-2.31	0.044
S1 POSTc RPMI US vs T0	RPS6KA1	-2.83	0.003	SCN9A	-7.87	0.001	AC074289.1	-4.05	0.002	RP11-816B18.1	-3.96	< 0.001
S1 POSTc RPMI US vs T0	SLC16A7	-2.8	0.003	CD52	-1.86	0.04	NRIR	-3.66	0.044	RP11-411D10.3	-2.53	0.023
S1 POSTc RPMI US vs T0	ARMC2	-7.04	0.011	APLF	4.2	0.023	RP11-57H12.3	-2.21	0.017	RP4-738P15.7	-2.68	0.006
S1 POSTc RPMI US vs T0	PPL	3.78	0.016	DUS1L	-4.52	0.005	ITGB2-AS1	-2.89	0.022	RP11-56L13.8	-7.96	0.001
S1 POSTc RPMI US vs T0	LDAH	-4.27	0.01	GPS1	-5.15	< 0.001	LMCD1-AS1	-2.33	0.036	RP1-199L16.2	-2.43	0.007
S1 POSTc RPMI US vs T0	TJP2	5.01	0.003	ROBO1	-7.33	0.006	LINC01630	-7.33	0.006	RP3-487J7.4	-3.12	0.002
S1 POSTc RPMI US vs T0	NEK6	4.28	0.019	TMEM154	-2.61	0.017	RP13-188A5.1	-3.51	< 0.001	RP4-681L3.3	-2.82	0.013
S1 POSTc RPMI US vs T0	CSF3R	-3.73	0.008	FAM153A	-2.86	0.013	SCAMP4	2.74	0.019	RP11-399E6.5	-3.34	0.022
S1 POSTc RPMI US vs T0	BCL11A	-6.34	< 0.001	UBE2E1	3.29	0.006	SPAG5-AS1	3.05	0.016	RP11-2B2.1	-3.03	0.005
S1 POSTc RPMI US vs T0	MXI1	2.4	0.017	SLC16A5	-7.26	0.007	RP11-301G19.1	-3.41	< 0.001	RP11-237N2.1	-2.42	0.007
S1 POSTc RPMI US vs T0	DUSP1	-2.92	0.006	CDK1	-4.73	0.003	AC003991.3	-3.26	0.001	CTD-2215E18.4	-2.52	0.01
S1 POSTc RPMI US vs T0	TEK	-7.04	0.011	FRMPD2	-6.88	0.017	OR2M3	-2.7	0.003	RP11-725P16.3	-2.7	0.007
S1 POSTc RPMI US vs T0	MTHFD1L	2.35	0.046	PRDM10	-3.66	0.044	OR9H1P	-2.52	0.006	RP11-490F3.3	-2.42	0.006
S1 POSTc RPMI US vs T0	NUDCD1	-4.77	0.002	FOS	-4.59	< 0.001	CCT6P1	2.89	0.028	RP11-58N22.1	-3.29	0.006
S1 POSTc RPMI US vs T0	MTRF1	-8.54	< 0.001	CD14	-7.78	0.002	RP11-110G21.1	-3.96	0.023	RP4-660H19.2	-2.85	0.037
S1 POSTc RPMI US vs T0	TGFBI	-8.57	< 0.001	MZB1	-2.78	0.008	AC010745.2	-2.86	0.004	RP11-645I23.1	-2.25	0.025
S1 POSTc RPMI US vs T0	EPHX2	-2.72	0.011	DPY19L2P2	-3.18	0.003	SEPTIN7-DT	-3.96	0.023	RP4-592A1.5	-2.28	0.017
S1 POSTc RPMI US vs T0	TEX14	-7.68	0.002	ARMC10	-3.36	0.003	UBAC2-AS1	-4.09	0.016	CTA-392G7.1	-2.96	0.012
S1 POSTc RPMI US vs T0	ZNF211	4.63	0.008	RIOX2	-4.92	0.002	CCDC26	-2.77	0.003	RP11-76P17.4	-3.3	< 0.001
S1 POSTc RPMI US vs T0	CSTA	-7.68	0.002	JUNB	-2.14	0.035	TTTY10	-2.84	0.002	RP11-316A16.2	-3.85	0.005
S1 POSTc RPMI US vs T0	CSMD2	-7.19	0.009	BCL2L1	-3.45	0.016	SNHG31	-3.81	< 0.001	RP1-274L7.5	-2.28	0.011
S1 POSTc RPMI US vs T0	ZRANB3	-3.17	0.038	OR2AT4	-2.03	0.029	AJ006998.2	-7.78	0.002	RP3-425C14.8	-2.56	0.008
S1 POSTc RPMI US vs T0	MTIF3	2.1	0.022	ANO5	-3.73	0.008	MIR181A1HG	-7.04	0.011	RP11-799O21.2	-2.25	0.013
S1 POSTc RPMI US vs T0	ODF2L	-1.95	0.03	CTPS1	-3.72	0.002	ELOVL2-AS1	-8.8	< 0.001	RP11-404C6.6	-2.69	0.003
S1 POSTc RPMI US vs T0	RPAP2	-2.63	0.003	NINJ2	-7.51	0.003	ZNF674-AS1	-6.78	0.022	RP11-26A3.1	-2.72	0.024
S1 POSTc RPMI US vs T0	BBS9	-3.66	0.044	RRM2	-3.23	0.032	LINC02558	-2.85	0.006	AC006296.4	-3.77	< 0.001
S1 POSTc RPMI US vs T0	KLHL7	2.83	0.033	ATPAF2	-4.77	0.002	HCG18	-2.26	0.013	RP11-379L12.1	-7.26	0.007
S1 POSTc RPMI US vs T0	GLIPR2	-3.79	0.001	SHLD1	-3.89	0.029	KLF3-AS1	-2.37	0.026	RP11-154D6.3	-2.51	0.011
S1 POSTc RPMI US vs T0	RECK	3.66	0.022	MAL	-1.91	0.037	AC002451.3	-2.72	0.013	CTD-2007H18.2	-2.36	0.013
S1 POSTc RPMI US vs T0	P4HA1	4.96	< 0.001	OR1A1	-2.39	0.01	AC013448.1	-2.48	0.013	RP11-527D7.1	-2.89	0.015
S1 POSTc RPMI US vs T0	CENPK	-2.32	0.023	SNTB1	-4.15	0.013	IGHV4-31	-4.42	0.006	RP1-81D8.7	-2.66	0.005
S1 POSTc RPMI US vs T0	G0S2	-8.39	< 0.001	SPTLC3	-3.01	0.002	RP11-310E22.7	-3.03	0.014	PTCSC1	-4.21	0.011
S1 POSTc RPMI US vs T0	CTCFL	-7.96	0.001	OR5A1	-2.78	0.006	SILC1	-2.39	0.009	RP5-1128N12.4	-2.54	0.014
S1 POSTc RPMI US vs T0	PPP4R1L	-4.15	0.013	ARNT2	-7.19	0.009	IGHV3-43	-2.96	0.026	RP11-667L17.1	-2.47	0.039
S1 POSTc RPMI US vs T0	TRERF1	-2.41	0.046	MANEA	-7.19	0.009	RP11-47I22.3	-1.99	0.038	RP11-702N8.3	-2.58	0.004
S1 POSTc RPMI US vs T0	ABCC10	-3.73	0.008	MAB21L4	-7.78	0.002	LINC01722	-3.14	0.003	CH17-3B23.3	-3.06	0.013
S1 POSTc RPMI US vs T0	CPNE5	-7.12	0.011	PPP1CA	-2.22	0.013	LINC00884	-1.98	0.05	RP11-986E7.8	-3.74	0.044
S1 POSTc RPMI US vs T0	CLYBL	-4.96	0.001	CTSW	-3.05	0.001	LINC00892	-7.73	0.002	RP11-513H8.2	-2.58	0.016
S1 POSTc RPMI US vs T0	IRF1	1.97	0.031	ZFAND4	-3.4	0.019	CCDC144NL-AS1	-2.88	0.011	RP11-363F12.1	-3.82	0.036
S1 POSTc RPMI US vs T0	DMAC2L	-5.02	0.001	LRRC20	-6.78	0.022	AC007743.1	-2.32	0.01	RP11-686L6.1	-4.03	0.003
S1 POSTc RPMI US vs T0	MBOAT7	6.29	< 0.001	OR4D9	-2.85	0.037	CHRM3-AS2	-2.42	0.026	RP11-220I15.1	-2.28	0.018
S1 POSTc RPMI US vs T0	TRIP10	3.73	0.008	CES3	-4.52	0.005	SLC26A4-AS1	-2.79	0.003	RP11-490P18.1	-3.17	0.038
S1 POSTc RPMI US vs T0	FOSB	-3.58	< 0.001	NBEA	-6.96	0.013	MIR4280HG	-2.08	0.04	RP11-354P17.16	-4.09	0.016
S1 POSTc RPMI US vs T0	ITPA	-2.74	0.012	LCLAT1	-2.27	0.016	RP11-305F18.1	-1.92	0.039	NA	NA	NA
S1 PREc PLSM ST vs PREc PLSM US	AK2	2.7	0.018	MFN2	-2.99	0.021	TNFAIP8	3.02	0.001	SPACA6	-3.43	0.007
S1 PREc PLSM ST vs PREc PLSM US	FAM214B	4.74	0.004	GBP1	3.33	< 0.001	MEGF10	-7.34	0.011	TRAK1	-3.97	0.012
S1 PREc PLSM ST vs PREc PLSM US	SPATA20	7.21	0.014	ID3	2.38	0.021	TENM2	-7.68	0.004	COL18A1	7.33	0.009
S1 PREc PLSM ST vs PREc PLSM US	PROM1	4.34	0.016	PIK3R3	-3.82	0.021	GFOD1	3.33	0.006	CADM1	7.38	0.007
S1 PREc PLSM ST vs PREc PLSM US	ETV7	3.36	0.039	DARS2	-2.2	0.043	MDH2	3.51	0.025	TREX2	7.27	0.011
S1 PREc PLSM ST vs PREc PLSM US	PLAUR	4.49	< 0.001	CTSD	7.85	0.002	MEPCE	-2.9	0.013	PSMG1	-4.05	0.004
S1 PREc PLSM ST vs PREc PLSM US	TYROBP	5.12	0.001	IFT46	-3.56	0.003	IL2RG	2.13	0.027	PCBP3	7.14	0.016
S1 PREc PLSM ST vs PREc PLSM US	SEMA3B	-2.89	0.032	USP35	-4.87	0.003	MED22	-2.57	0.023	CHEK2	-3.91	0.004
S1 PREc PLSM ST vs PREc PLSM US	DNASE1L1	-4.8	0.004	RNF146	7.01	0.021	GSTO1	2.6	0.021	LRTOMT	-5.25	< 0.001
S1 PREc PLSM ST vs PREc PLSM US	MAMLD1	8.51	< 0.001	MYL12B	2.04	0.038	SERPING1	4.8	0.004	UBE2F	2.72	0.006
S1 PREc PLSM ST vs PREc PLSM US	NPC1L1	-4.94	0.003	LDAH	7.08	0.016	PLCH2	-4.55	0.009	PDE4B	4.87	< 0.001
S1 PREc PLSM ST vs PREc PLSM US	CD74	2.48	0.008	KDSR	2.67	0.035	MPZL2	7.93	0.001	MAFF	5.84	< 0.001
S1 PREc PLSM ST vs PREc PLSM US	SERPINB1	-2.85	0.039	IFIT3	-2.15	0.041	DLAT	-4.46	0.011	NOMO2	3.32	0.039
S1 PREc PLSM ST vs PREc PLSM US	SLAMF7	4.68	0.006	IFIT2	-2.5	0.01	TIMM8B	3.47	0.025	TNFAIP2	9.72	< 0.001
S1 PREc PLSM ST vs PREc PLSM US	TNFRSF1B	2.85	0.011	CD274	7.68	0.003	THRB	7.01	0.021	ARL15	6.93	0.027
S1 PREc PLSM ST vs PREc PLSM US	ANK1	-4.36	0.016	CENPL	-3	0.009	MBIP	2.87	0.01	TARS3	-2.76	0.008
S1 PREc PLSM ST vs PREc PLSM US	ARHGAP31	5.63	< 0.001	NUDCD1	2.98	0.041	ANKAR	-4.72	0.006	LINC00158	8.14	< 0.001
S1 PREc PLSM ST vs PREc PLSM US	EIPR1	7.72	0.003	EPC1	-2.08	0.036	RABGAP1L	-2.95	0.001	MUC1	4.13	0.03
S1 PREc PLSM ST vs PREc PLSM US	VCL	-3.01	0.016	MTERF2	-5.3	< 0.001	IFIT5	-7.52	0.007	PSMD13	2.39	0.016
S1 PREc PLSM ST vs PREc PLSM US	AP2S1	3.48	0.003	DUSP4	4.5	< 0.001	PRDM8	3.48	0.003	IFIT1	-3.34	0.003
S1 PREc PLSM ST vs PREc PLSM US	LCP2	2.29	0.019	TRIM25	2.4	0.017	MR1	6.93	0.027	NDUFA13	2.37	0.016
S1 PREc PLSM ST vs PREc PLSM US	TSPAN17	6.93	0.027	FAM117A	-2.98	0.018	TEX29	-4.36	0.016	PIP5K1C	6.93	0.027
S1 PREc PLSM ST vs PREc PLSM US	PER3	-4.64	0.007	CSMD2	7.08	0.016	PTPRD	-5.19	0.001	SLC36A2	-3.68	0.014
S1 PREc PLSM ST vs PREc PLSM US	NEDD4L	3.62	0.009	ZRANB3	-3.09	0.016	NRGN	-4.36	0.016	TMEM222	2.79	0.036
S1 PREc PLSM ST vs PREc PLSM US	HEXB	-3.42	0.03	SHLD2	-3.46	0.016	GBP5	5.01	< 0.001	CXCR3	6.69	0.047
S1 PREc PLSM ST vs PREc PLSM US	JKAMP	4.03	0.036	INHBA	7.59	0.004	SORBS2	-5.07	0.002	POFUT2	3.67	0.008
S1 PREc PLSM ST vs PREc PLSM US	RAD51	6.93	0.027	POLM	-5.13	0.001	MPPE1	-4.55	0.009	TNFRSF18	9.33	< 0.001
S1 PREc PLSM ST vs PREc PLSM US	HEBP2	7.14	0.016	MRM2	7.33	0.009	ZFYVE27	3.32	0.023	RNF220	4.65	0.006
S1 PREc PLSM ST vs PREc PLSM US	MPHOSPH9	-2.39	0.026	SRGN	3.27	< 0.001	SLA	2.49	0.011	PRR27	-4.46	0.011
S1 PREc PLSM ST vs PREc PLSM US	EIF2AK2	-2.23	0.021	EGR2	3.17	0.007	GRIP1	-5.13	0.001	RINL	6.77	0.036
S1 PREc PLSM ST vs PREc PLSM US	TARBP1	-4.36	0.016	VPS26A	4.49	< 0.001	KIF5A	-4.36	0.016	NWD1	-5.07	0.002
S1 PREc PLSM ST vs PREc PLSM US	YBX3	7.49	0.006	ACOT9	4.05	< 0.001	MCU	-2.48	0.048	FAM120AOS	-2.59	0.022
S1 PREc PLSM ST vs PREc PLSM US	GNA15	7.21	0.014	NR4A1	5.71	< 0.001	HK1	2.24	0.021	RELN	-3.97	0.012
S1 PREc PLSM ST vs PREc PLSM US	MON2	3.32	0.039	CDK2	3.68	0.015	UBE2L6	3.66	< 0.001	LITAF	2.68	0.005
S1 PREc PLSM ST vs PREc PLSM US	ZNF275	4.58	0.007	ATG101	2.99	0.009	UNC5D	-7.52	0.007	TMEM120A	5.1	0.001
S1 PREc PLSM ST vs PREc PLSM US	RFXANK	-2.85	0.016	CHPF	7.54	0.005	EXOG	2.55	0.048	IL1RAP	-3.34	0.006
S1 PREc PLSM ST vs PREc PLSM US	CHI3L2	-8.34	< 0.001	TRERF1	-3.15	0.016	CACNA1D	-3.3	0.01	HLA-DRB1	3.33	0.006
S1 PREc PLSM ST vs PREc PLSM US	WDR18	4.68	0.006	H2BC11	-3.13	0.014	CACNA2D3	-7.52	0.007	OR2C3	6.85	0.036
S1 PREc PLSM ST vs PREc PLSM US	TGFBR3	-6.3	< 0.001	CDKN1A	2.05	0.035	MX1	-3.22	< 0.001	IPO4	3.6	0.01
S1 PREc PLSM ST vs PREc PLSM US	ATP1B3	2.08	0.035	MT2A	2.66	0.009	DGKI	-3.82	0.021	MMP1	8.38	0.001
S1 PREc PLSM ST vs PREc PLSM US	MGAT4A	-3.75	< 0.001	GPR18	-2.65	0.009	SLC34A2	-4.36	0.016	SCN8A	-3.65	0.031
S1 PREc PLSM ST vs PREc PLSM US	EPN2	-3.27	0.043	IL1B	8.35	0.001	PRXL2B	7.63	0.003	ZSCAN25	7.01	0.021
S1 PREc PLSM ST vs PREc PLSM US	PTGS2	9.97	< 0.001	TRIP10	4.91	0.003	BABAM2	8.14	< 0.001	ACSL5	2.97	0.004
S1 PREc PLSM ST vs PREc PLSM US	IPCEF1	-2.22	0.031	MKKS	7.68	0.003	GDPD5	8.14	< 0.001	SERPINA1	11.07	< 0.001
S1 PREc PLSM ST vs PREc PLSM US	RBM7	-2.21	0.025	FAM110A	-2.2	0.027	NBL1	7.27	0.011	SLC22A5	-2.99	0.021
S1 PREc PLSM ST vs PREc PLSM US	UBE2T	7.49	0.006	UROD	5.14	< 0.001	FCER1G	2.92	0.039	PDGFA	3.21	0.034
S1 PREc PLSM ST vs PREc PLSM US	CST7	7.33	0.009	PCID2	4.3	0.018	ATP5MC1	2.88	0.012	SERPINB2	10.06	< 0.001
S1 PREc PLSM ST vs PREc PLSM US	SYNJ2	2.84	0.008	THRA	-2.35	0.03	CHCHD6	6.85	0.036	DPP4	3.44	0.029
S1 PREc PLSM ST vs PREc PLSM US	TP73	-7.34	0.011	STAT5A	2.89	0.003	WDR4	7.44	0.007	NRAP	6.69	0.047
S1 PREc PLSM ST vs PREc PLSM US	FKBP7	-3.27	0.043	PRKCG	-4.72	0.006	CSTB	2.15	0.038	PLCG2	-2.48	0.024
S1 PREc PLSM ST vs PREc PLSM US	CXCL2	8.1	< 0.001	IFI6	-2.74	0.003	ZNF714	-2.95	0.011	FCGR1B	-4.94	0.003
S1 PREc PLSM ST vs PREc PLSM US	TCF7	-2.15	0.025	SLC10A3	-5.45	< 0.001	ANO10	-4.46	0.011	UNC13B	6.77	0.036
S1 PREc PLSM ST vs PREc PLSM US	IL12RB2	-4.14	0.003	TPST2	3.16	0.005	RECQL4	-4.55	0.009	SYCP1	-5.01	0.002
S1 PREc PLSM ST vs PREc PLSM US	CD82	2.04	0.046	SPECC1	2.23	0.038	PLXDC1	-3.62	0.016	GK	2.62	0.016
S1 PREc PLSM ST vs PREc PLSM US	PILRA	-4.36	0.016	POT1	7.14	0.016	GRIN2C	-3.15	0.016	OPA1	4.72	< 0.001
S1 PREc PLSM ST vs PREc PLSM US	IGSF9	-4.11	0.007	MINDY2	-2.36	0.047	PRPSAP1	-3.43	0.007	RN7SKP203	-2.68	0.012
S1 PREc PLSM ST vs PREc PLSM US	ABCB1	4.2	< 0.001	ASH2L	-3.39	0.008	FMNL3	2.82	0.021	RN7SKP180	-4.36	0.016
S1 PREc PLSM ST vs PREc PLSM US	CETP	-4.29	0.005	CDKN1C	-2.78	0.006	CXCL16	4.48	0.011	RN7SKP71	-2.42	0.041
S1 PREc PLSM ST vs PREc PLSM US	GNAO1	-2.59	0.022	SNX9	2.23	0.025	AMDHD2	6.69	0.047	7SK	-2.47	0.012
S1 PREc PLSM ST vs PREc PLSM US	SH3BP2	2.77	0.007	NDUFA10	2.4	0.024	GBP2	2.38	0.012	H2AC18	-2.1	0.046
S1 PREc PLSM ST vs PREc PLSM US	GNA11	-3.35	0.036	FCHO1	8.17	< 0.001	GBP4	2.31	0.016	TMEM273	2.57	0.013
S1 PREc PLSM ST vs PREc PLSM US	P2RX7	4.06	< 0.001	PGPEP1	2.64	0.028	SLAMF6	-7.43	0.009	TAP2	3.77	0.002
S1 PREc PLSM ST vs PREc PLSM US	KDM2B	-2.52	0.021	IQCN	-2.72	0.004	CTSS	3.87	< 0.001	HLA-DRA	3.57	< 0.001
S1 PREc PLSM ST vs PREc PLSM US	TASP1	6.69	0.047	CYP2G1P	-4.64	0.007	ANTXR2	2.07	0.036	PJVK	-7.52	0.007
S1 PREc PLSM ST vs PREc PLSM US	ICAM1	3.35	0.021	EXOSC2	-3.91	0.007	GPR155	-3.2	0.003	NCR3	7.33	0.009
S1 PREc PLSM ST vs PREc PLSM US	SPG21	-2.39	0.029	DKC1	2.65	0.006	CIP2A	-7.34	0.011	PPP1R11	2.31	0.046
S1 PREc PLSM ST vs PREc PLSM US	LRRFIP2	2.27	0.019	ZNF227	4.21	0.021	AIM2	2.89	0.007	HLA-G	8.56	< 0.001
S1 PREc PLSM ST vs PREc PLSM US	CREM	3.7	< 0.001	HACL1	-2.07	0.048	PTPN13	-7.34	0.011	HLA-F	2.16	0.029
S1 PREc PLSM ST vs PREc PLSM US	SIRT1	-2.44	0.015	C1orf159	7.01	0.021	TMEM41A	-3.42	0.03	C4orf47	-4.8	0.004
S1 PREc PLSM ST vs PREc PLSM US	ABL1	-3.35	0.036	NINJ1	5.25	< 0.001	PPM1M	8.1	< 0.001	IGLV2-14	-4.45	0.003
S1 PREc PLSM ST vs PREc PLSM US	ERMP1	-2.76	0.012	ENOSF1	2.83	0.014	ANXA5	2.54	0.008	TRDC	7.01	0.021
S1 PREc PLSM ST vs PREc PLSM US	OCEL1	6.93	0.027	EMILIN2	-3.09	0.019	ANAPC10	4.13	0.03	IGHG1	-4.31	< 0.001
S1 PREc PLSM ST vs PREc PLSM US	MARCHF2	-4.72	0.006	FIGNL1	4.14	0.003	OTUD4	2.35	0.017	LINC01089	-3.43	0.007
S1 PREc PLSM ST vs PREc PLSM US	BCL2L13	-3.52	0.005	ITGB4	-5.55	< 0.001	ITGA2	4.37	0.014	HAUS7	7.44	0.007
S1 PREc PLSM ST vs PREc PLSM US	GGT5	-3.35	0.036	CASP9	7.44	0.007	STARD4	2.71	0.043	CLIC1	3.97	< 0.001
S1 PREc PLSM ST vs PREc PLSM US	LGALS1	2.03	0.043	POMP	2.89	0.003	SPINK1	4.56	< 0.001	UBD	10.05	< 0.001
S1 PREc PLSM ST vs PREc PLSM US	CHKB	6.69	0.047	KRBA1	3.99	0.043	RHOBTB3	6.69	0.047	NAXD	7.85	0.002
S1 PREc PLSM ST vs PREc PLSM US	IFT27	-7.89	0.002	ZNF767P	-4.36	0.016	SERINC5	-2.4	0.014	TSPAN4	7.27	0.011
S1 PREc PLSM ST vs PREc PLSM US	KIAA0930	6.69	0.047	RRAS2	2.98	0.017	UBLCP1	6.69	0.047	CPEB1	-5.63	< 0.001
S1 PREc PLSM ST vs PREc PLSM US	SDR39U1	4.06	< 0.001	CATSPERB	-4.64	0.007	GFM2	-4.64	0.007	IFRD2	2.89	0.043
S1 PREc PLSM ST vs PREc PLSM US	SLC10A1	-3.69	< 0.001	IL2RA	2.66	0.006	SYTL3	2.38	0.02	TSTD1	3.62	0.009
[truncated: 11,670 more rows]
