# Supplementary figures and images for: How CD4+ T Cells Transcriptional Profile Is Affected by Culture Conditions: Towards the Design of Optimal In Vitro HIV Reactivation Assays
Source: MDPI journal article supplement (doi:10.3390/biomedicines11030888), 2023-03-13

Figure S3.

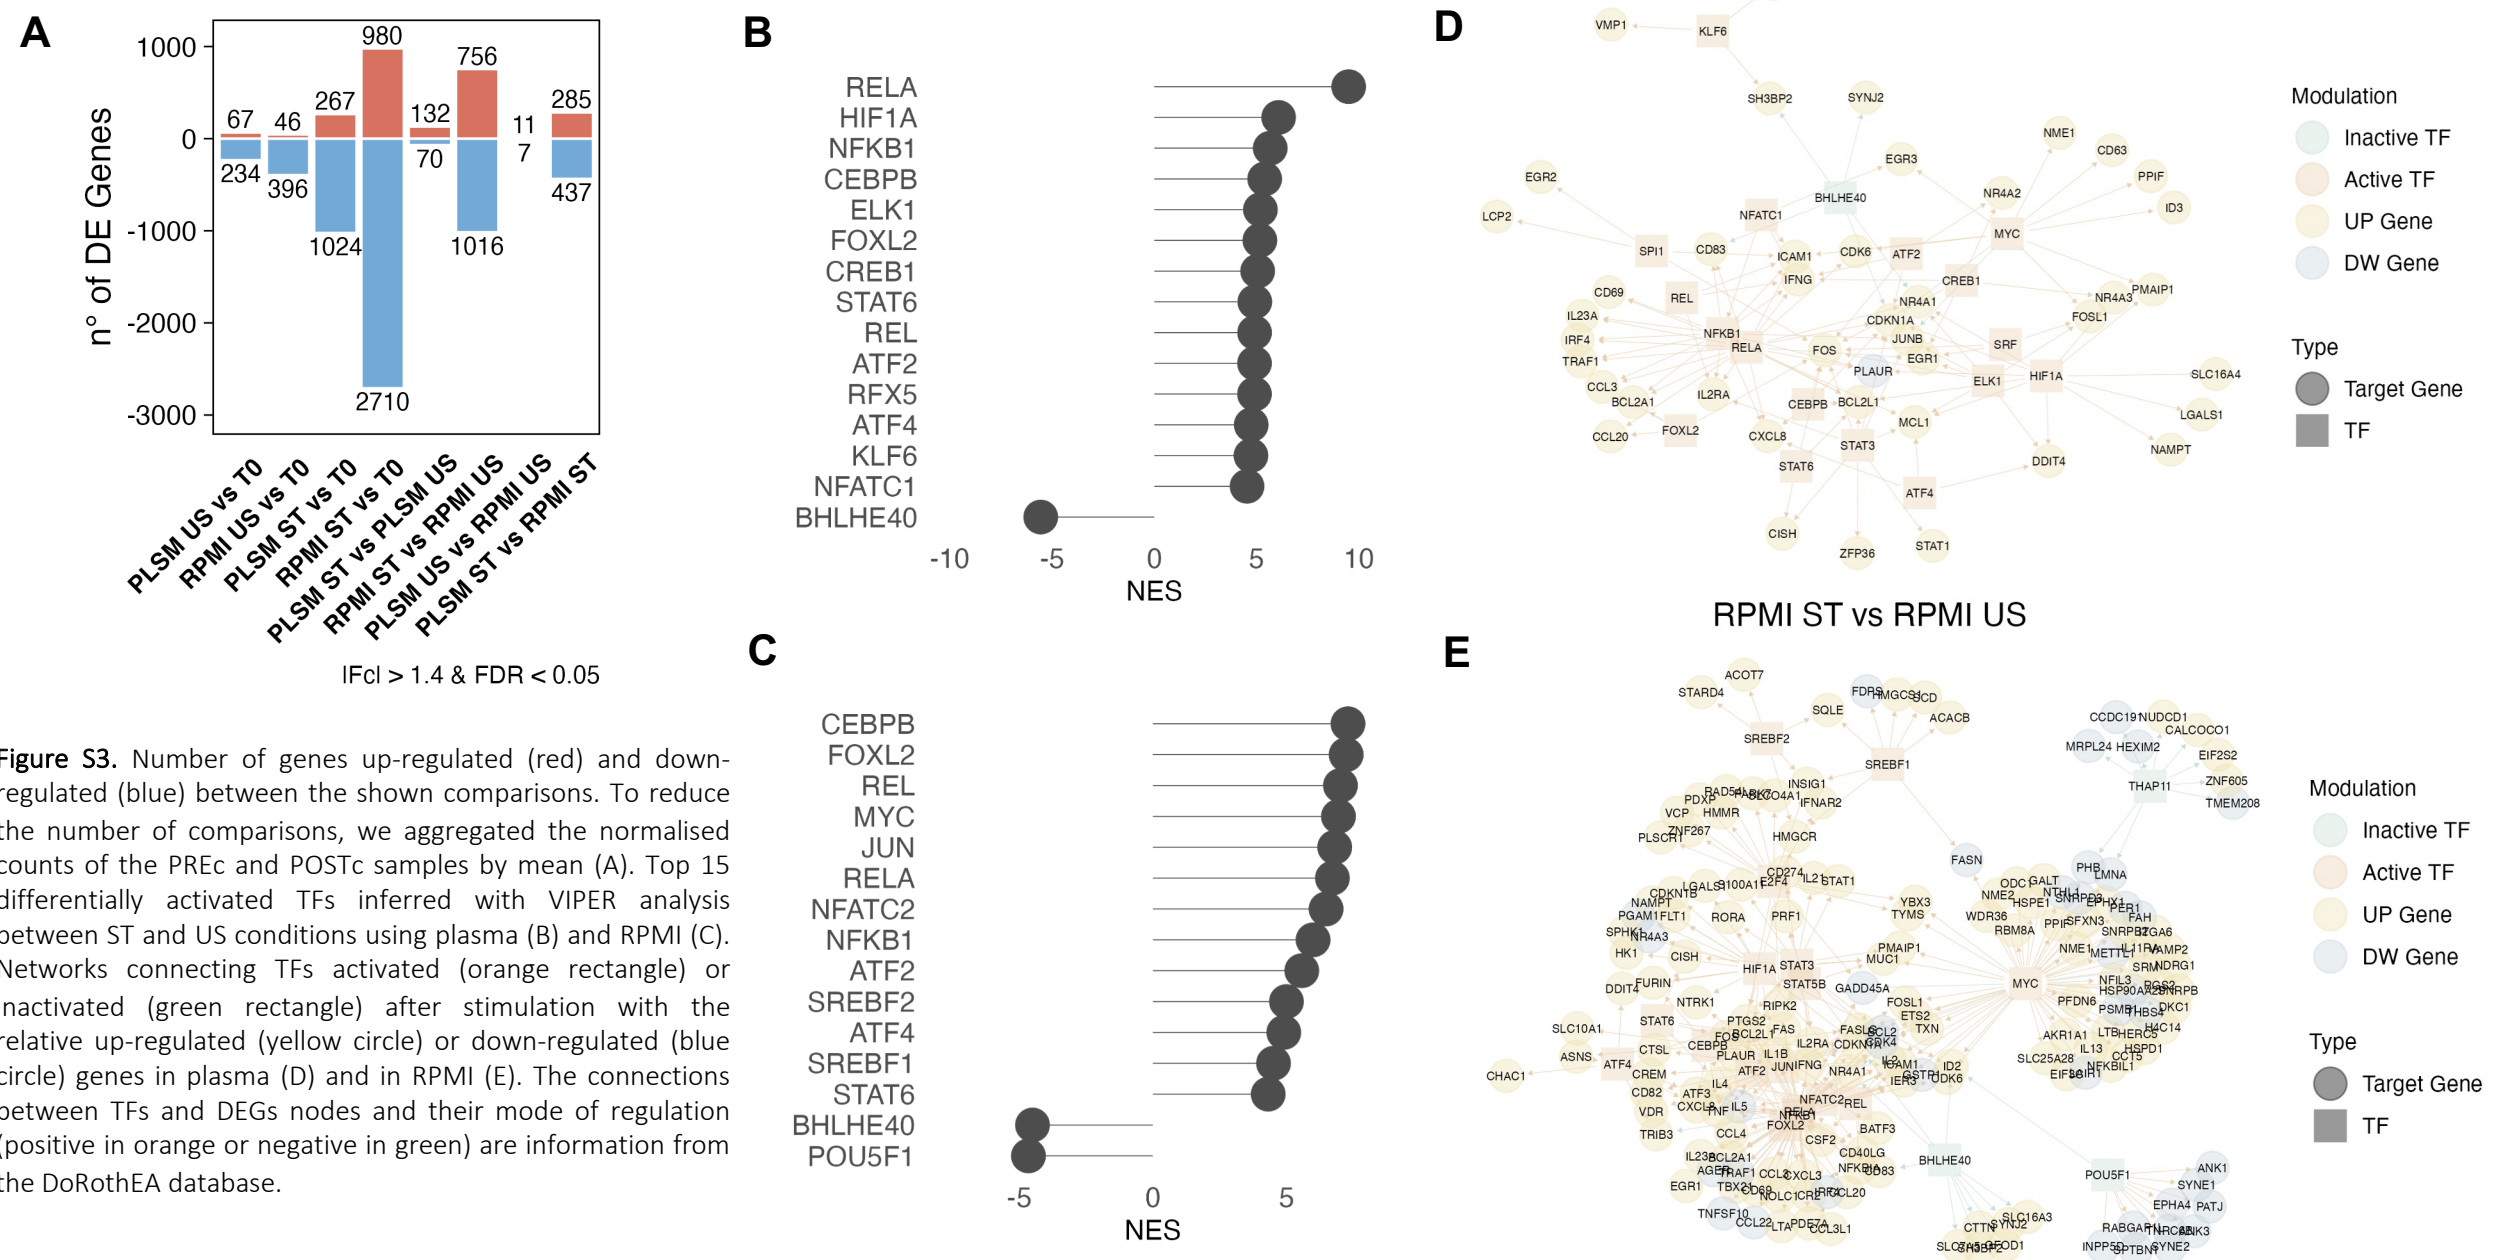

Supplement: s1 [file s1]
